# Supplementary material for: A concise construction of carbohydrate-tethered axially chiral allenes via copper catalysis
Source: Royal Society of Chemistry journal article supplement (doi:10.1039/c5qo00164a), 2015-01-01
Supplement: c5qo00164a1.pdf [file c5qo00164a1.pdf]

## A Concise Construction of Carbohydrate-tethered Axially Chiral Allenes via Copper Catalysis

Xin Huang, Can Xue, Chunling Fu, and Shengming Ma\*

Laboratory of Molecular Recognition and Synthesis, Department of Chemistry,  
Zhejiang University, Hangzhou 310027, Zhejiang, People's Republic of China.

Fax: (+86)21-64167510; E-mail: [masm@sioc.ac.cn](mailto:masm@sioc.ac.cn)

### Supporting Information

|                                                                                                                                      |          |
|--------------------------------------------------------------------------------------------------------------------------------------|----------|
| The apparatus used in this study                                                                                                     | S2       |
| General Experimental Methods                                                                                                         | S3       |
| Synthesis of carbohydrate-based axially chiral allenes<br>( <i>R<sub>a</sub></i> )- <b>4aa</b> ~( <i>R<sub>a</sub></i> )- <b>4kj</b> | S4-S28   |
| <sup>1</sup> H NMR, <sup>13</sup> C NMR and HPLC spectra of the compounds prepared                                                   | S29-S129 |

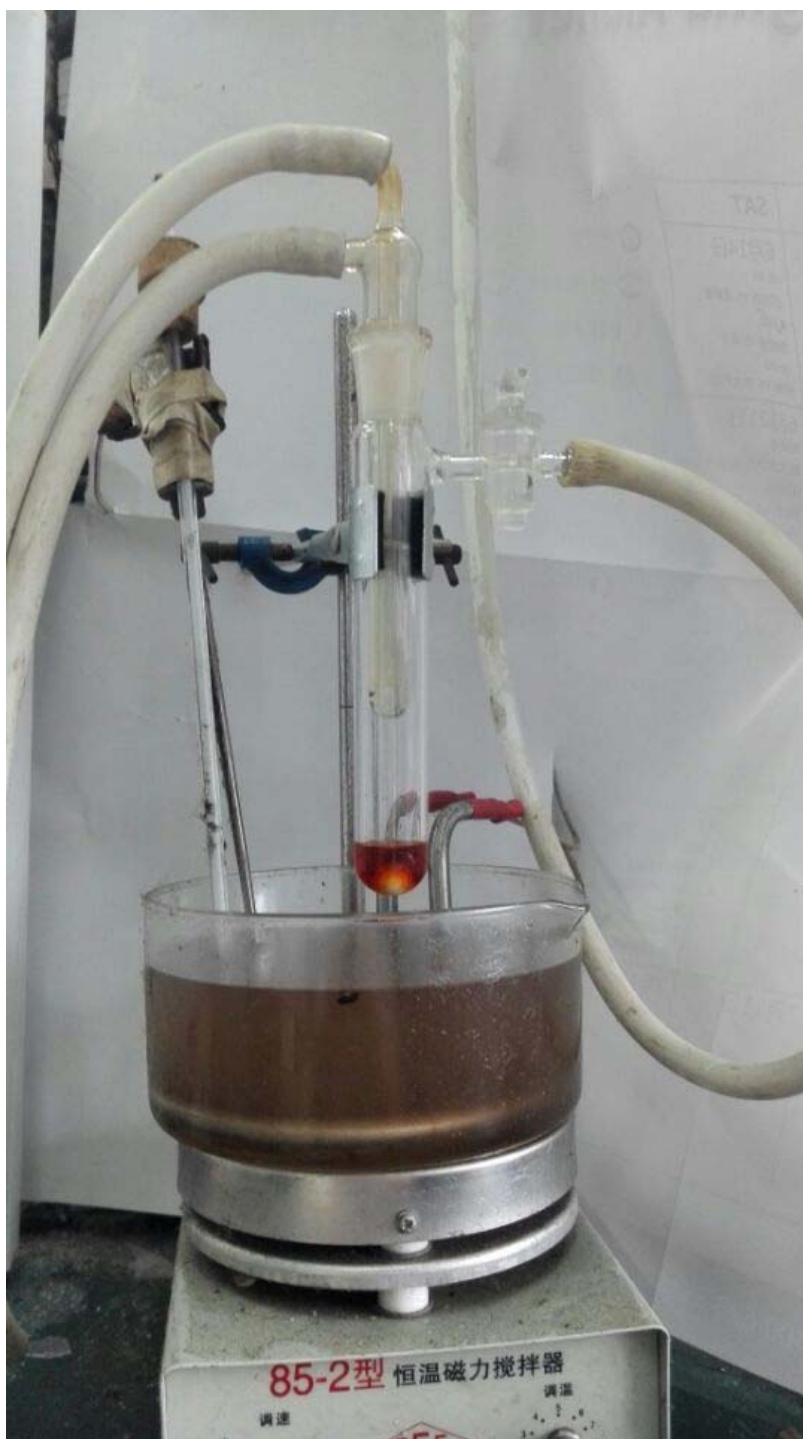

**Figure S1. The apparatus used in this study**

## General Experimental Methods

$^1\text{H}$  and  $^{13}\text{C}$  nuclear magnetic resonance spectra were recorded on an instrument operated at 300 MHz for  $^1\text{H}$  NMR and 75 MHz for  $^{13}\text{C}$  NMR spectra. Infrared spectra were recorded from the films of pure samples on sodium chloride plates for liquid or in the form of KBr discs for the solid samples. Mass and HRMS spectra were carried out in EI or ESI mode. Thin layer chromatography was performed on pre-coated glass-back plates and visualized with UV light at 254 nm. Flash column chromatography was performed on silica gel. Copper(II) bromide and copper(I) bromide were purchased from J&K. Copper(I) iodide was purchased from Shanghai Darui Fine Chemicals.  $\text{ZnBr}_2$  was purchased from Alfa Aesar and kept in a glove box. (*S*)- $\alpha,\alpha$ -Diphenylprolinol and (*R*)- $\alpha,\alpha$ -diphenylprolinol were purchased from Shanghai Darui Fine Chemicals. Aldehydes were distilled right before use. Dioxane and toluene were dried over sodium wire with benzophenone as the indicator and distilled freshly before use. All the temperatures are referred to the oil baths used.

The following examples (*R<sub>a</sub>*)-**4aa**~(*R<sub>a</sub>*)-**4ie** were prepared according to the Typical Procedure I except (*R<sub>a</sub>*)-**4ob**. Their corresponding racemic diastereoisomers were prepared by following the same procedure using racemic diphenylprolinol *rac*-**3**.

## 1. Preparation of (*R<sub>a</sub>*)-**4aa** and (*S<sub>a</sub>*)-**4aa**.

### (1) Preparation of (*R<sub>a</sub>*)-**4aa** on 1.0 mmol scale. hx-10-7

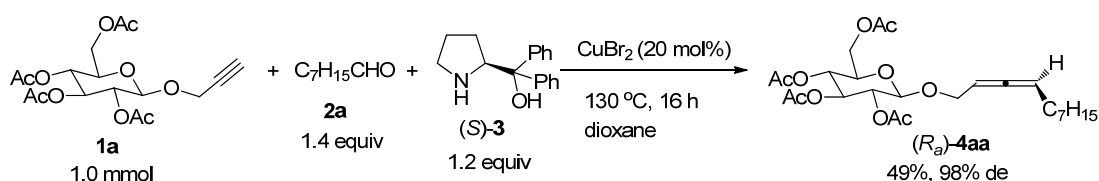

**Typical Procedure I:** To a flame-dried Schlenk tube were added  $\text{CuBr}_2$  (44.9 mg, 0.2 mmol), **1a** (387.0 mg, 1.0 mmol), (*S*)-**3** (304.5 mg, 1.2 mmol), and **2a** (180.1 mg, 1.4 mmol)/dioxane (3.0 mL) sequentially under nitrogen atmosphere. The Schlenk tube was then equipped with a condenser and the outlet connected to the vacuum line with a nitrogen flow was closed (For an apparatus, see Fig.1 in SI). The reaction was complete after being stirred at 130 °C for 16 h as monitored by TLC (eluent: petroleum ether/ethyl acetate = 3/1). Then the resulting mixture was diluted with ethyl acetate (30 mL), and washed with an aqueous solution of hydrochloric acid ( $v/v = 10\%$ , 20 mL). The organic layer was separated, and the aqueous layer was extracted with ethyl acetate (20 mL). The combined organic layer was washed with brine and dried over anhydrous  $\text{Na}_2\text{SO}_4$ . After filtration and evaporation, the residue was purified by chromatography (eluent: petroleum ether/ethyl acetate = 3/1) on silica gel to afford (*R<sub>a</sub>*)-**4aa** (246.5 mg, 49%) as a liquid: 98% de (HPLC conditions: Chiralcel AS-H column, hexane/*i*-PrOH = 95/5, 0.3 mL/min,  $\lambda = 214$  nm,  $t_{\text{R}}$ (major) = 24.9 min,  $t_{\text{R}}$ (minor) = 26.8 min);  $[\alpha]_{\text{D}}^{20} = -32.2$  ( $c = 1.07$ ,  $\text{CHCl}_3$ );  $^1\text{H NMR}$  (300 MHz,  $\text{CDCl}_3$ )

$\delta$  5.28-4.95 (m, 5 H), 4.64 (d,  $J = 7.8$  Hz, 1 H), 4.35-4.24 (m, 2 H), 4.18-4.07 (m, 2 H), 3.74-3.63 (m, 1 H), 2.09 (s, 3 H, Me), 2.05 (s, 3 H, Me), 2.03 (s, 3 H, Me), 2.01 (s, 3 H, Me), 2.12-1.94 (m, 2 H, CH<sub>2</sub>), 1.48-1.20 (m, 10 H, CH<sub>2</sub>  $\times$  5), 0.89 (t,  $J = 6.9$  Hz, 3 H, Me); <sup>13</sup>C NMR (75 Hz, CDCl<sub>3</sub>)  $\delta$  205.4, 170.5, 170.2, 169.3, 169.2, 98.8, 92.1, 87.2, 72.8, 71.6, 71.0, 68.2, 67.8, 61.7, 31.7, 28.98, 28.95, 28.9, 28.3, 22.5, 20.6, 20.52, 20.45, 20.4, 13.9; IR (neat)  $\nu$  (cm<sup>-1</sup>) 2928, 2856, 1963, 1757, 1435, 1370, 1226, 1165, 1041; MS (ESI,  $m/z$ ) 521 (M+Na<sup>+</sup>), 516 (M+NH<sub>4</sub><sup>+</sup>); Anal. Calcd. for C<sub>25</sub>H<sub>38</sub>O<sub>10</sub> (%): C 60.23, H 7.68; Found: C 60.21, H 7.37.

**(2) Preparation of (*R<sub>a</sub>*)-4aa on 5.0 mmol scale. hx-10-97**

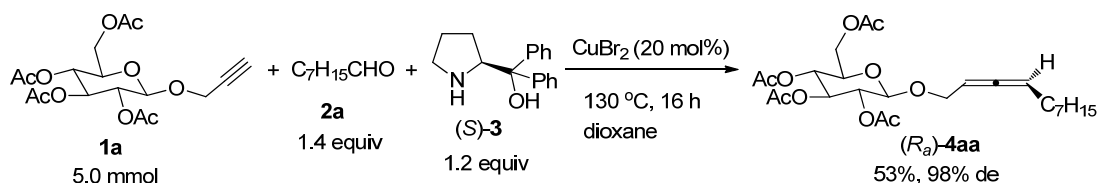

The reaction of CuBr<sub>2</sub> (0.2242 g, 1.0 mmol), **1a** (1.9282 g, 5.0 mmol), (*S*)-**3** (1.5181 g, 6.0 mmol), and **2a** (0.8974 g, 7.0 mmol) in dioxane (15.0 mL) afforded (*R<sub>a</sub>*)-**4aa** (1.3199 g, 53%) (eluent: petroleum ether/ethyl acetate = 3/1) as a liquid: 98% de (HPLC conditions: Chiralcel AS-H column, hexane/*i*-PrOH = 95/5, 0.4 mL/min,  $\lambda = 214$  nm,  $t_R$ (major) = 35.2 min,  $t_R$ (minor) = 37.2 min);  $[\alpha]_D^{20} = -29.8$  ( $c = 1.16$ , CHCl<sub>3</sub>); <sup>1</sup>H NMR (300 MHz, CDCl<sub>3</sub>)  $\delta$  5.27-4.97 (m, 5 H), 4.64 (d,  $J = 7.8$  Hz, 1 H), 4.34-4.25 (m, 2 H), 4.17-4.07 (m, 2 H), 3.73-3.64 (m, 1 H), 2.09 (s, 3 H, Me), 2.05 (s, 3 H, Me), 2.03 (s, 3 H, Me), 2.01 (s, 3 H, Me), 2.10-1.96 (m, 2 H, CH<sub>2</sub>), 1.48-1.22 (m, 10 H, CH<sub>2</sub>  $\times$  5), 0.89 (t,  $J = 6.8$  Hz, 3 H, Me).

**(3) Preparation of (*S<sub>a</sub>*)-4aa on 2.0 mmol scale. hx-10-98**

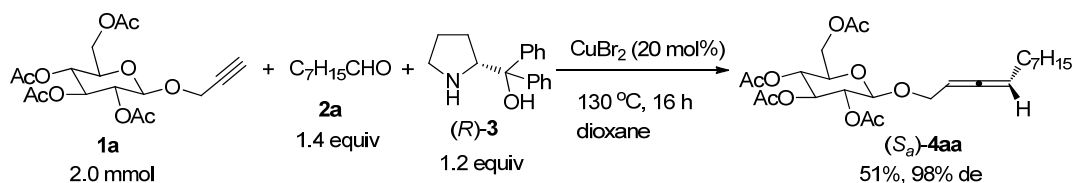

The reaction of  $\text{CuBr}_2$  (89.3 mg, 0.4 mmol), **1a** (772.5 mg, 2.0 mmol), **(R)-3** (607.6 mg, 2.4 mmol), and **2a** (360.6 mg, 2.8 mmol) in dioxane (6.0 mL) afforded **(S<sub>a</sub>)-4aa** (508.2 mg, 51%) (eluent: petroleum ether/ethyl acetate = 3/1) as a liquid: 98% de (HPLC conditions: Chiralcel AS-H column, hexane/*i*-PrOH = 95/5, 0.4 mL/min,  $\lambda = 214$  nm,  $t_{\text{R}}(\text{minor}) = 35.5$  min,  $t_{\text{R}}(\text{major}) = 36.5$  min);  $[\alpha]_{\text{D}}^{20} = +36.8$  ( $c = 0.975$ ,  $\text{CHCl}_3$ );  $^1\text{H NMR}$  (300 MHz,  $\text{CDCl}_3$ )  $\delta$  5.28-4.95 (m, 5 H), 4.64 (d,  $J = 7.8$  Hz, 1 H), 4.34-4.25 (m, 2 H), 4.18-4.07 (m, 2 H), 3.75-3.66 (m, 1 H), 2.08 (s, 3 H, Me), 2.04 (s, 3 H, Me), 2.03 (s, 3 H, Me), 2.00 (s, 3 H, Me), 2.12-1.95 (m, 2 H,  $\text{CH}_2$ ), 1.48-1.18 (m, 10 H,  $\text{CH}_2 \times 5$ ), 0.88 (t,  $J = 6.6$  Hz, 3 H, Me);  $^{13}\text{C NMR}$  (75 Hz,  $\text{CDCl}_3$ )  $\delta$  205.1, 170.3, 169.9, 169.1, 169.0, 98.7, 92.0, 87.1, 72.6, 71.5, 70.9, 68.1, 67.5, 61.6, 31.5, 28.8, 28.7, 28.1, 22.3, 20.39, 20.35, 20.3, 13.8; IR (neat)  $\nu$  ( $\text{cm}^{-1}$ ) 2929, 2857, 1962, 1759, 1435, 1367, 1227, 1166, 1040; MS (ESI,  $m/z$ ) 516 ( $\text{M}+\text{NH}_4^+$ ); Anal. Calcd. for  $\text{C}_{25}\text{H}_{38}\text{O}_{10}$  (%): C 60.23, H 7.68; Found: C 60.61, H 7.71.

## 2. Preparation of **(R<sub>a</sub>)-4ab**. hx-10-33

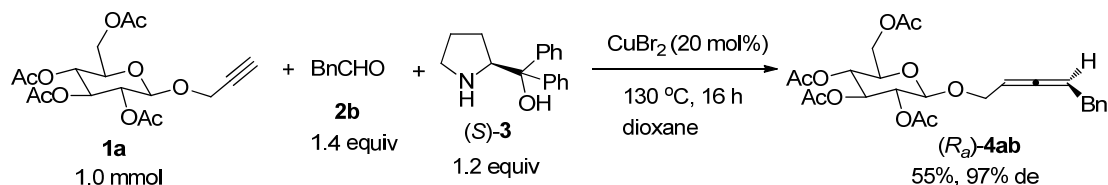

The reaction of  $\text{CuBr}_2$  (44.9 mg, 0.2 mmol), **1a** (388.1 mg, 1.0 mmol), **(S)-3** (303.3 mg, 1.2 mmol), and **2b** (168.8 mg, 1.4 mmol) in dioxane (3.0 mL) afforded **(R<sub>a</sub>)-4ab** (273.0 mg, 55%) (eluent: petroleum ether/ethyl acetate = 2.5/1) as a liquid:

97% de (HPLC conditions: Chiralcel IA-H column, hexane/*i*-PrOH = 95/5, 1.0 mL/min,  $\lambda = 214$  nm,  $t_R(\text{major}) = 16.4$  min,  $t_R(\text{minor}) = 23.0$  min);  $[\alpha]_D^{20} = -30.4$  ( $c = 1.405$ ,  $\text{CHCl}_3$ );  $^1\text{H NMR}$  (300 MHz,  $\text{CDCl}_3$ )  $\delta$  7.39-7.19 (m, 5 H, ArH), 5.50-5.37 (m, 1 H), 5.22-5.11 (m, 2 H), 5.06 (t,  $J = 9.6$  Hz, 1 H), 4.95 (t,  $J = 8.9$  Hz, 1 H), 4.35 (d,  $J = 7.8$  Hz, 1 H), 4.32-4.19 (m, 2 H), 4.13-4.02 (m, 2 H), 3.55-3.29 (m, 3 H), 2.07 (s, 3 H, Me), 2.029 (s, 3 H, Me), 2.026 (s, 3 H, Me), 2.00 (s, 3 H, Me);  $^{13}\text{C NMR}$  (75 Hz,  $\text{CDCl}_3$ )  $\delta$  205.7, 170.4, 170.0, 169.15, 169.06, 139.2, 128.34, 128.28, 126.3, 98.2, 91.5, 88.0, 72.5, 71.3, 70.8, 68.0, 67.0, 61.5, 34.7, 20.5, 20.42, 20.35; IR (neat)  $\nu$  ( $\text{cm}^{-1}$ ) 3063, 3028, 2945, 2884, 1964, 1756, 1602, 1495, 1450, 1433, 1370, 1226, 1165, 1041; MS (ESI,  $m/z$ ) 529 ( $\text{M}+\text{K}^+$ ), 513 ( $\text{M}+\text{Na}^+$ ), 508 ( $\text{M}+\text{NH}_4^+$ ); Anal. Calcd. for  $\text{C}_{25}\text{H}_{30}\text{O}_{10}$  (%): C 61.22, H 6.16; Found: C 61.32, H 6.03.

### 3. Preparation of (*R<sub>a</sub>*)-**4ac**. xc-12-18

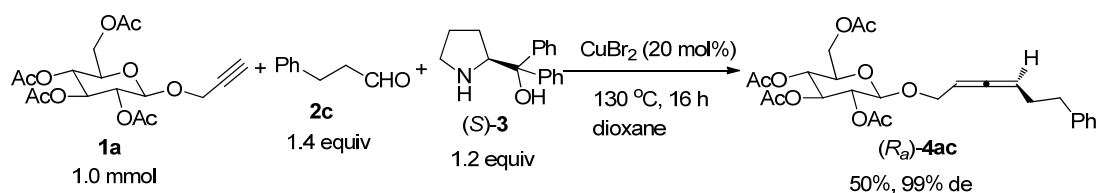

The reaction of  $\text{CuBr}_2$  (44.7 mg, 0.2 mmol), **1a** (386.1 mg, 1.0 mmol), (*S*)-**3** (303.5 mg, 1.2 mmol), and **2c** (187.6 mg, 1.4 mmol) in dioxane (3.0 mL) afforded (*R<sub>a</sub>*)-**4ac** (253.4 mg, 50%) (eluent: petroleum ether/ethyl acetate = 2.5/1) as a liquid: 99% de (HPLC conditions: Chiralcel OD-H column, hexane/*i*-PrOH = 90/10, 1.0 mL/min,  $\lambda = 214$  nm,  $t_R(\text{major}) = 13.1$  min,  $t_R(\text{minor}) = 19.3$  min);  $[\alpha]_D^{20} = -37.7$  ( $c = 1.32$ ,  $\text{CHCl}_3$ );  $^1\text{H NMR}$  (300 MHz,  $\text{CDCl}_3$ )  $\delta$  7.34-7.15 (m, 5 H), 5.31-4.95 (m, 5 H, ArH), 4.57 (d,  $J = 8.1$  Hz, 1 H), 4.32-4.18 (m, 2 H), 4.16-4.01 (m, 2 H), 3.70-3.61 (m, 1 H), 2.74 (t,  $J = 7.7$  Hz, 2 H), 2.40-2.28 (m, 2 H), 2.07 (s, 3 H, Me), 2.03 (s, 3 H,

Me), 2.02 (s, 3 H, Me), 2.00 (s, 3 H, Me);  $^{13}\text{C}$  NMR (75 Hz,  $\text{CDCl}_3$ )  $\delta$  205.3, 170.5, 170.2, 169.3, 169.2, 141.2, 128.4, 128.2, 125.9, 99.2, 91.5, 87.9, 72.8, 71.7, 71.2, 68.3, 67.7, 61.8, 35.1, 30.0, 20.59, 20.56, 20.49, 20.47; IR (neat)  $\nu$  ( $\text{cm}^{-1}$ ) 3063, 3024, 2942, 2861, 1964, 1757, 1603, 1496, 1453, 1432, 1369, 1225, 1165, 1041; MS (ESI,  $m/z$ ) 527 ( $\text{M}+\text{Na}^+$ ), 522 ( $\text{M}+\text{NH}_4^+$ ); Anal. Calcd. for  $\text{C}_{26}\text{H}_{32}\text{O}_{10}$  (%): C 61.90, H 6.39; Found: C 61.41, H 6.25. HRMS calcd. for  $\text{C}_{26}\text{H}_{36}\text{NO}_{10}$  ( $\text{M}+\text{NH}_4^+$ ): 522.2334; Found: 522.2322.

#### 4. Preparation of (*R<sub>a</sub>*)-4ad. hx-10-30

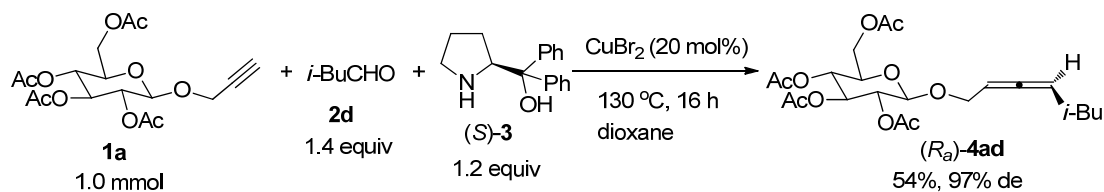

The reaction of  $\text{CuBr}_2$  (45.0 mg, 0.2 mmol), **1a** (385.4 mg, 1.0 mmol), (*S*)-**3** (304.1 mg, 1.2 mmol), and **2d** (121.2 mg, 1.4 mmol) in dioxane (3.0 mL) afforded (*R<sub>a</sub>*)-**4ad** (245.2 mg, 54%) (eluent: petroleum ether/ethyl acetate = 3/1) as a solid: 97% de (HPLC conditions: Chiralcel AD-H column, hexane/*i*-PrOH = 95/5, 1.0 mL/min,  $\lambda$  = 214 nm,  $t_{\text{R}}$ (minor) = 17.6 min,  $t_{\text{R}}$ (major) = 18.9 min);  $[\alpha]_{\text{D}}^{20}$  = -26.7 ( $c$  = 1.00,  $\text{CHCl}_3$ ); m.p. 68-69 °C (DCM/*n*-hexane);  $^1\text{H}$  NMR (300 MHz,  $\text{CDCl}_3$ )  $\delta$  5.28-4.95 (m, 5 H), 4.63 (d,  $J$  = 8.1 Hz, 1 H), 4.36-4.21 (m, 2 H), 4.20-4.04 (m, 2 H), 3.73-3.61 (m, 1 H), 2.09 (s, 3 H, Me), 2.06 (s, 3 H, Me), 2.04 (s, 3 H, Me), 2.02 (s, 3 H, Me), 2.17-1.87 (m, 2 H,  $\text{CH}_2$ ), 1.76-1.59 (m, 1 H, CH), 0.94 (d,  $J$  = 6.6 Hz, 6 H, Me  $\times$  2);  $^{13}\text{C}$  NMR (75 Hz,  $\text{CDCl}_3$ )  $\delta$  205.9, 170.5, 170.2, 169.23, 169.16, 98.8, 90.5, 86.5, 72.7, 71.6, 71.0, 68.1, 67.8, 61.7, 37.8, 28.1, 22.0, 21.9, 20.54, 20.51, 20.44, 20.42; IR (KBr)  $\nu$  ( $\text{cm}^{-1}$ ) 2957, 2871, 1964, 1757, 1434, 1369, 1226, 1165, 1041; MS



(ESI,  $m/z$ ) 479 ( $M+Na^+$ ), 474 ( $M+NH_4^+$ ); Anal. Calcd. for  $C_{22}H_{32}O_{10}$  (%): C 57.88, H 7.07; Found: C 57.89, H 7.08.

## 5. Preparation of (*R<sub>a</sub>*)-4ae. hx-10-34

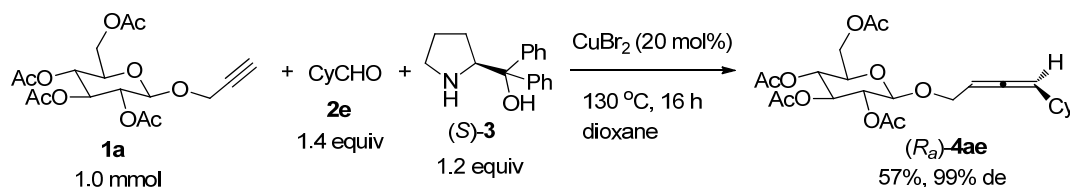

The reaction of  $CuBr_2$  (45.0 mg, 0.2 mmol), **1a** (388.5 mg, 1.0 mmol), (*S*)-**3** (305.5 mg, 1.2 mmol), and **2e** (157.5 mg, 1.4 mmol) in dioxane (3.0 mL) afforded (*R<sub>a</sub>*)-**4ae** (275.1 mg, 57%) (eluent: petroleum ether/ethyl acetate = 3/1) as a solid: 99% de (HPLC conditions: Chiralcel AD-H column, hexane/*i*-PrOH = 95/5, 1.0 mL/min,  $\lambda = 214$  nm,  $t_R$ (minor) = 16.4 min,  $t_R$ (major) = 19.1 min);  $[\alpha]_D^{20} = -37.5$  ( $c = 0.92$ ,  $CHCl_3$ ); m.p. 102-103 °C (DCM/*n*-hexane);  $^1H$  NMR (300 MHz,  $CDCl_3$ )  $\delta$  5.27-4.96 (m, 5 H), 4.66 (d,  $J = 8.1$  Hz, 1 H), 4.36-4.22 (m, 2 H), 4.19-4.05 (m, 2 H), 3.72-3.63 (m, 1 H), 2.09 (s, 3 H, Me), 2.05 (s, 3 H, Me), 2.03 (s, 3 H, Me), 2.01 (s, 3 H, Me), 2.22-1.89 (m, 1 H, CH), 1.81-1.60 (m, 5 H,  $CH_2 \times 2$  and one proton of  $CH_2$ ), 1.40-1.00 (m, 5 H,  $CH_2 \times 2$  and one proton of  $CH_2$ );  $^{13}C$  NMR (75 Hz,  $CDCl_3$ )  $\delta$  204.3, 170.4, 170.0, 169.2, 169.1, 98.7, 98.0, 88.1, 72.7, 71.5, 71.0, 68.1, 67.8, 61.6, 36.6, 32.8, 32.6, 25.8, 25.6, 20.5, 20.42, 20.36; IR (KBr)  $\nu$  ( $cm^{-1}$ ) 2925, 2851, 1965, 1741, 1447, 1412, 1380, 1287, 1260, 1227, 1171, 1115, 1094, 1058, 1036; MS (ESI,  $m/z$ ) 505 ( $M+Na^+$ ), 500 ( $M+NH_4^+$ ); Anal. Calcd. for  $C_{24}H_{34}O_{10}$  (%): C 59.74, H 7.10; Found: C 59.80, H 7.04.

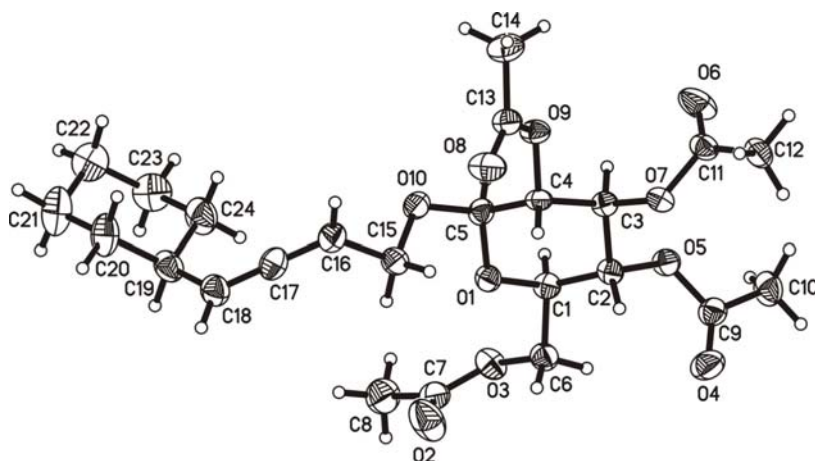

**Figure S2.** ORTEP representation of (*R<sub>a</sub>*)-**4ae**.

Crystal data for compound (*R<sub>a</sub>*)-**4ae**: C<sub>24</sub>H<sub>34</sub>O<sub>10</sub>, MW = 482.51, orthorhombic, space group *P 21 21 21*, final *R* indices [*I* > 2σ(*I*)], *R*1 = 0.0800, *wR*2 = 0.2036, *R* indices (all data) *R*1 = 0.1020, *wR*2 = 0.2267, *a* = 5.8507(10) Å, *b* = 14.177(2) Å, *c* = 30.834(4) Å, α = 90.00°, β = 90.00°, γ = 90.00°, *V* = 2557.5(7) Å<sup>3</sup>, *T* = 293(2) K, *Z* = 4, reflections collected/unique 15536 / 2706 (*R*<sub>int</sub> = 0.1325), number of observations [*I* > 2σ(*I*)] 2010, parameters: 313. CCDC 1013803 contains the supplementary crystallographic data for this paper. These data can be obtained free of charge from The Cambridge Crystallographic Data Centre via [www.ccdc.cam.ac.uk/data\\_request/cif](http://www.ccdc.cam.ac.uk/data_request/cif).

## 6. Preparation of (*R<sub>a</sub>*)-**4af**. hx-10-40

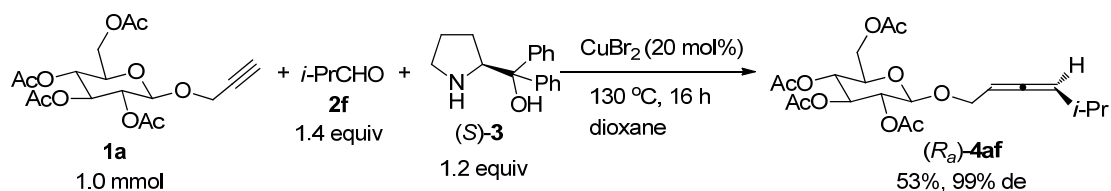

The reaction of CuBr<sub>2</sub> (44.7 mg, 0.2 mmol), **1a** (384.2 mg, 1.0 mmol), (*S*)-**3** (305.5 mg, 1.2 mmol), and **2f** (101.4 mg, 1.4 mmol) in dioxane (3.0 mL) afforded (*R<sub>a</sub>*)-**4af** (233.9 mg, 53%) (eluent: petroleum ether/ethyl acetate = 2.5/1) as a liquid:

99% de (HPLC conditions: Chiralcel IA-H column, hexane/*i*-PrOH = 95/5, 1.0 mL/min,  $\lambda = 214$  nm,  $t_R(\text{minor}) = 15.1$  min,  $t_R(\text{major}) = 16.1$  min);  $[\alpha]_D^{20} = -23.1$  ( $c = 1.08$ , CHCl<sub>3</sub>); <sup>1</sup>H NMR (300 MHz, CDCl<sub>3</sub>)  $\delta$  5.30-5.14 (m, 3 H), 5.10 (t,  $J = 9.6$  Hz, 1 H), 5.01 (dd,  $J_1 = 9.6$  Hz,  $J_2 = 8.1$  Hz, 1 H), 4.66 (d,  $J = 7.8$  Hz, 1 H), 4.36-4.24 (m, 2 H), 4.17-4.07 (m, 2 H), 3.72-3.64 (m, 1 H), 2.40-2.24 (m, 1 H, CH), 2.09 (s, 3 H, Me), 2.05 (s, 3 H, Me), 2.03 (s, 3 H, Me), 2.01 (s, 3 H, Me), 1.03 (d,  $J = 6.6$  Hz, 6 H, Me  $\times$  2); <sup>13</sup>C NMR (75 Hz, CDCl<sub>3</sub>)  $\delta$  204.0, 170.5, 170.2, 169.3, 169.2, 99.5, 98.7, 88.5, 72.8, 71.6, 71.1, 68.2, 67.9, 61.8, 27.5, 22.3, 22.2, 20.6, 20.51, 20.45, 20.4; IR (neat) v (cm<sup>-1</sup>) 2962, 2871, 1961, 1755, 1434, 1367, 1227, 1165, 1040; MS (ESI, m/z) 460 (M+NH<sub>4</sub><sup>+</sup>); Anal. Calcd. for C<sub>21</sub>H<sub>30</sub>O<sub>10</sub> (%): C 57.01, H 6.83; Found: C 57.05, H 6.72.

## 7. Preparation of (*R<sub>a</sub>*)-**4ag**. hx-11-91, hx-10-53

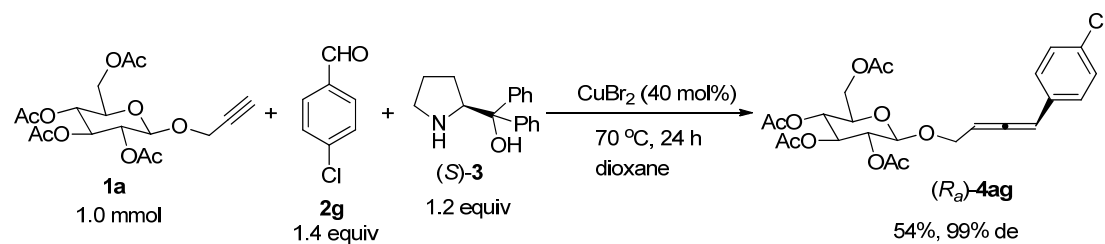

The reaction of CuBr<sub>2</sub> (89.7 mg, 0.4 mmol), **1a** (386.8 mg, 1.0 mmol), (*S*)-**3** (304.6 mg, 1.2 mmol), and **2g** (196.8 mg, 1.4 mmol) in dioxane (3.0 mL) afforded (*R<sub>a</sub>*)-**4ag** (277.3 mg, 54%) (eluent: petroleum ether/ethyl acetate = 2/1) as a liquid: 99% de (HPLC conditions: Chiralcel AD-H column, hexane/*i*-PrOH = 95/5, 0.6 mL/min,  $\lambda = 214$  nm,  $t_R(\text{major}) = 57.1$  min,  $t_R(\text{minor}) = 62.3$  min);  $[\alpha]_D^{20} = -111.8$  ( $c = 1.04$ , CHCl<sub>3</sub>); <sup>1</sup>H NMR (300 MHz, CDCl<sub>3</sub>)  $\delta$  7.34-7.27 (m, 2 H, ArH), 7.25-7.19 (m, 2 H, ArH), 6.23 (dt,  $J_1 = 6.2$  Hz,  $J_2 = 2.3$  Hz, 1 H, one proton of CH=C=CH), 5.65 (dd,  $J_1 = 13.8$  Hz,  $J_2 = 6.3$  Hz, 1 H, one proton of CH=C=CH), 5.22 (t,  $J = 9.5$  Hz, 1 H),

5.14-4.97 (m, 2 H), 4.65 (d,  $J = 7.8$  Hz, 1 H), 4.47-4.37 (m, 1 H), 4.29-4.18 (m, 2 H), 4.10 (dd,  $J_1 = 12.3$  Hz,  $J_2 = 2.4$  Hz, 1 H), 3.66-3.58 (m, 1 H), 2.03 (s, 3 H, Me), 2.02 (s, 3 H, Me), 2.00 (s, 3 H, Me), 1.99 (s, 3 H, Me);  $^{13}\text{C}$  NMR (75 Hz,  $\text{CDCl}_3$ )  $\delta$  206.4, 170.3, 169.9, 169.1, 169.0, 132.8, 132.0, 128.7, 127.9, 99.2, 94.9, 91.8, 72.7, 71.7, 71.1, 68.2, 66.6, 61.7, 20.4, 20.3; IR (neat)  $\nu$  ( $\text{cm}^{-1}$ ) 2956, 2925, 2869, 2849, 1953, 1755, 1492, 1456, 1429, 1376, 1224, 1039; MS (ESI,  $m/z$ ) 535 ( $\text{M}(^{37}\text{Cl})+\text{Na}^+$ ), 533 ( $\text{M}(^{35}\text{Cl})+\text{Na}^+$ ), 530 ( $\text{M}(^{37}\text{Cl})+\text{NH}_4^+$ ), 528 ( $\text{M}(^{35}\text{Cl})+\text{NH}_4^+$ ); HRMS calcd. for  $\text{C}_{24}\text{H}_{31}^{35}\text{ClNO}_{10}$  ( $\text{M}(^{35}\text{Cl})+\text{NH}_4^+$ ): 528.1631; Found: 528.1614.

## 8. Preparation of (*R*<sub>a</sub>)-**4ah**. hx-12-174, hx-10-62

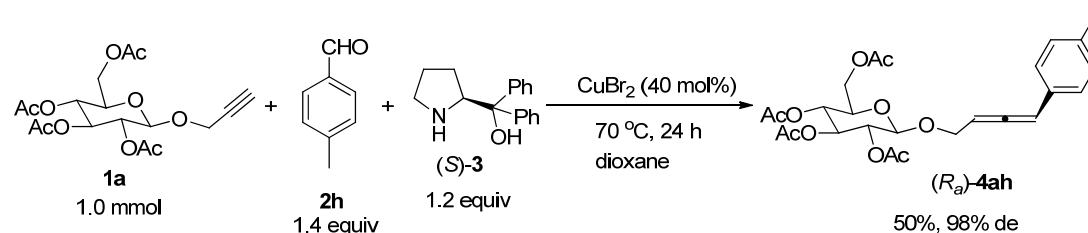

The reaction of  $\text{CuBr}_2$  (89.6 mg, 0.4 mmol), **1a** (385.8 mg, 1.0 mmol), (*S*)-**3** (304.2 mg, 1.2 mmol), and **2h** (169.1 mg, 1.4 mmol) in dioxane (3.0 mL) afforded (*R*<sub>a</sub>)-**4ah** (244.0 mg, 50%) (eluent: petroleum ether/ethyl acetate = 2/1) as a liquid: 98% de (HPLC conditions: Chiralcel AD-H column, hexane/*i*-PrOH = 94/6, 0.6 mL/min,  $\lambda = 214$  nm,  $t_{\text{R}}(\text{major}) = 91.9$  min,  $t_{\text{R}}(\text{minor}) = 99.9$  min);  $[\alpha]_{\text{D}}^{20} = -90.4$  ( $c = 0.81$ ,  $\text{CHCl}_3$ );  $^1\text{H}$  NMR (300 MHz,  $\text{CDCl}_3$ )  $\delta$  7.25-7.09 (m, 4 H, ArH), 6.28-6.20 (m, 1 H, one proton of  $\text{CH}=\text{C}=\text{CH}$ ), 5.64-5.54 (m, 1 H, one proton of  $\text{CH}=\text{C}=\text{CH}$ ), 5.22 (t,  $J = 9.5$  Hz, 1 H), 5.14-4.97 (m, 2 H), 4.66 (d,  $J = 7.8$  Hz, 1 H), 4.41 (ddd,  $J_1 = 12.0$  Hz,  $J_2 = 6.0$  Hz,  $J_3 = 2.4$  Hz, 1 H), 4.29-4.17 (m, 2 H), 4.05 (dd,  $J_1 = 12.3$  Hz,  $J_2 = 2.1$  Hz, 1 H), 3.55 (ddd,  $J_1 = 9.9$  Hz,  $J_2 = 4.5$  Hz,  $J_3 = 2.4$  Hz, 1 H), 2.34 (s, 3 H, Me), 2.02 (s,

6 H, Me × 2), 2.01 (s, 3 H, Me), 2.00 (s, 3 H, Me); <sup>13</sup>C NMR (75 Hz, CDCl<sub>3</sub>) δ 206.4, 170.3, 169.9, 169.1, 169.0, 136.9, 130.2, 129.2, 126.5, 98.7, 95.3, 90.9, 72.6, 71.5, 70.9, 68.0, 66.8, 61.4, 20.9, 20.33, 20.30, 20.26; IR (neat) ν (cm<sup>-1</sup>) 2944, 2869, 1950, 1755, 1513, 1432, 1367, 1227, 1166, 1040; MS (ESI, m/z) 529 (M+K<sup>+</sup>), 513 (M+Na<sup>+</sup>), 508 (M+NH<sub>4</sub><sup>+</sup>); HRMS calcd. for C<sub>25</sub>H<sub>34</sub>NO<sub>10</sub> (M+NH<sub>4</sub><sup>+</sup>): 508.2177; Found: 508.2164.

## 9. Preparation of (*R<sub>a</sub>*)-**4be**. hx-10-57

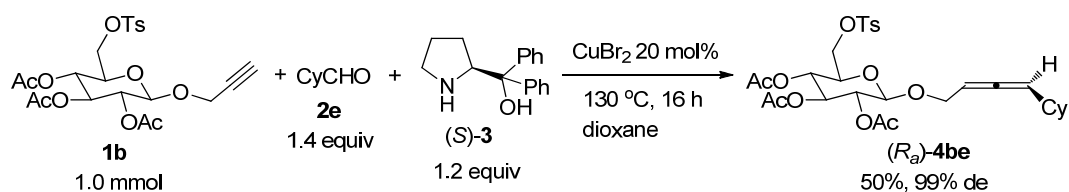

The reaction of CuBr<sub>2</sub> (45.0 mg, 0.2 mmol), **1b** (498.9 mg, 1.0 mmol), (*S*)-**3** (304.1 mg, 1.2 mmol), and **2e** (156.9 mg, 1.4 mmol) in dioxane (3.0 mL) afforded (*R*)-**4be** (297.4 mg, 50%) (eluent: petroleum ether/ethyl acetate = 2.5/1) as a solid: 99% de (HPLC conditions: Chiralcel IA-H column, hexane/*i*-PrOH = 80/20, 1.0 mL/min, λ = 214 nm, *t<sub>R</sub>*(minor) = 9.5 min, *t<sub>R</sub>*(major) = 10.9 min); [α]<sub>D</sub><sup>20</sup> = -21.6 (*c* = 0.97, CHCl<sub>3</sub>); m.p. 117-118 °C (EtOAc/*n*-hexane); <sup>1</sup>H NMR (300 MHz, CDCl<sub>3</sub>) δ 7.78 (d, *J* = 8.4 Hz, 2 H, ArH), 7.35 (d, *J* = 8.1 Hz, 2 H, ArH), 5.27-5.08 (m, 3 H), 4.97-4.86 (m, 2 H), 4.58 (d, *J* = 8.1 Hz, 1 H), 4.27-4.17 (m, 1 H), 4.16-3.97 (m, 3 H), 3.77-3.68 (m, 1 H), 2.45 (s, 3 H), 2.03 (s, 3 H, Me), 2.00 (s, 3 H, Me), 1.99 (s, 3 H, Me), 2.10-1.95 (m, 1 H, CH), 1.82-1.59 (m, 5 H, CH<sub>2</sub> × 2 and one proton of CH<sub>2</sub>), 1.40-0.98 (m, 5 H, CH<sub>2</sub> × 2 and one proton of CH<sub>2</sub>); <sup>13</sup>C NMR (75 Hz, CDCl<sub>3</sub>) δ 204.2, 170.1, 169.3, 169.1, 145.0, 132.2, 129.8, 127.9, 98.7, 98.2, 88.2, 72.4, 71.3, 70.8, 68.4, 67.9, 67.5, 36.6, 32.8, 32.7, 25.9, 25.7, 21.5, 20.47, 20.42, 20.39; IR (KBr)

$\nu$  (cm<sup>-1</sup>) 2926, 2852, 1962, 1758, 1598, 1449, 1369, 1245, 1218, 1178, 1040; MS (ESI, m/z) 612 (M+NH<sub>4</sub><sup>+</sup>); Anal. Calcd. for C<sub>29</sub>H<sub>38</sub>O<sub>11</sub>S (%): C 58.57, H 6.44; Found: C 58.81, H 6.38.

## 10. Preparation of (*R<sub>a</sub>*)-**4ce**. hx-10-56

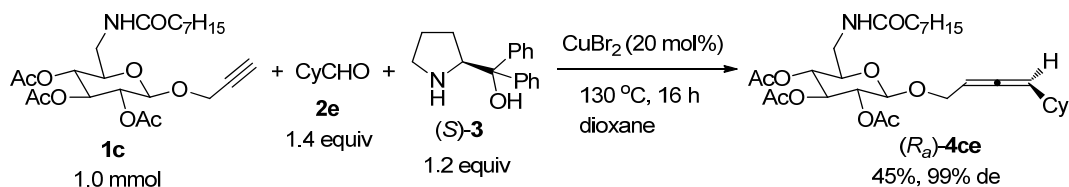

The reaction of CuBr<sub>2</sub> (44.9 mg, 0.2 mmol), **1c** (472.5 mg, 1.0 mmol), (*S*)-**3** (303.2 mg, 1.2 mmol), and **2e** (158.1 mg, 1.4 mmol) in dioxane (3.0 mL) afforded (*R<sub>a</sub>*)-**4ce** (256.2 mg, 45%) (eluent: petroleum ether/ethyl acetate = 1.5/1) as a liquid: 99% de (HPLC conditions: Chiralcel AD-H column, hexane/*i*-PrOH = 95/5, 1.0 mL/min,  $\lambda$  = 214 nm,  $t_R$ (minor) = 27.3 min,  $t_R$ (major) = 29.6 min);  $[\alpha]_D^{20}$  = -38.9 ( $c$  = 1.35, CHCl<sub>3</sub>); <sup>1</sup>H NMR (300 MHz, CDCl<sub>3</sub>)  $\delta$  5.89 (t,  $J$  = 5.4 Hz, 1 H), 5.27-5.13 (m, 3 H), 5.02-4.85 (m, 2 H), 4.62 (d,  $J$  = 8.1 Hz, 1 H), 4.34-4.24 (m, 1 H), 4.18-4.07 (m, 1 H), 3.61-3.40 (m, 3 H), 2.23-2.11 (m, 2 H), 2.06 (s, 3 H, Me), 2.05 (s, 3 H, Me), 2.00 (s, 3 H, Me), 2.10-1.95 (m, 1 H, CH), 1.82-1.54 (m, 7 H, CH<sub>2</sub>  $\times$  3 and one proton of CH<sub>2</sub>), 1.39-1.00 (m, 13 H, CH<sub>2</sub>  $\times$  6 and one proton of CH<sub>2</sub>), 0.88 (t,  $J$  = 6.6 Hz, 3 H, Me); <sup>13</sup>C NMR (75 Hz, CDCl<sub>3</sub>)  $\delta$  204.3, 173.1, 170.1, 169.5, 169.2, 99.2, 98.3, 88.3, 72.7, 72.4, 71.1, 68.7, 68.4, 38.8, 36.7, 36.5, 32.9, 32.7, 31.5, 29.1, 28.9, 25.9, 25.7, 25.4, 22.5, 20.52, 20.47, 13.9; IR (neat)  $\nu$  (cm<sup>-1</sup>) 3312, 2926, 2853, 1961, 1760, 1651, 1538, 1447, 1373, 1248, 1220, 1165, 1050; MS (ESI, m/z) 604 (M+K<sup>+</sup>), 588 (M+Na<sup>+</sup>), 566 (M+H<sup>+</sup>); Anal. Calcd. for C<sub>30</sub>H<sub>47</sub>NO<sub>9</sub> (%): C 63.70, H 8.37, N 2.48; Found: C 63.60, H 8.39, N 2.29.

## 11. Preparation of (*R<sub>a</sub>*)-4de. hx-10-76

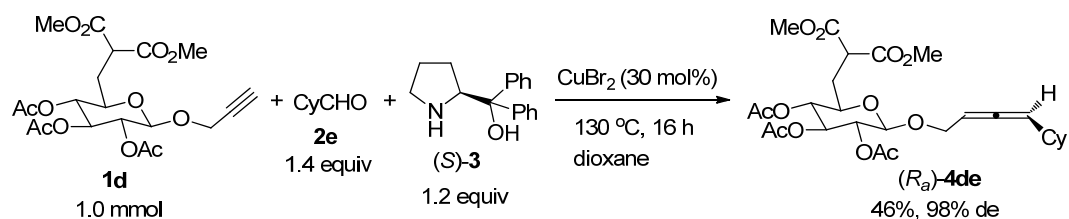

The reaction of CuBr<sub>2</sub> (67.0 mg, 0.3 mmol), **1d** (457.3 mg, 1.0 mmol), (*S*)-**3** (304.0 mg, 1.2 mmol), and **2e** (157.3 mg, 1.4 mmol) in dioxane (3.0 mL) afforded (*R<sub>a</sub>*)-**4de** (255.0 mg, 46%) (eluent: petroleum ether/ethyl acetate = 2.5/1) as a liquid: 98% de (HPLC conditions: Chiralcel AD-H column, hexane/*i*-PrOH = 80/20, 0.5 mL/min,  $\lambda = 214$  nm,  $t_R(\text{minor}) = 12.2$  min,  $t_R(\text{major}) = 14.3$  min);  $[\alpha]_D^{20} = -30.0$  ( $c = 1.375$ , CHCl<sub>3</sub>); <sup>1</sup>H NMR (300 MHz, CDCl<sub>3</sub>)  $\delta$  5.26-5.12 (m, 3 H), 4.96 (dd,  $J_1 = 9.8$  Hz,  $J_2 = 8.0$  Hz, 1 H), 4.88 (t,  $J = 9.5$  Hz, 1 H), 4.52 (d,  $J = 8.1$  Hz, 1 H), 4.25 (ddd,  $J_1 = 11.4$  Hz,  $J_2 = 6.3$  Hz,  $J_3 = 2.7$  Hz, 1 H), 4.06 (ddd,  $J_1 = 11.7$  Hz,  $J_2 = 7.5$  Hz,  $J_3 = 2.4$  Hz, 1 H), 3.76 (s, 3 H, Me), 3.74 (s, 3 H, Me), 3.67 (dd,  $J_1 = 9.6$  Hz,  $J_2 = 5.1$  Hz, 1 H), 3.52 (td,  $J_1 = 9.6$  Hz,  $J_2 = 2.9$  Hz, 1 H, CH), 2.30-2.19 (m, 1 H), 2.13-1.94 (m, 11 H), 1.81-1.60 (m, 5 H, CH<sub>2</sub>  $\times$  2 and one proton of CH<sub>2</sub>), 1.40-1.00 (m, 5 H, CH<sub>2</sub>  $\times$  2 and one proton of CH<sub>2</sub>); <sup>13</sup>C NMR (75 Hz, CDCl<sub>3</sub>)  $\delta$  204.1, 170.1, 169.5, 169.2, 169.1, 169.0, 99.2, 98.1, 88.3, 72.6, 71.6, 71.1, 71.0, 68.1, 52.6, 52.5, 47.4, 36.6, 32.8, 32.7, 30.2, 25.9, 25.7, 20.52, 20.49, 20.4; IR (neat)  $\nu$  (cm<sup>-1</sup>) 2927, 2852, 1961, 1755, 1436, 1367, 1245, 1218, 1159, 1046; MS (ESI,  $m/z$ ) 577 (M+Na<sup>+</sup>), 572 (M+NH<sub>4</sub><sup>+</sup>); Anal. Calcd. for C<sub>27</sub>H<sub>38</sub>O<sub>12</sub> (%): C 58.47, H 6.91; Found: C 58.04, H 6.68. HRMS calcd. for C<sub>27</sub>H<sub>42</sub>NO<sub>12</sub> (M+NH<sub>4</sub><sup>+</sup>): 572.2702; Found: 572.2688.

## 12. Preparation of (*R<sub>a</sub>*)-4ee. hx-10-75

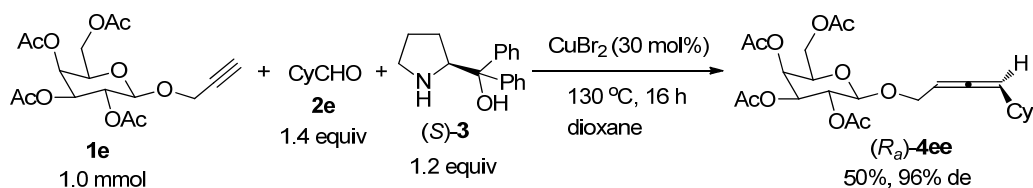

The reaction of  $\text{CuBr}_2$  (67.3 mg, 0.3 mmol), **1e** (388.0 mg, 1.0 mmol), (*S*)-**3** (303.7 mg, 1.2 mmol), and **2e** (158.0 mg, 1.4 mmol) in dioxane (3.0 mL) afforded (*R<sub>a</sub>*)-**4ee** (240.3 mg, 50%) (eluent: petroleum ether/ethyl acetate = 3/1) as a liquid: 96% de (HPLC conditions: Chiralcel AD-H column, hexane/*i*-PrOH = 95/5, 1.0 mL/min,  $\lambda = 214$  nm,  $t_{\text{R}}$ (major) = 20.0 min,  $t_{\text{R}}$ (minor) = 23.5 min);  $[\alpha]_{\text{D}}^{20} = -26.7$  ( $c = 1.24$ ,  $\text{CHCl}_3$ );  $^1\text{H NMR}$  (300 MHz,  $\text{CDCl}_3$ )  $\delta$  5.40 (d,  $J = 3.0$  Hz, 1 H), 5.27-5.13 (m, 3 H), 5.02 (dd,  $J_1 = 10.4$  Hz,  $J_2 = 3.2$  Hz, 1 H), 4.62 (d,  $J = 8.1$  Hz, 1 H), 4.37-4.27 (m, 1 H), 4.23-4.07 (m, 3 H), 3.89 (t,  $J = 6.6$  Hz, 1 H), 2.16 (s, 3 H, Me), 2.09 (s, 3 H, Me), 2.06 (s, 3 H, Me), 1.99 (s, 3 H, Me), 2.20-1.93 (m, 1 H, CH), 1.83-1.60 (m, 5 H,  $\text{CH}_2 \times 2$  and one proton of  $\text{CH}_2$ ), 1.40-0.99 (m, 5 H,  $\text{CH}_2 \times 2$  and one proton of  $\text{CH}_2$ );  $^{13}\text{C NMR}$  (75 Hz,  $\text{CDCl}_3$ )  $\delta$  204.3, 170.12, 170.09, 170.0, 169.2, 99.2, 98.0, 88.2, 70.8, 70.4, 68.6, 67.8, 66.8, 61.1, 36.6, 32.8, 32.6, 25.8, 25.7, 20.5, 20.43, 20.36; IR (neat) ( $\text{cm}^{-1}$ ) 2926, 2852, 1961, 1754, 1449, 1370, 1223, 1170, 1132, 1075, 1057; MS (ESI,  $m/z$ ) 505 ( $\text{M}+\text{Na}^+$ ), 500 ( $\text{M}+\text{NH}_4^+$ ); Anal. Calcd. for  $\text{C}_{24}\text{H}_{34}\text{O}_{10}$  (%): C 59.74 H 7.10; Found: C 59.77, H 6.97.

### 13. Preparation of (*R<sub>a</sub>*)-**4lb**. hx-12-190

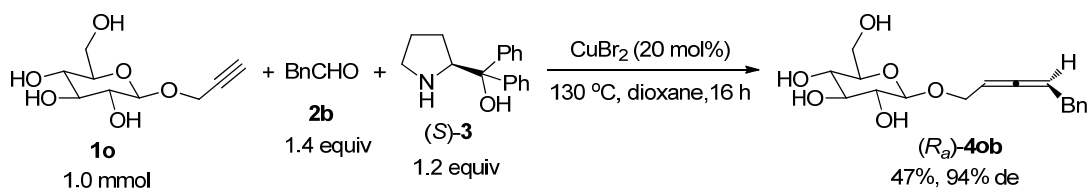

To a flame-dried Schlenk tube were added  $\text{CuBr}_2$  (44.8 mg, 0.2 mmol), **1o** (221.3



mg, 1.0 mmol), (*S*)-**3** (304.2 mg, 1.2 mmol), and **2b** (168.7 mg, 1.4 mmol)/dioxane (3.0 mL) sequentially under nitrogen atmosphere. The Schlenk tube was then equipped with a condenser and the outlet connected to the vacuum line with a nitrogen flow was closed (For an apparatus, see Fig.1 in SI). The reaction was complete after being stirred at 130 °C for 16 h as monitored by TLC (eluent: EtOAc/MeOH = 6/1). After cooling to room temperature, the crude reaction mixture was filtrated through a short pad of silica gel eluted with MeOH (30 mL). After evaporation, the residue was purified by chromatography on silica gel to afford (*R<sub>a</sub>*)-**4ob** (152.0 mg, 47%) (eluent: EtOAc/MeOH = 8/1) as a syrup: 94% de (HPLC conditions: Chiralcel OJ column, hexane/*i*-PrOH = 80/20, 1.0 mL/min,  $\lambda$  = 214 nm,  $t_{R}(\text{major})$  = 9.1 min,  $t_{R}(\text{minor})$  = 19.0 min);  $[\alpha]_{D}^{20}$  = -36.2 ( $c$  = 0.79, MeOH);  $^1\text{H}$  NMR (300 MHz,  $d_6$ -DMSO)  $\delta$  7.44-7.13 (m, 5 H, ArH), 5.53-5.42 (m, 1 H), 5.42-5.31 (m, 1 H), 5.13-4.92 (m, 3 H), 4.60 (t,  $J$  = 5.6 Hz, 1 H), 4.35-4.19 (m, 2 H), 4.17-4.04 (m, 1 H), 3.71 (dd,  $J_1$  = 11.3 Hz,  $J_2$  = 5.6 Hz, 1 H), 3.56-3.31 (m, 3 H), 3.27-2.95 (m, 4 H);  $^{13}\text{C}$  NMR (75 Hz,  $d_6$ -DMSO)  $\delta$  205.6, 140.8, 129.38, 129.35, 127.2, 102.6, 92.3, 89.9, 77.9, 77.7, 74.4, 71.0, 67.2, 62.0, 35.6; IR (neat)  $\nu$  ( $\text{cm}^{-1}$ ) 3389, 3027, 2971, 2920, 2881, 1965, 1602, 1494, 1453, 1417, 1354, 1273, 1156, 1077, 1046, 1025; MS (ESI,  $m/z$ ) 367 ( $M+\text{COOH}$ ); HRMS calcd. for  $\text{C}_{17}\text{H}_{22}\text{O}_6^{35}\text{Cl}$  ( $M+(\text{}^{35}\text{Cl})$ ): 357.1110; Found: 357.1109.

#### 14. Preparation of (*R<sub>a</sub>*)-**4fe**. hx-10-55

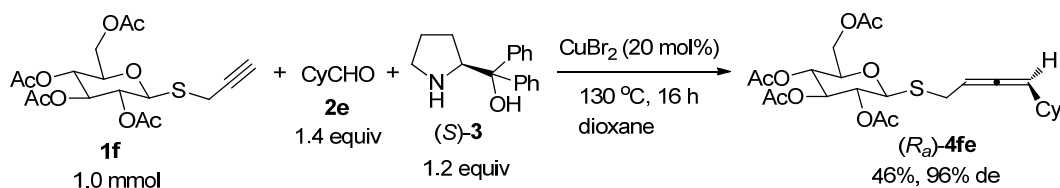

The reaction of  $\text{CuBr}_2$  (44.9 mg, 0.2 mmol), **1f** (400.8 mg, 1.0 mmol), **(*S*)-3** (304.6 mg, 1.2 mmol), and **2e** (157.2 mg, 1.4 mmol) in dioxane (3.0 mL) afforded **(*R<sub>a</sub>*)-4fe** (230.3 mg, 46%) (eluent: petroleum ether/ethyl acetate = 3/1) as a solid: 96% de (HPLC conditions: Chiralcel AS-H column, hexane/*i*-PrOH = 95/5, 0.5 mL/min,  $\lambda = 214$  nm,  $t_{\text{R}}(\text{minor}) = 23.0$  min,  $t_{\text{R}}(\text{major}) = 24.5$  min);  $[\alpha]_{\text{D}}^{20} = -47.9$  ( $c = 1.24$ ,  $\text{CHCl}_3$ ); m.p. 103-104 °C (EtOAc/*n*-hexane);  $^1\text{H}$  NMR (300 MHz,  $\text{CDCl}_3$ )  $\delta$  5.27-5.14 (m, 3 H), 5.14-5.01 (m, 2 H), 4.58 (d,  $J = 9.9$  Hz, 1 H), 4.25 (dd,  $J_1 = 12.5$  Hz,  $J_2 = 5.0$  Hz, 1 H), 4.13 (dd,  $J_1 = 12.2$  Hz,  $J_2 = 2.0$  Hz, 1 H), 3.71-3.62 (m, 1 H), 3.35 (ddd,  $J_1 = 13.8$  Hz,  $J_2 = 7.5$  Hz,  $J_3 = 2.3$  Hz, 1 H), 3.24 (ddd,  $J_1 = 13.8$  Hz,  $J_2 = 6.5$  Hz,  $J_3 = 3.0$  Hz, 1 H), 2.08 (s, 3 H, Me), 2.07 (s, 3 H, Me), 2.03 (s, 3 H, Me), 2.02 (s, 3 H, Me), 2.12-1.94 (m, 1 H, CH), 1.82-1.60 (m, 5 H,  $\text{CH}_2 \times 2$  and one proton of  $\text{CH}_2$ ), 1.40-1.00 (m, 5 H,  $\text{CH}_2 \times 2$  and one proton of  $\text{CH}_2$ );  $^{13}\text{C}$  NMR (75 Hz,  $\text{CDCl}_3$ )  $\delta$  203.7, 170.5, 170.0, 169.2, 98.5, 88.8, 82.7, 75.7, 73.8, 69.7, 68.1, 61.9, 37.2, 33.0, 32.9, 30.1, 25.9, 25.7, 20.6, 20.5, 20.4; IR (KBr)  $\nu$  ( $\text{cm}^{-1}$ ) 2926, 2852, 1953, 1756, 1448, 1371, 1225, 1040; MS (ESI,  $m/z$ ) 516 ( $\text{M}+\text{NH}_4^+$ ); Anal. Calcd. for  $\text{C}_{24}\text{H}_{34}\text{O}_9\text{S}$  (%): C 57.81, H 6.87; Found: C 58.03, H 6.82.

## 15. Preparation of (*R<sub>a</sub>*)-4ge.

### (1) Preparation of (*R<sub>a</sub>*)-4ge with $\text{CuBr}_2$ 20 mol%. hx-10-77

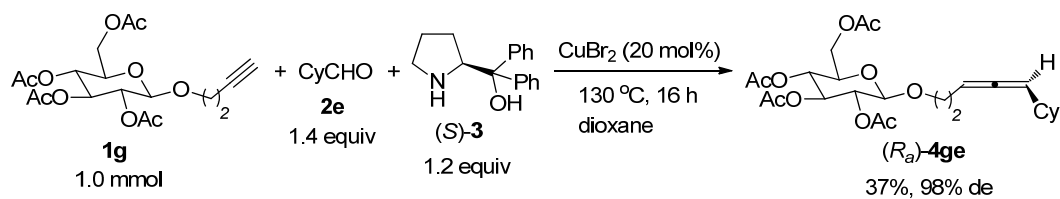

The reaction of  $\text{CuBr}_2$  (44.7 mg, 0.2 mmol), **1g** (402.0 mg, 1.0 mmol), (*S*)-**3** (306.1 mg, 1.2 mmol), and **2e** (157.2 mg, 1.4 mmol) in dioxane (3.0 mL) afforded (*R<sub>a</sub>*)-**4ge** (183.2 mg, 37%) (eluent: petroleum ether/ethyl acetate = 2.5/1) as a solid: 98% de (HPLC conditions: Chiralcel IC column, hexane/*i*-PrOH = 96/4, 0.4 mL/min,  $\lambda = 214$  nm,  $t_{\text{R}}(\text{minor}) = 76.6$  min,  $t_{\text{R}}(\text{major}) = 78.3$  min);  $[\alpha]_{\text{D}}^{20} = -47.8$  ( $c = 1.38$ ,  $\text{CHCl}_3$ ); m.p. 86-87 °C (DCM/*n*-hexane);  $^1\text{H}$  NMR (300 MHz,  $\text{CDCl}_3$ )  $\delta$  5.21 (t,  $J = 9.5$  Hz, 1 H), 5.14-4.94 (m, 4 H), 4.53 (d,  $J = 8.1$  Hz, 1 H), 4.28 (dd,  $J_1 = 12.3$  Hz,  $J_2 = 4.8$  Hz, 1 H), 4.13 (dd,  $J_1 = 12.3$  Hz,  $J_2 = 2.4$  Hz, 1 H), 3.92 (dt,  $J_1 = 9.6$  Hz,  $J_2 = 6.9$  Hz, 1 H), 3.71 (ddd,  $J_1 = 10.1$  Hz,  $J_2 = 4.8$  Hz,  $J_3 = 2.4$  Hz, 1 H), 3.55 (dt,  $J_1 = 9.6$  Hz,  $J_2 = 7.2$  Hz, 1 H), 2.32-2.20 (m, 2 H,  $\text{CH}_2$ ), 2.09 (s, 3 H, Me), 2.05 (s, 3 H, Me), 2.03 (s, 3 H, Me), 2.01 (s, 3 H, Me), 2.13-1.88 (m, 1 H, CH), 1.80-1.58 (m, 5 H,  $\text{CH}_2 \times 2$  and one proton of  $\text{CH}_2$ ), 1.37-0.97 (m, 5 H,  $\text{CH}_2 \times 2$  and one proton of  $\text{CH}_2$ );  $^{13}\text{C}$  NMR (75 Hz,  $\text{CDCl}_3$ )  $\delta$  203.2, 170.6, 170.2, 169.3, 169.2, 100.7, 97.4, 87.4, 72.7, 71.6, 71.1, 69.7, 68.2, 61.8, 36.9, 32.9, 32.8, 29.3, 26.0, 25.8, 20.6, 20.5, 20.4; IR (KBr)  $\nu$  ( $\text{cm}^{-1}$ ) 2926, 2852, 1959, 1757, 1448, 1369, 1225, 1170, 1040; MS (ESI,  $m/z$ ) 514 ( $\text{M}+\text{NH}_4^+$ ); Anal. Calcd. for  $\text{C}_{25}\text{H}_{36}\text{O}_{10}$  (%): C 60.47, H 7.31; Found: C 60.54, H 7.25.

**(2) Preparation of (*R<sub>a</sub>*)-4ge with  $\text{CuBr}_2$  30 mol%. hx-10-78**

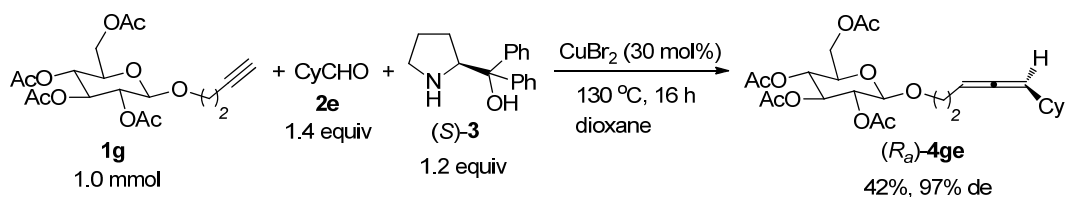

The reaction of  $\text{CuBr}_2$  (67.4 mg, 0.3 mmol), **1g** (400.6 mg, 1.0 mmol),  $(S)\text{-3}$  (305.2 mg, 1.2 mmol), and **2e** (157.1 mg, 1.4 mmol) in dioxane (3.0 mL) afforded  $(R_a)\text{-4ge}$  (210.4 mg, 42%) (eluent: petroleum ether/ethyl acetate = 2.5/1) as a solid: 97% de (HPLC conditions: Chiralcel IC column, hexane/*i*-PrOH = 96/4, 0.4 mL/min,  $\lambda = 214\text{ nm}$ ,  $t_{\text{R}}(\text{minor}) = 75.4\text{ min}$ ,  $t_{\text{R}}(\text{major}) = 77.0\text{ min}$ );  $[\alpha]_{\text{D}}^{20} = -47.2$  ( $c = 1.153$ ,  $\text{CHCl}_3$ );  $^1\text{H NMR}$  (300 MHz,  $\text{CDCl}_3$ )  $\delta$  5.21 (t,  $J = 9.5\text{ Hz}$ , 1 H), 5.14-4.94 (m, 4 H), 4.53 (d,  $J = 7.8\text{ Hz}$ , 1 H), 4.28 (dd,  $J_1 = 12.3\text{ Hz}$ ,  $J_2 = 4.5\text{ Hz}$ , 1 H), 4.13 (dd,  $J_1 = 12.3\text{ Hz}$ ,  $J_2 = 2.4\text{ Hz}$ , 1 H), 3.92 (dt,  $J_1 = 9.6\text{ Hz}$ ,  $J_2 = 6.9\text{ Hz}$ , 1 H), 3.71 (ddd,  $J_1 = 9.5\text{ Hz}$ ,  $J_2 = 4.7\text{ Hz}$ ,  $J_3 = 2.4\text{ Hz}$ , 1 H), 3.55 (dt,  $J_1 = 9.6\text{ Hz}$ ,  $J_2 = 7.4\text{ Hz}$ , 1 H), 2.32-2.20 (m, 2 H,  $\text{CH}_2$ ), 2.09 (s, 3 H, Me), 2.05 (s, 3 H, Me), 2.03 (s, 3 H, Me), 2.01 (s, 3 H, Me), 2.13-1.87 (m, 1 H, CH), 1.80-1.58 (m, 5 H,  $\text{CH}_2 \times 2$  and one proton of  $\text{CH}_2$ ), 1.37-0.97 (m, 5 H,  $\text{CH}_2 \times 2$  and one proton of  $\text{CH}_2$ );  $^{13}\text{C NMR}$  (75 Hz,  $\text{CDCl}_3$ )  $\delta$  203.2, 170.6, 170.2, 169.3, 169.2, 100.7, 97.4, 87.4, 72.7, 71.6, 71.1, 69.7, 68.3, 61.8, 36.9, 32.93, 32.85, 29.3, 26.0, 25.8, 20.6, 20.54, 20.49, 20.47.

## 16. Preparation of $(R_a)\text{-4he}$ . hx-10-58, hx-8-81

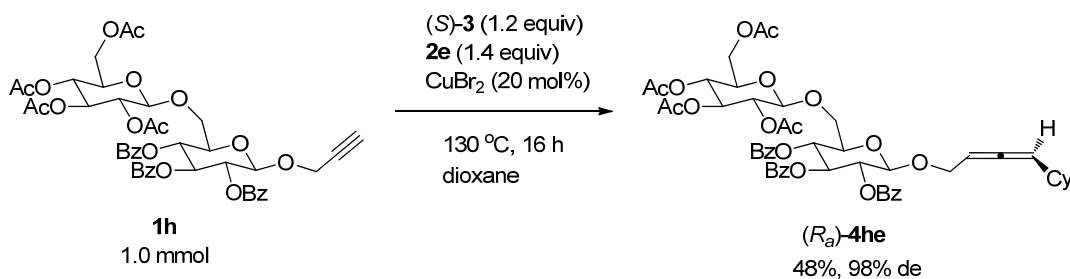

The reaction of  $\text{CuBr}_2$  (44.9 mg, 0.2 mmol), **1h** (862.1 mg, 1.0 mmol),  $(S)\text{-3}$

(304.4 mg, 1.2 mmol), and **2e** (157.5 mg, 1.4 mmol) in dioxane (3.0 mL) afforded (*R*)-**4he** (456.7 mg, 48%) (eluent: petroleum ether/ethyl acetate = 1.5/1) as a syrup: 98% de (HPLC conditions: (Supercritical Fluid Chromatography) Chiralcel IA column, CO<sub>2</sub>/*i*-PrOH = 80/20, 1.5 mL/min,  $\lambda$  = 214 nm,  $t_R$ (minor) = 8.3 min,  $t_R$ (major) = 14.2 min);  $[\alpha]_D^{20}$  = -13.8 ( $c$  = 1.21, CHCl<sub>3</sub>); <sup>1</sup>H NMR (300 MHz, CDCl<sub>3</sub>)  $\delta$  7.98-7.88 (m, 4 H, ArH), 7.84-7.78 (m, 2 H, ArH), 7.55-7.45 (m, 2 H, ArH), 7.43-7.32 (m, 5 H, ArH), 7.28-7.20 (m, 2 H, ArH), 5.88 (t,  $J$  = 9.6 Hz, 1 H), 5.51 (dd,  $J_1$  = 9.6 Hz,  $J_2$  = 8.1 Hz, 1 H), 5.41 (t,  $J$  = 9.8 Hz, 1 H), 5.26-5.12 (m, 3 H), 5.11-4.98 (m, 2 H), 4.94 (d,  $J$  = 7.8 Hz, 1 H), 4.65 (d,  $J$  = 7.8 Hz, 1 H), 4.43-4.33 (m, 1 H), 4.29-4.12 (m, 2 H), 4.10-3.97 (m, 3 H), 3.78 (dd,  $J$  = 18.8 Hz,  $J$  = 11.3 Hz, 1 H), 3.74-3.65 (m, 1 H), 2.09 (s, 3 H, Me), 2.01 (s, 3 H, Me), 2.00 (s, 3 H, Me), 1.99 (s, 3 H, Me), 2.12-1.85 (m, 1 H, CH), 1.79-1.57 (m, 5 H, CH<sub>2</sub>  $\times$  2 and one proton of CH<sub>2</sub>), 1.34-0.95 (m, 5 H, CH<sub>2</sub>  $\times$  2 and one proton of CH<sub>2</sub>); <sup>13</sup>C NMR (75 Hz, CDCl<sub>3</sub>)  $\delta$  204.1, 170.3, 170.0, 169.2, 169.1, 165.5, 165.1, 164.8, 133.4, 133.02, 132.99, 129.6, 129.54, 129.47, 129.1, 128.5, 128.4, 128.3, 128.11, 128.05, 100.6, 99.2, 98.2, 88.2, 73.5, 72.8, 72.6, 71.6, 71.5, 70.9, 69.5, 68.2, 68.0, 67.7, 61.6, 36.5, 32.8, 32.5, 25.8, 25.7, 25.6, 20.5, 20.4, 20.3; IR (neat)  $\nu$  (cm<sup>-1</sup>) 3063, 2927, 2852, 1959, 1754, 1739, 1602, 1452, 1369, 1284, 1251, 1224, 1176, 1094, 1069, 1037; MS (MALDI,  $m/z$ ) 995 (M+K<sup>+</sup>) 979 (M+Na<sup>+</sup>); Anal. Calcd. for C<sub>51</sub>H<sub>56</sub>O<sub>18</sub> (%): C 64.01, H 5.90; Found: C 64.00, H 5.80.

#### 17. Preparation of (*R<sub>a</sub>*)-**4ie**. hx-10-70, hx-8-98

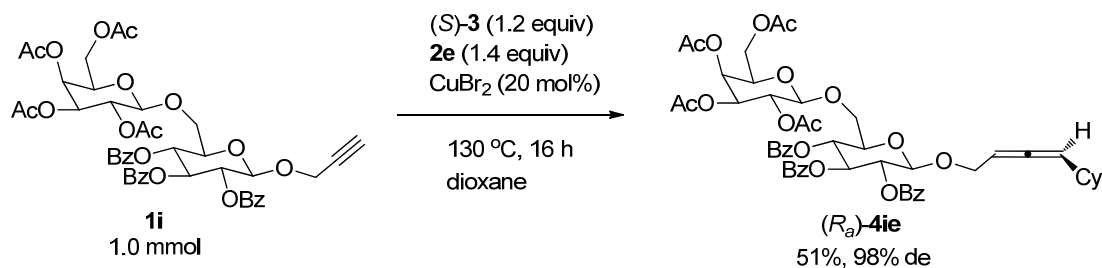

The reaction of  $\text{CuBr}_2$  (45.0 mg, 0.2 mmol),  $1\mathbf{i}$  (861.1 mg, 1.0 mmol),  $(S)\text{-3}$  (304.2 mg, 1.2 mmol), and  $2\mathbf{e}$  (157.2 mg, 1.4 mmol) in dioxane (3.0 mL) afforded  $(R_a)\text{-4ie}$  (492.2 mg, 51%) (eluent: petroleum ether/ethyl acetate = 1.5/1) as a syrup: 98% de (HPLC conditions: (Supercritical Fluid Chromatography) Chiralcel IA column,  $\text{CO}_2/i\text{-PrOH} = 70/30$ , 1.5 mL/min,  $\lambda = 214$  nm,  $t_{\text{R}}(\text{minor}) = 4.5$  min,  $t_{\text{R}}(\text{major}) = 6.1$  min);  $[\alpha]_{\text{D}}^{20} = -13.5$  ( $c = 1.12$ ,  $\text{CHCl}_3$ );  $^1\text{H NMR}$  (300 MHz,  $\text{CDCl}_3$ )  $\delta$  7.80-7.88 (m, 4 H, ArH), 7.85-7.78 (m, 2 H, ArH), 7.55-7.20 (m, 9 H, ArH), 5.88 (t,  $J = 9.8$  Hz, 1 H), 5.51 (dd,  $J_1 = 9.8$  Hz,  $J_2 = 8.0$  Hz, 1 H), 5.46-5.36 (m, 2 H), 5.26 (dd,  $J_1 = 10.4$  Hz,  $J_2 = 8.0$  Hz, 1 H), 5.20-5.12 (m, 2 H), 5.03 (dd,  $J_1 = 10.4$  Hz,  $J_2 = 3.5$  Hz, 1 H), 4.95 (d,  $J = 7.8$  Hz, 1 H), 4.62 (d,  $J = 7.8$  Hz, 1 H), 4.44-4.34 (m, 1 H), 4.25-3.97 (m, 5 H), 3.92 (t,  $J = 6.5$  Hz, 1 H), 3.79 (dd,  $J_1 = 10.8$  Hz,  $J_2 = 7.5$  Hz, 1 H), 2.110 (s, 3 H, Me), 2.107 (s, 3 H, Me), 2.01 (s, 3 H, Me), 1.98 (s, 3 H, Me), 2.18-1.85 (m, 1 H, CH), 1.79-1.57 (m, 5 H,  $\text{CH}_2 \times 2$  and one proton of  $\text{CH}_2$ ), 1.34-0.95 (m, 5 H,  $\text{CH}_2 \times 2$  and one proton of  $\text{CH}_2$ );  $^{13}\text{C NMR}$  (75 Hz,  $\text{CDCl}_3$ )  $\delta$  204.1, 170.1, 170.0, 169.9, 169.2, 165.5, 165.1, 164.8, 133.4, 133.02, 132.98, 129.5, 129.4, 129.0, 128.5, 128.4, 128.3, 128.1, 128.0, 101.0, 99.2, 98.2, 88.2, 73.5, 72.8, 71.5, 70.7, 70.4, 69.5, 68.4, 68.2, 67.7, 66.8, 61.0, 36.4, 32.8, 32.5, 25.8, 25.7, 25.6, 20.6, 20.4, 20.33, 20.28; IR (neat)  $\nu$  ( $\text{cm}^{-1}$ ) 3066, 2927, 2852, 1959, 1740, 1602, 1451, 1370, 1281, 1255, 1218, 1177, 1090, 1069; MS (MALDI,  $m/z$ ) 979 ( $\text{M}+\text{Na}^+$ ); Anal. Calcd. for  $\text{C}_{51}\text{H}_{56}\text{O}_{18}$  (%): C

64.01, H 5.90; Found: C 64.04, H 5.88.

### 18. Preparation of (*R<sub>a</sub>*,*R<sub>a</sub>*)-**4jb**. xc-13-61

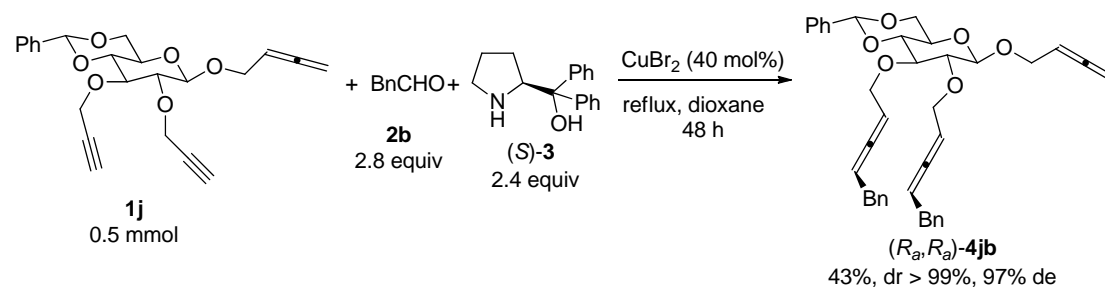

The reaction of  $\text{CuBr}_2$  (45.1 mg, 0.2 mmol), **1j** (198.1 mg, 0.5 mmol), (*S*)-**3** (303.9 mg, 1.2 mmol), and **2b** (168.0 mg, 1.4 mmol) in dioxane (1.5 mL) afforded (*R<sub>a</sub>*,*R<sub>a</sub>*)-**4jb** (131.2 mg, 43%) (eluent: petroleum ether/ethyl acetate = 10/1) as an oil: dr > 99%, 97% de (HPLC conditions: (Supercritical Fluid Chromatography) Chiralcel OJ column,  $\text{CO}_2/i\text{-PrOH}$  = 80/20, 1.3 mL/min,  $\lambda$  = 214 nm,  $t_{\text{R}}(\text{minor})$  = 24.7 min,  $t_{\text{R}}(\text{major})$  = 27.1 min);  $[\alpha]_{\text{D}}^{20}$  = -69.8 ( $c$  = 0.97,  $\text{CHCl}_3$ );  $^1\text{H}$  NMR (300 MHz,  $\text{CDCl}_3$ )  $\delta$  7.55-7.42 (m, 2 H, ArH), 7.41-7.08 (m, 13 H, ArH), 5.53 (s, 1 H), 5.43-5.18 (m, 5 H), 4.89-4.72 (m, 2 H), 4.50 (d,  $J$  = 7.8 Hz, 1 H, CH), 4.44-4.11 (m, 7 H), 3.76 (t,  $J$  = 10.2 Hz, 1 H), 3.66-3.50 (m, 2 H), 3.43-3.24 (m, 6 H);  $^{13}\text{C}$  NMR (75 Hz,  $\text{CDCl}_3$ )  $\delta$  209.4, 205.2, 205.1, 140.03, 140.01, 137.2, 128.9, 128.4, 128.2, 126.2, 126.1, 126.0, 102.7, 101.0, 91.2, 89.4, 89.3, 87.2, 81.3, 80.8, 80.1, 76.1, 71.3, 71.2, 68.7, 67.6, 66.0, 35.33, 35.28; IR (neat)  $\nu$  ( $\text{cm}^{-1}$ ) 3062, 3027, 2982, 2871, 1959, 1602, 1494, 1453, 1379, 1363, 1275, 1261, 1174, 1085, 1043, 1000; MS (ESI,  $m/z$ ) 643 ( $\text{M}+\text{K}^+$ ), 627 ( $\text{M}+\text{Na}^+$ ); HRMS calcd for  $\text{C}_{39}\text{H}_{40}\text{O}_6\text{Na}$  ( $\text{M}+\text{Na}^+$ ): 627.2717, found: 627.2717.

### 19. Preparation of (*R<sub>a</sub>*)-**4ka**. hx-12-139

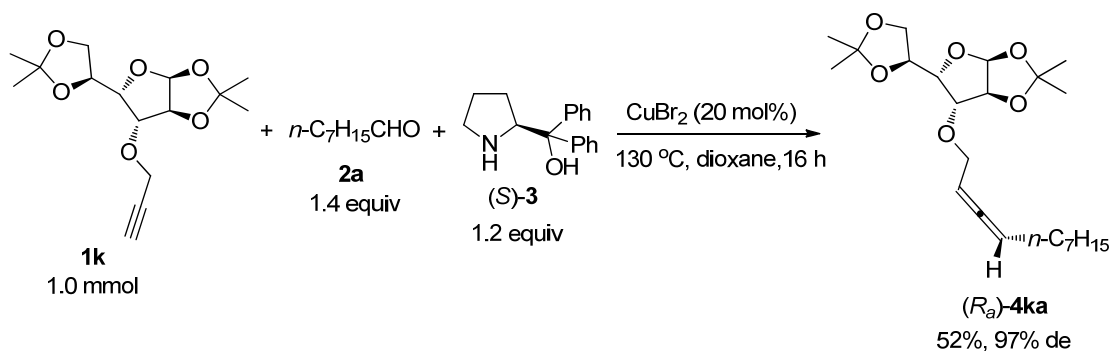

The reaction of  $\text{CuBr}_2$  (45.0 mg, 0.2 mmol), **1k** (301.2 mg, 1.0 mmol), **(*S*)-3** (304.7 mg, 1.2 mmol), and **2a** (179.8 mg, 1.4 mmol) in dioxane (3.0 mL) afforded **(*R<sub>a</sub>*)-4ka** (214.5 mg, 52%) (eluent: petroleum ether/ethyl acetate = 20/1) as a liquid: 97% de (HPLC conditions: Chiralcel OZ-H column, hexane/*i*-PrOH = 300/1, 1.0 mL/min,  $\lambda = 214$  nm,  $t_{\text{R}}(\text{minor}) = 12.4$  min,  $t_{\text{R}}(\text{major}) = 14.3$  min);  $[\alpha]_{\text{D}}^{20} = -43.2$  ( $c = 1.09$ ,  $\text{CHCl}_3$ );  $^1\text{H NMR}$  (300 MHz,  $\text{CDCl}_3$ )  $\delta$  5.88 (d,  $J = 3.9$  Hz, 1 H), 5.29-5.12 (m, 2 H), 4.55 (d,  $J = 3.6$  Hz, 1 H), 4.34-4.25 (m, 1 H), 4.19-4.03 (m, 4 H), 4.03-3.95 (m, 2 H), 2.02 (ddd,  $J_1 = 14.1$  Hz,  $J_2 = 6.9$  Hz,  $J_3 = 3.0$  Hz, 2 H,  $\text{CH}_2$ ), 1.49 (s, 3 H, Me), 1.43 (s, 3 H, Me), 1.35 (s, 3 H, Me), 1.31 (s, 3 H, Me), 1.47-1.20 (m, 10 H,  $\text{CH}_2 \times 5$ ), 0.88 (t,  $J = 6.6$  Hz, 3 H, Me);  $^{13}\text{C NMR}$  (75 Hz,  $\text{CDCl}_3$ )  $\delta$  205.0, 111.6, 108.7, 105.1, 92.2, 88.0, 82.7, 81.0, 80.8, 72.5, 68.9, 67.0, 31.7, 29.0, 28.9, 28.4, 26.73, 26.68, 26.1, 25.3, 22.5, 14.0; IR (neat)  $\nu$  ( $\text{cm}^{-1}$ ) 2986, 2929, 2856, 1963, 1456, 1381, 1372, 1346, 1253, 1216, 1166, 1119, 1078, 1023; MS(EI):  $m/z$  (%) 410 ( $\text{M}^+$ , 3.2), 101 (100), 43 (100); HRMS calcd for  $\text{C}_{23}\text{H}_{38}\text{O}_6$  [ $\text{M}^+$ ]: 410.2668, found: 410.2667.

## 20. Preparation of (*R<sub>a</sub>*)-4ke. hx-12-171



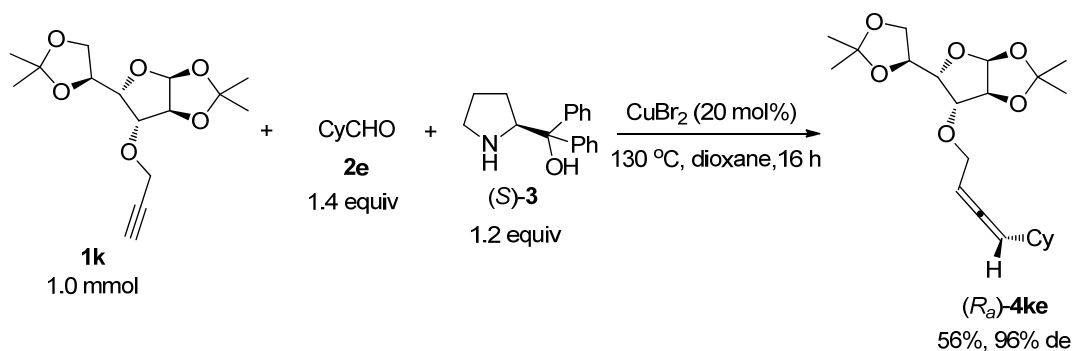

The reaction of  $\text{CuBr}_2$  (44.8 mg, 0.2 mmol), **1k** (298.6 mg, 1.0 mmol),  $(S)\text{-3}$  (303.8 mg, 1.2 mmol), and **2e** (157.1 mg, 1.4 mmol) in dioxane (3.0 mL) afforded  $(R_a)\text{-4ke}$  (220.6 mg, 56%) (eluent: petroleum ether/ethyl acetate = 20/1 to 10/1) as a liquid: 96% de (HPLC conditions: Chiralcel OZ-H column, hexane/*i*-PrOH = 100/1, 0.3 mL/min,  $\lambda = 214\text{ nm}$ ,  $t_{\text{R}}(\text{minor}) = 26.4\text{ min}$ ,  $t_{\text{R}}(\text{major}) = 28.2\text{ min}$ );  $[\alpha]_{\text{D}}^{20} = -63.8$  ( $c = 0.94$ ,  $\text{CHCl}_3$ );  $^1\text{H NMR}$  (300 MHz,  $\text{CDCl}_3$ )  $\delta$  5.88 (d,  $J = 3.6\text{ Hz}$ , 1 H), 5.29-5.17 (m, 2 H), 4.56 (d,  $J = 3.6\text{ Hz}$ , 1 H), 4.35-4.25 (m, 1 H), 4.20-3.95 (m, 6 H), 2.10-1.92 (m, 1 H, CH), 1.84-1.57 (m, 5 H, five protons from Cy), 1.50 (s, 3 H, Me), 1.43 (s, 3 H, Me), 1.35 (s, 3 H, Me), 1.31 (s, 3 H, Me), 1.39-1.00 (m, 5 H, five protons from Cy);  $^{13}\text{C NMR}$  (75 Hz,  $\text{CDCl}_3$ )  $\delta$  203.9, 111.5, 108.6, 105.1, 98.1, 88.8, 82.6, 80.9, 80.8, 72.4, 69.0, 67.0, 36.7, 32.8, 26.7, 26.6, 26.1, 25.9, 25.8, 25.2; IR (neat)  $\nu$  ( $\text{cm}^{-1}$ ) 2986, 2927, 2852, 1962, 1450, 1382, 1372, 1347, 1255, 1216, 1166, 1117, 1077, 1022; MS (ESI,  $m/z$ ) 417 ( $\text{M}+\text{Na}^+$ ), 395 ( $\text{M}+\text{H}^+$ ); HRMS calcd. for  $\text{C}_{22}\text{H}_{34}\text{NaO}_6$  ( $\text{M}+\text{Na}^+$ ): 417.2248; Found: 417.2231.

## 21. Preparation of $(R_a)\text{-4kh}$ . hx-12-186

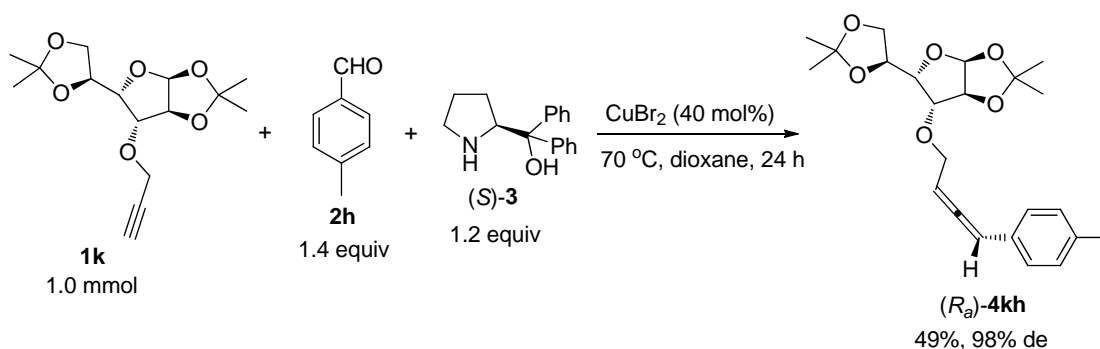

The reaction of  $\text{CuBr}_2$  (89.4 mg, 0.4 mmol), **1k** (299.4 mg, 1.0 mmol), **(*S*)-3** (303.8 mg, 1.2 mmol), and **2h** (168.6 mg, 1.4 mmol) in dioxane (3.0 mL) afforded **(*R<sub>a</sub>*)-4kh** (196.6 mg, 49%) (eluent: petroleum ether/ethyl acetate = 10/1) as a liquid: 98% de (HPLC conditions: Chiralcel IA column, hexane/*i*-PrOH = 100/1, 0.8 mL/min,  $\lambda = 214$  nm,  $t_{\text{R}}(\text{minor}) = 13.8$  min,  $t_{\text{R}}(\text{major}) = 14.8$  min);  $[\alpha]_{\text{D}}^{20} = -150.3$  ( $c = 1.08$ ,  $\text{CHCl}_3$ );  $^1\text{H}$  NMR (300 MHz,  $\text{CDCl}_3$ )  $\delta$  7.19 (d,  $J = 7.8$  Hz, 2 H, ArH), 7.10 (d,  $J = 7.8$  Hz, 2 H, ArH), 6.25 (dt,  $J_1 = 6.0$  Hz,  $J_2 = 2.3$  Hz, 1 H, one proton of  $\text{CH}=\text{C}=\text{CH}$ ), 5.86 (d,  $J = 3.9$  Hz, 1 H), 5.64 (dd,  $J_1 = 13.1$  Hz,  $J_2 = 6.5$  Hz, 1 H, one proton of  $\text{CH}=\text{C}=\text{CH}$ ), 4.54 (d,  $J = 3.6$  Hz, 1 H), 4.39-3.94 (m, 7 H), 2.32 (s, 3 H, Me), 1.48 (s, 3 H, Me), 1.43 (s, 3 H, Me), 1.30 (s, 3 H, Me), 1.26 (s, 3 H, Me);  $^{13}\text{C}$  NMR (75 Hz,  $\text{CDCl}_3$ )  $\delta$  205.7, 136.9, 130.5, 129.3, 126.7, 111.6, 108.8, 105.1, 95.7, 92.2, 82.7, 81.4, 81.0, 72.4, 68.3, 67.1, 26.7, 26.0, 25.2, 21.1; IR (neat)  $\nu$  ( $\text{cm}^{-1}$ ) 2986, 2935, 1950, 1513, 1455, 1382, 1372, 1346, 1255, 1215, 1165, 1117, 1078, 1021; MS (ESI,  $m/z$ ) 425 ( $\text{M}+\text{Na}^+$ ), 403 ( $\text{M}+\text{H}^+$ ); HRMS calcd. for  $\text{C}_{23}\text{H}_{30}\text{NaO}_6$  ( $\text{M}+\text{Na}^+$ ): 425.1935; Found: 425.1934.

## 22. Preparation of (*R<sub>a</sub>*)-4ki. xc-13-50

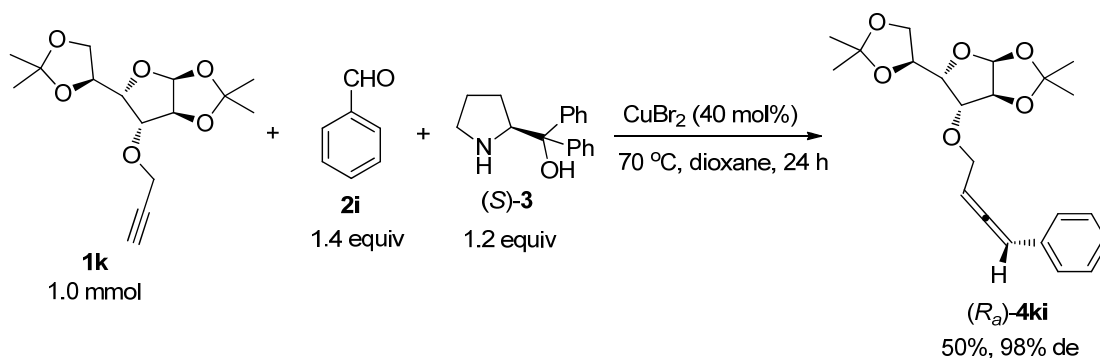

The reaction of  $\text{CuBr}_2$  (90.1 mg, 0.4 mmol),  $\text{1k}$  (298.5 mg, 1.0 mmol),  $(S)\text{-3}$  (304.3 mg, 1.2 mmol), and  $\text{2i}$  (149.0 mg, 1.4 mmol) in dioxane (3.0 mL) afforded  $(R_a)\text{-4ki}$  (193.3 mg, 50%) (eluent: petroleum ether/ethyl acetate = 10/1) as an oil: 98% de (HPLC conditions: Chiralcel IB column, hexane/*i*-PrOH = 100/1, 1.0 mL/min,  $\lambda$  = 214 nm,  $t_{\text{R}}(\text{major})$  = 8.6 min,  $t_{\text{R}}(\text{minor})$  = 11.4 min);  $[\alpha]_{\text{D}}^{20}$  = -154.2 ( $c$  = 1.08,  $\text{CHCl}_3$ );  $^1\text{H}$  NMR (300 MHz,  $\text{CDCl}_3$ )  $\delta$  7.36-7.17 (m, 5 H, ArH), 6.28 (dt,  $J_1$  = 6.3 Hz,  $J_2$  = 2.4 Hz, 1 H, one proton of  $\text{CH}=\text{C}=\text{CH}$ ), 5.86 (d,  $J$  = 3.6 Hz, 1 H), 5.67 (dd,  $J_1$  = 12.9 Hz,  $J_2$  = 6.6 Hz, 1 H, one proton of  $\text{CH}=\text{C}=\text{CH}$ ), 4.55 (d,  $J$  = 3.9 Hz, 1 H), 4.39-4.18 (m, 3 H), 4.16-3.96 (m, 4 H), 1.49 (s, 3 H, Me), 1.43 (s, 3 H, Me), 1.31 (s, 3 H, Me), 1.27 (s, 3 H, Me);  $^{13}\text{C}$  NMR (75 Hz,  $\text{CDCl}_3$ )  $\delta$  205.9, 133.6, 128.6, 127.2, 126.8, 111.7, 108.9, 105.2, 95.9, 92.4, 82.8, 81.5, 81.1, 72.4, 68.3, 67.2, 26.8, 26.1, 25.3; IR (neat)  $\nu$  ( $\text{cm}^{-1}$ ) 2986, 2935, 2890, 1951, 1496, 1459, 1382, 1372, 1255, 1216, 1165, 1117, 1077, 1021; MS (ESI,  $m/z$ ) 411 ( $\text{M}+\text{Na}^+$ ); HRMS calcd. for  $\text{C}_{22}\text{H}_{28}\text{NaO}_6$  ( $\text{M}+\text{Na}^+$ ): 411.1778; Found: 411.1798.

### 23. Preparation of $(R_a)\text{-4kj}$ . hx-12-179

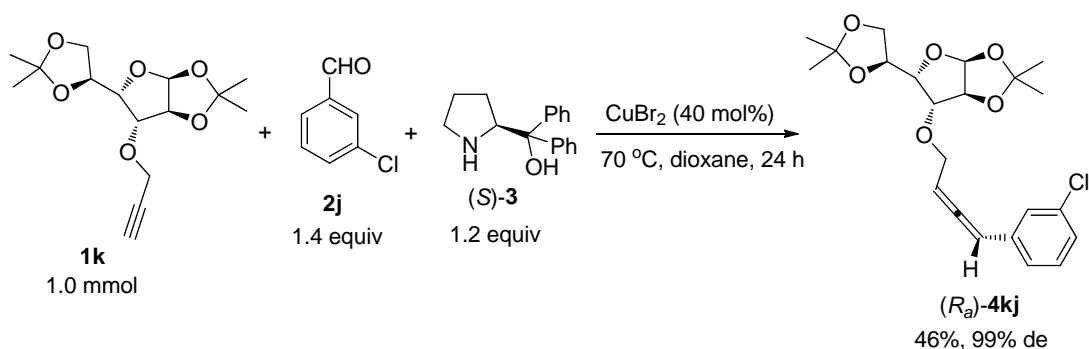

The reaction of **CuBr<sub>2</sub>** (89.5 mg, 0.4 mmol), **1k** (297.7 mg, 1.0 mmol), **(S)-3** (303.8 mg, 1.2 mmol), and **2j** (197.2 mg, 1.4 mmol) in dioxane (3.0 mL) afforded **(R<sub>a</sub>)-4kj** (195.5 mg, 46%) (eluent: petroleum ether/ethyl acetate = 10/1) as a liquid: 99% de (HPLC conditions: Chiralcel IA column, hexane/*i*-PrOH = 200/1, 0.8 mL/min,  $\lambda = 214$  nm,  $t_R(\text{minor}) = 27.4$  min,  $t_R(\text{major}) = 29.6$  min);  $[\alpha]_D^{20} = -151.6$  ( $c = 1.23$ ,  $\text{CHCl}_3$ );  $^1\text{H NMR}$  (300 MHz,  $\text{CDCl}_3$ )  $\delta$  7.32-7.13 (m, 4 H, ArH), 6.22 (dt,  $J_1 = 6.3$  Hz,  $J_2 = 2.4$  Hz, 1 H, one proton of  $\text{CH}=\text{C}=\text{CH}$ ), 5.87 (d,  $J = 3.6$  Hz, 1 H), 5.64 (dd,  $J_1 = 12.9$  Hz,  $J_2 = 6.6$  Hz, 1 H, one proton of  $\text{CH}=\text{C}=\text{CH}$ ), 4.55 (d,  $J = 3.6$  Hz, 1 H), 4.37-4.20 (m, 3 H), 4.17-4.05 (m, 2 H), 4.04-3.96 (m, 2 H), 1.49 (s, 3 H, Me), 1.43 (s, 3 H, Me), 1.31 (s, 3 H, Me), 1.27 (s, 3 H, Me);  $^{13}\text{C NMR}$  (75 Hz,  $\text{CDCl}_3$ )  $\delta$  206.0, 135.6, 134.5, 129.7, 127.1, 126.6, 124.9, 111.6, 108.8, 105.1, 95.0, 92.8, 82.7, 81.5, 81.0, 72.3, 67.9, 67.1, 26.69, 26.66, 26.0, 25.1; IR (neat)  $\nu$  ( $\text{cm}^{-1}$ ) 2987, 2935, 2890, 1953, 1594, 1571, 1478, 1454, 1382, 1372, 1347, 1254, 1216, 1165, 1078, 1021; MS (ESI,  $m/z$ ) 447 ( $\text{M}(^{37}\text{Cl})+\text{Na}^+$ ), 445 ( $\text{M}(^{35}\text{Cl})+\text{Na}^+$ ); HRMS calcd. for  $\text{C}_{22}\text{H}_{27}\text{O}_6^{35}\text{ClNa}$  ( $\text{M}(^{35}\text{Cl})+\text{Na}^+$ ): 445.1388; Found: 445.1386.



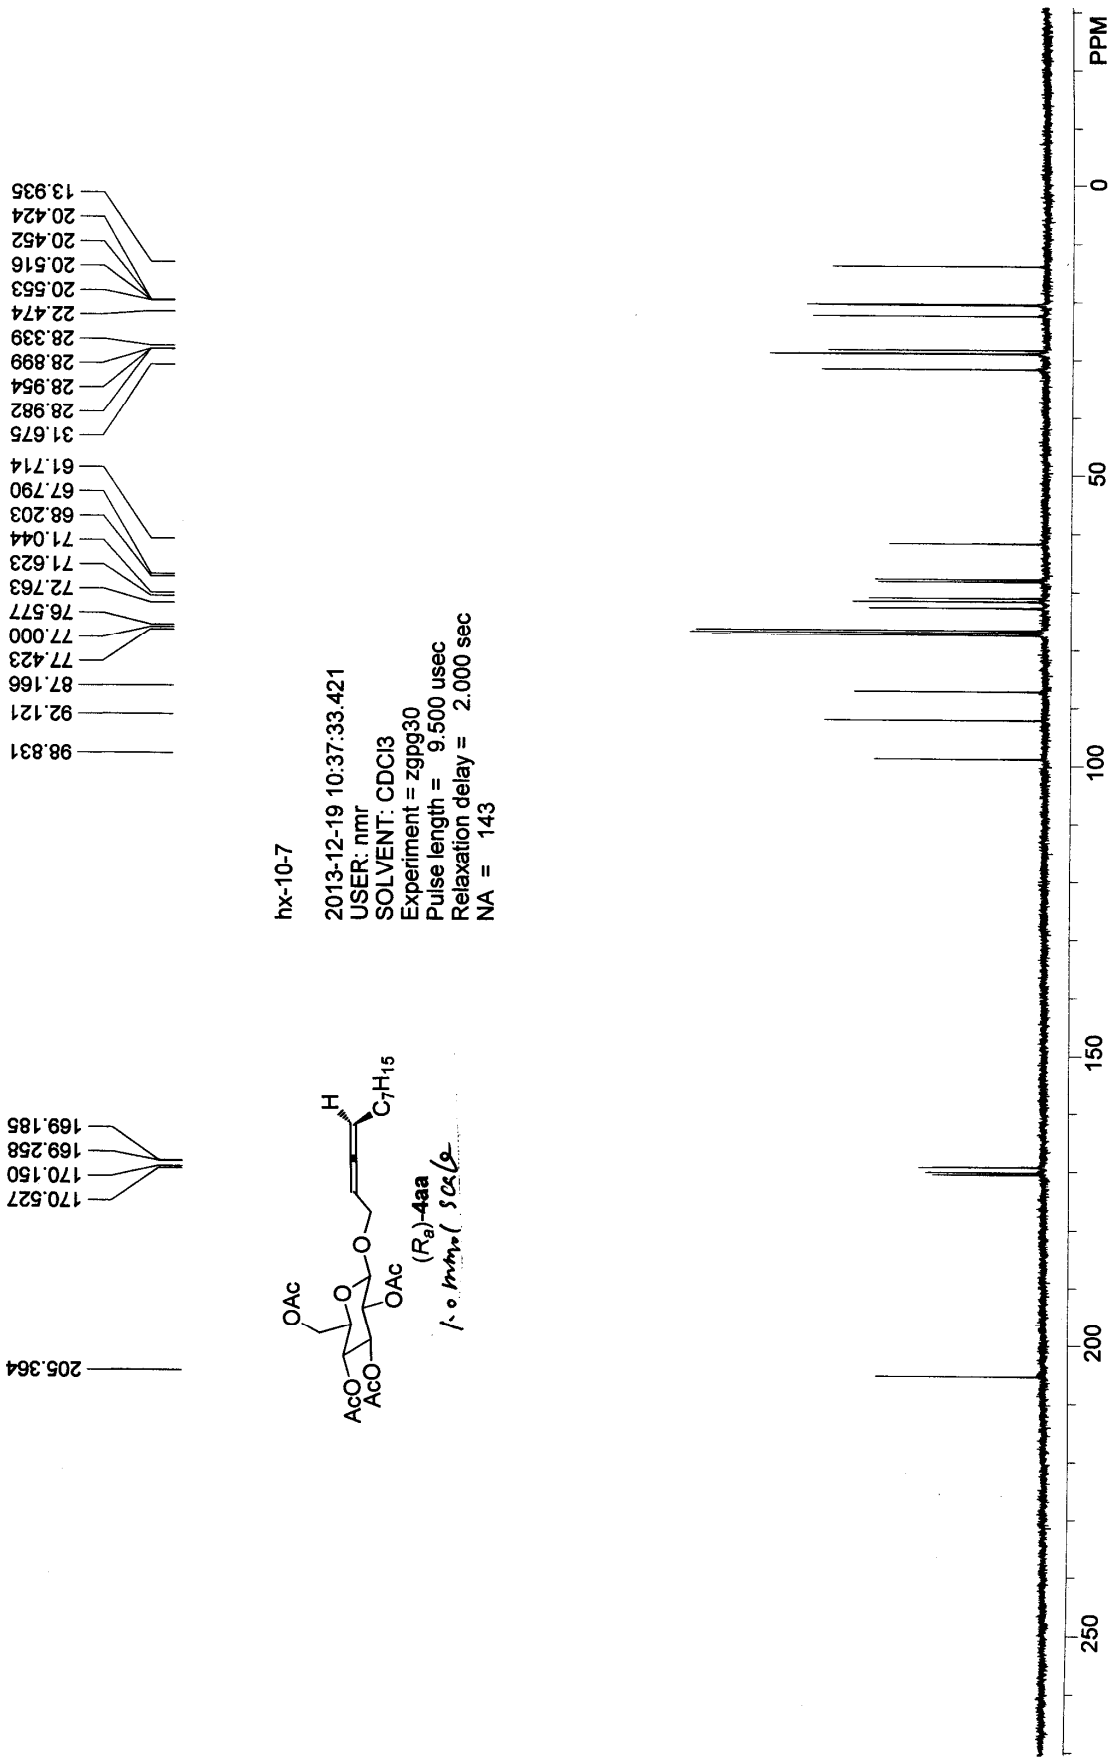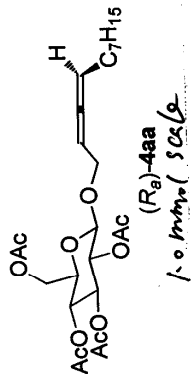

# hx-10-7-as-h-95-5-0.3-214

实验时间: 2013-12-24, 9:43:57

报告时间: 2013-12-25, 17:11:40

谱图文件: D:\zhuguangjiong\hx\20131224\hx-10-7-as-h-95-5-0.3-214.org

实验内容简介:

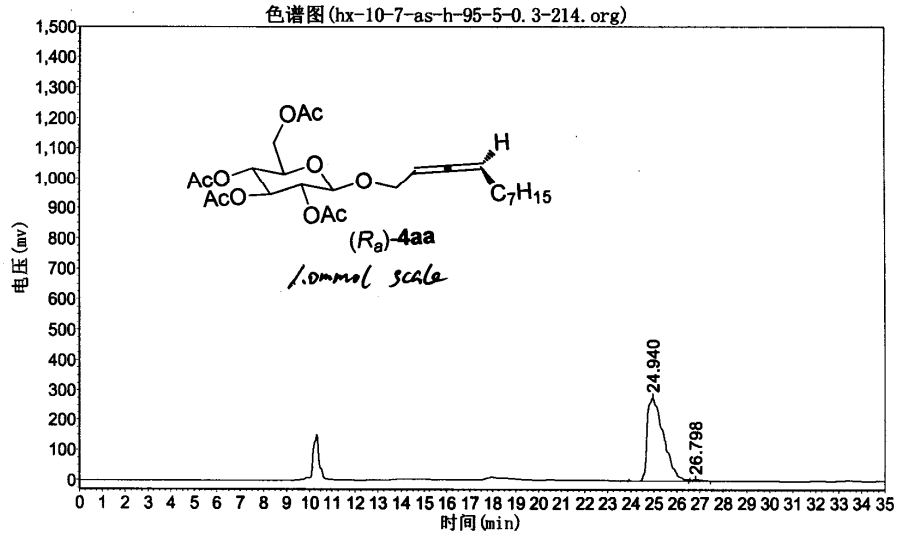

分析结果表

| 峰号 | 峰名 | 保留时间   | 峰高         | 峰面积          | 含量       |
|----|----|--------|------------|--------------|----------|
| 1  |    | 24.940 | 278361.063 | 13509224.000 | 98.9368  |
| 2  |    | 26.798 | 4297.991   | 145171.766   | 1.0632   |
| 总计 |    |        | 282659.053 | 13654395.766 | 100.0000 |

# hx-9-140-as-h-95-5-0.3-214

实验时间: 2013-12-24, 8:49:22

报告时间: 2013-12-25, 17:09:36

谱图文件: D:\zhuguangjiong\hx\20131224\hx-9-140-as-h-95-5-0.3-214.org

实验内容简介:

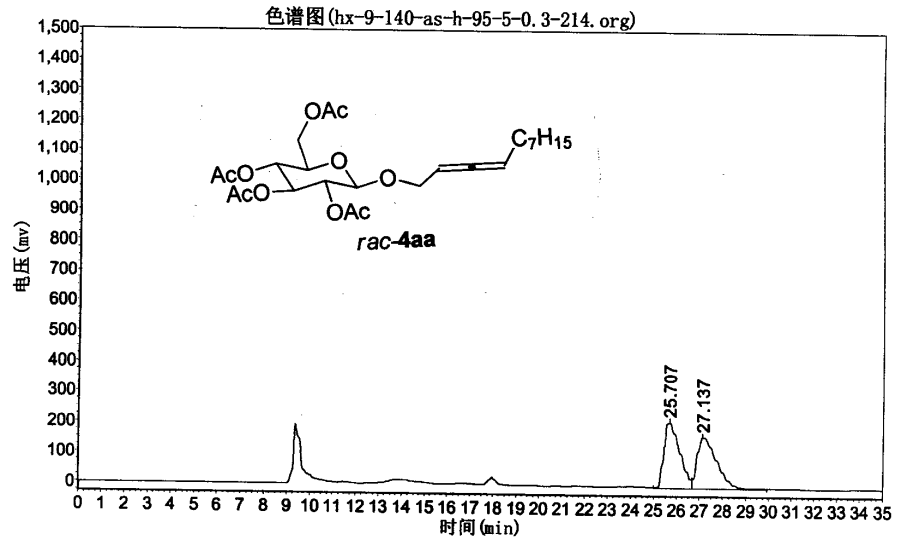

分析结果表

| 峰号 | 峰名 | 保留时间   | 峰高         | 峰面积          | 含量       |
|----|----|--------|------------|--------------|----------|
| 1  |    | 25.707 | 215984.016 | 10384250.000 | 50.5456  |
| 2  |    | 27.137 | 167907.828 | 10160053.000 | 49.4544  |
| 总计 |    |        | 383891.844 | 20544303.000 | 100.0000 |



7.317  
5.248  
5.217  
5.200  
5.186  
5.160  
5.134  
5.123  
5.102  
5.070  
5.040  
5.013  
5.008  
4.982  
4.649  
4.623  
4.332  
4.323  
4.315  
4.312  
4.300  
4.293  
4.284  
4.274  
4.263  
4.259  
4.162  
4.155  
4.150  
4.142  
4.136  
4.130  
4.123  
4.116  
4.110  
4.101  
4.097  
4.090  
3.711  
3.704  
3.696  
3.688  
3.679  
3.671  
3.663  
3.655  
2.088  
2.051  
2.051  
2.029  
2.011  
1.990  
1.980  
1.432  
1.416  
1.393  
1.292  
0.911  
0.890  
0.866  
0.000

hx-10-97

2014-03-06 20:50:36.187  
 USER: nmr  
 SOLVENT: CDCl3  
 Experiment = zg30  
 Pulse length = 14.000 usec  
 Relaxation delay = 1.000 sec  
 NA = 8

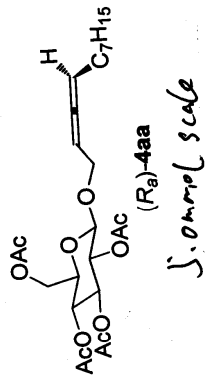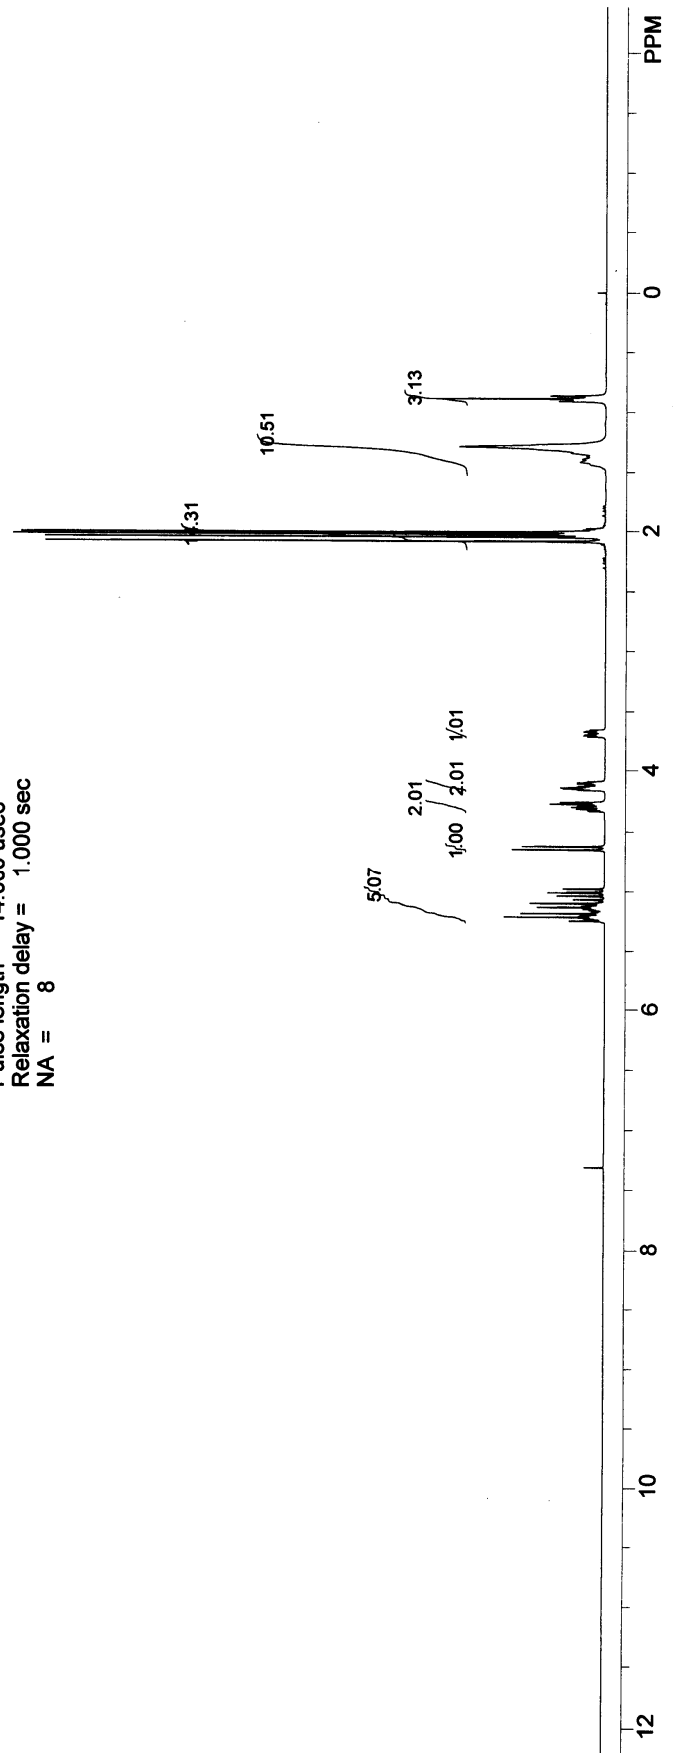

# hx-10-97-as-h-95-5-0.4-214

实验时间: 2014-03-11, 15:53:03

报告时间: 2014-03-12, 15:37:31

谱图文件: D:\zhuguangjiong\hx\20140311\hx-10-97-as-h-95-5-0.4-214..org

实验内容简介:

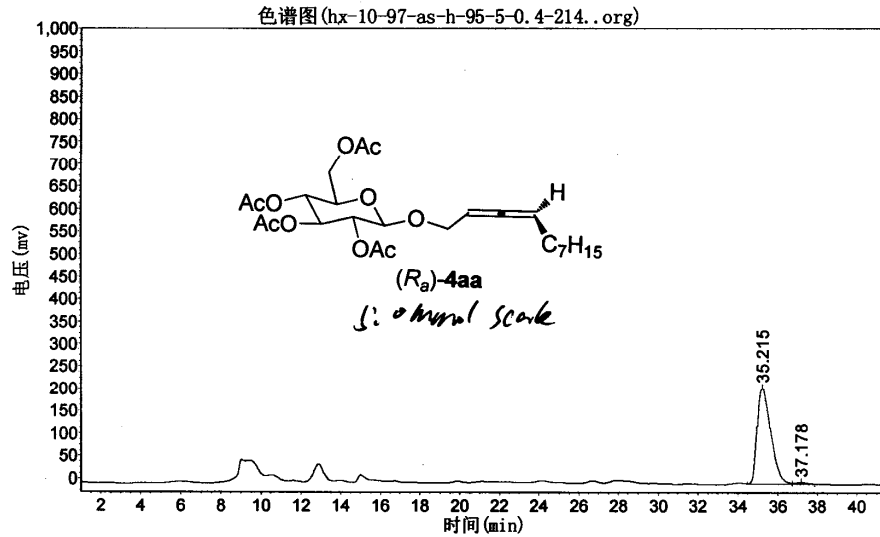

分析结果表

| 峰号 | 峰名 | 保留时间   | 峰高         | 峰面积          | 含量       |
|----|----|--------|------------|--------------|----------|
| 1  |    | 35.215 | 212151.531 | 10118550.000 | 98.7541  |
| 2  |    | 37.178 | 3154.016   | 127653.867   | 1.2459   |
| 总计 |    |        | 215305.548 | 10246203.867 | 100.0000 |

# hx-8-86-as-h-95-5-0.4-214

实验时间: 2014-03-11, 14:12:21

报告时间: 2014-03-11, 14:59:09

谱图文件: D:\zhuguangji\hx\20140311\hx-8-86-as-h-95-5-0.4-214.org

实验内容简介:

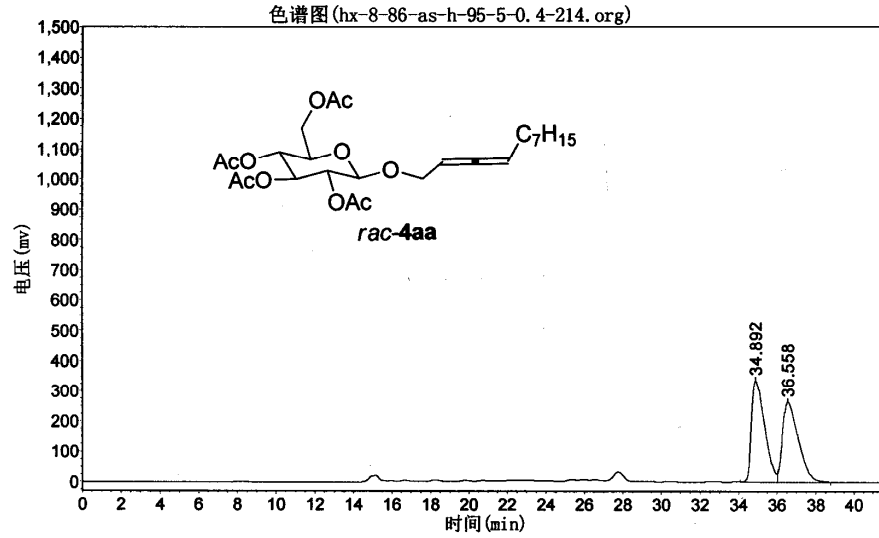

分析结果表

| 峰号 | 峰名 | 保留时间   | 峰高         | 峰面积          | 含量       |
|----|----|--------|------------|--------------|----------|
| 1  |    | 34.892 | 334952.438 | 16051996.000 | 51.4118  |
| 2  |    | 36.558 | 264060.406 | 15170393.000 | 48.5882  |
| 总计 |    |        | 599012.844 | 31222389.000 | 100.0000 |

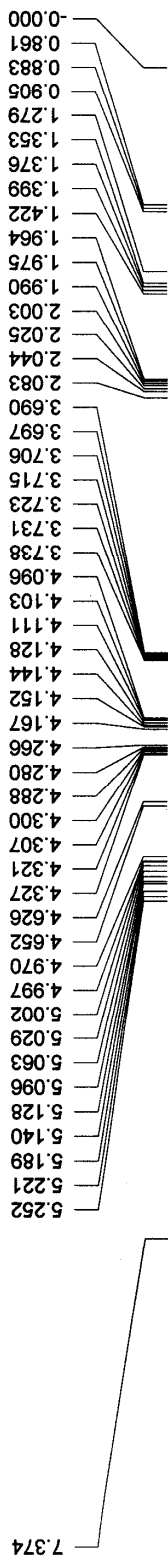

hx-10-98

2014-03-06 21:16:18.687

USER: nmr

SOLVENT: CDCl3

Experiment = zg30

Pulse length = 14.000 usec

Relaxation delay = 1.000 sec

NA = 8

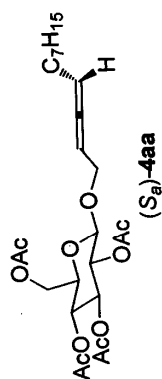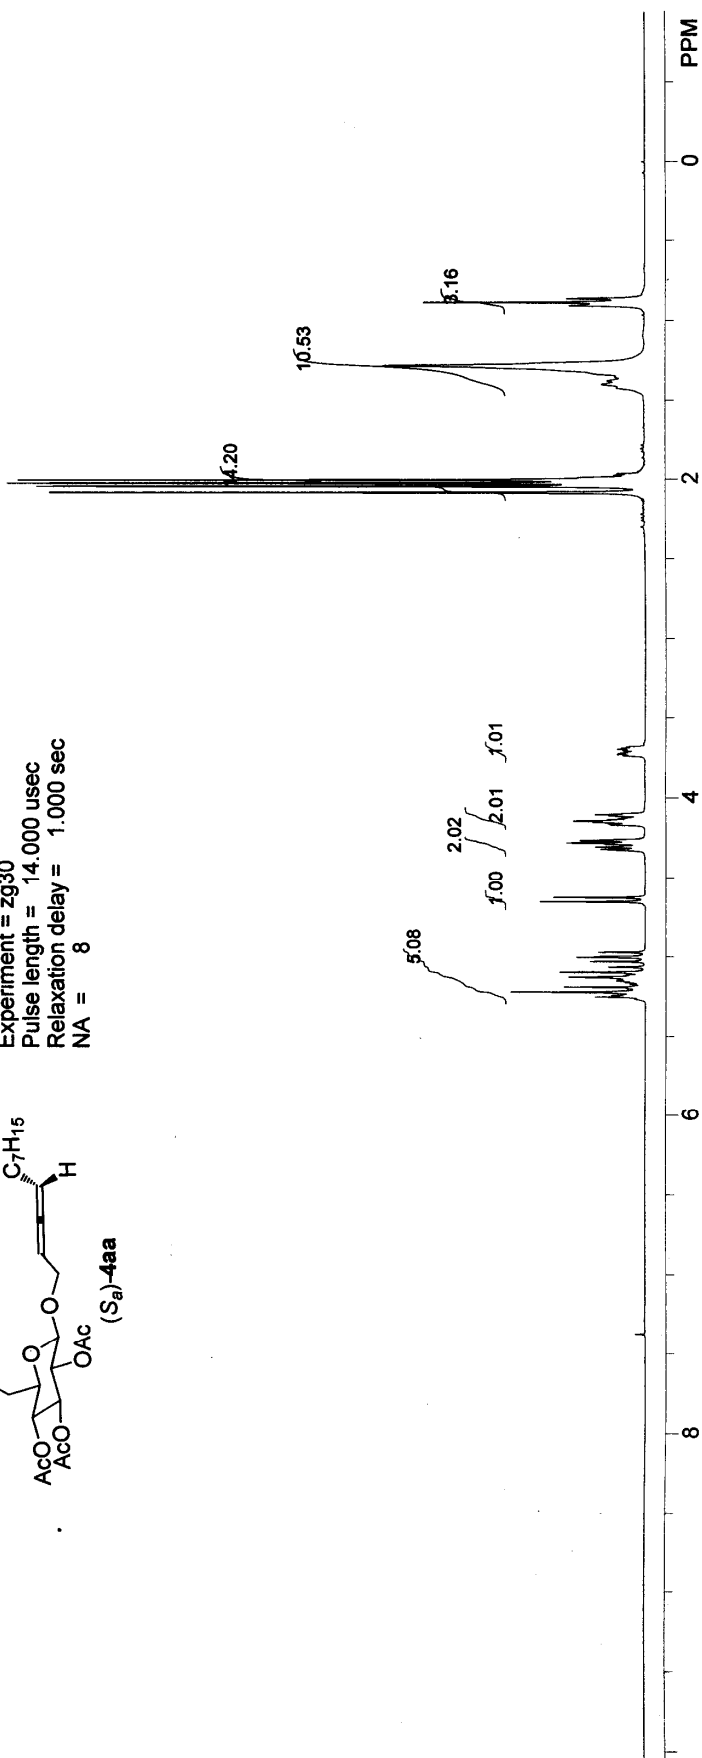

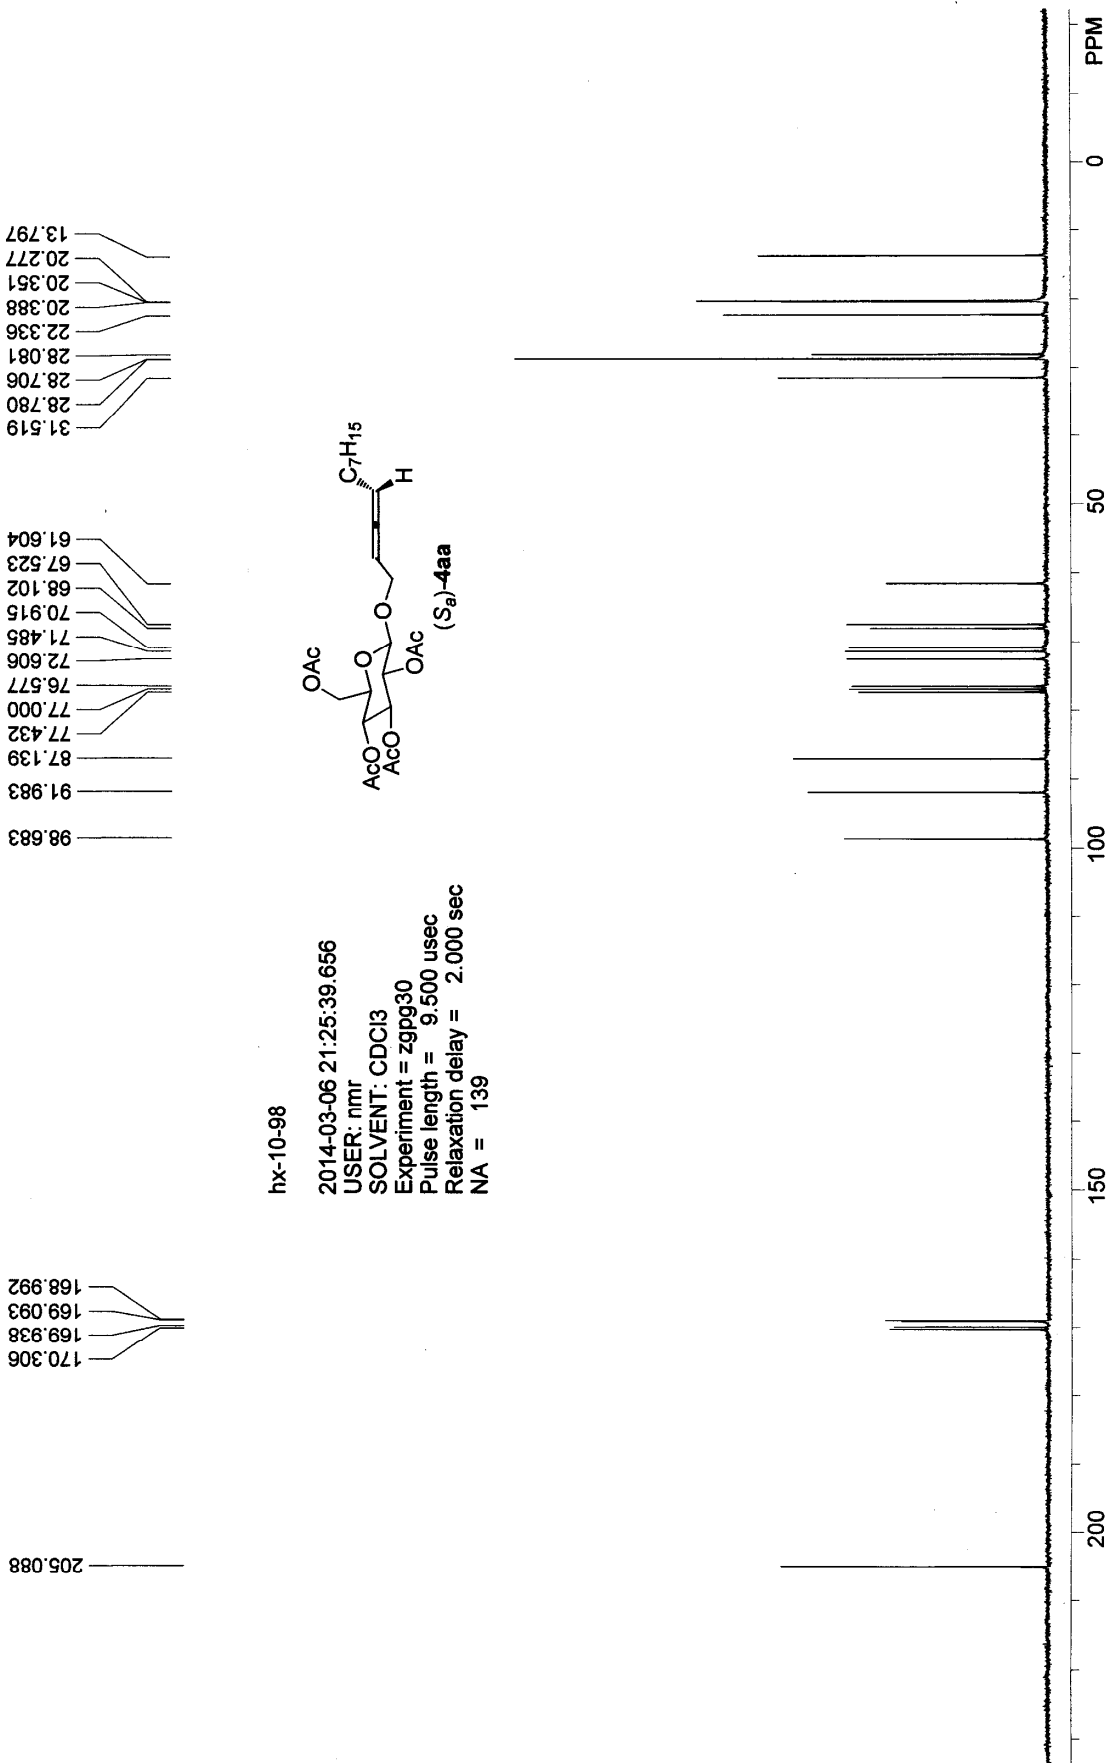

hx-10-98

2014-03-06 21:25:39.656  
 USER: nmr  
 SOLVENT: CDCl3  
 Experiment = zgpg30  
 Pulse length = 9.500 usec  
 Relaxation delay = 2.000 sec  
 NA = 139

# hx-10-98-as-h-95-5-0.4-214

实验时间: 2014-03-11, 17:29:11

报告时间: 2014-03-12, 15:39:19

谱图文件: D:\zhuguangji\hx\20140311\hx-10-98-as-h-95-5-0.4-214.org

实验内容简介:

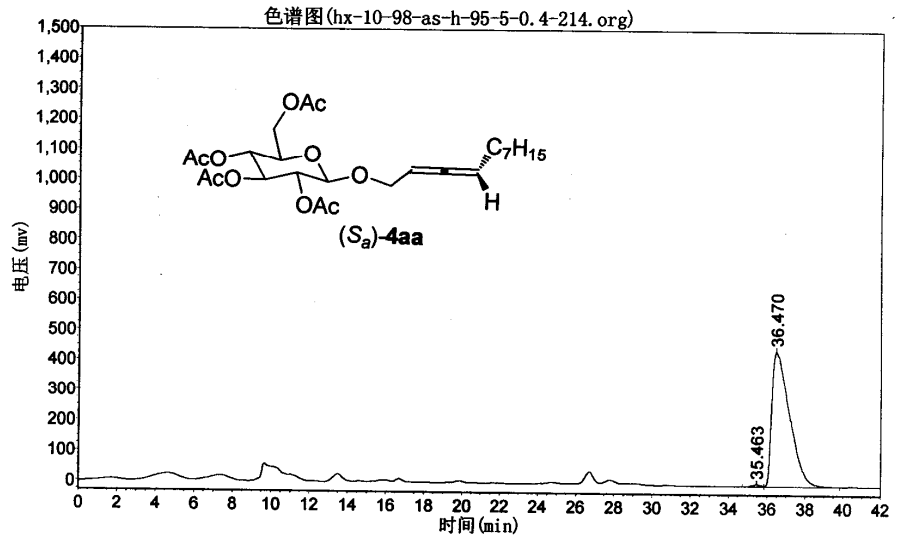

分析结果表

| 峰号 | 峰名 | 保留时间   | 峰高         | 峰面积          | 含量       |
|----|----|--------|------------|--------------|----------|
| 1  |    | 35.463 | 7538.812   | 254559.391   | 0.8754   |
| 2  |    | 36.470 | 445148.000 | 28826192.000 | 99.1246  |
| 总计 |    |        | 452686.812 | 29080751.391 | 100.0000 |

# hx-8-86-as-h-95-5-0.4-214

实验时间: 2014-03-11, 14:12:21

报告时间: 2014-03-11, 14:59:09

谱图文件: D:\zhuguangjiong\hx\20140311\hx-8-86-as-h-95-5-0.4-214.org

实验内容简介:

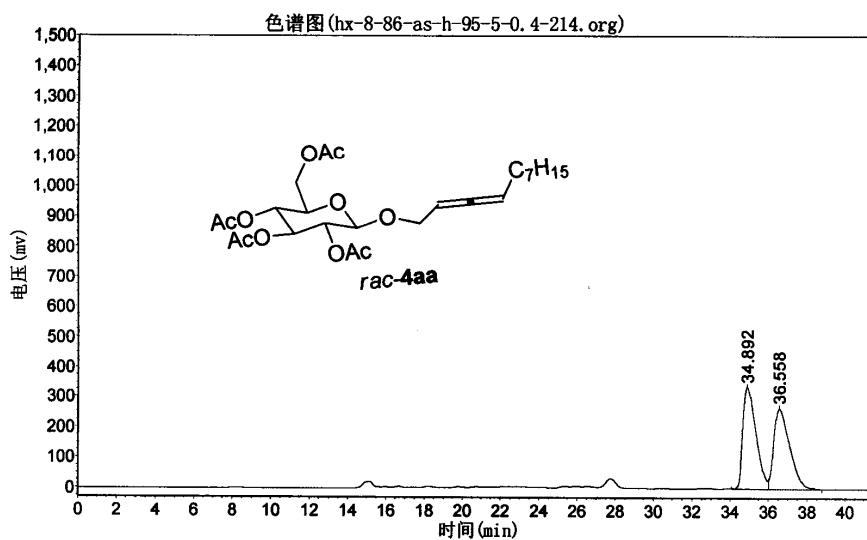

分析结果表

| 峰号 | 峰名 | 保留时间   | 峰高         | 峰面积          | 含量       |
|----|----|--------|------------|--------------|----------|
| 1  |    | 34.892 | 334952.438 | 16051996.000 | 51.4118  |
| 2  |    | 36.558 | 264060.406 | 15170393.000 | 48.5882  |
| 总计 |    |        | 599012.844 | 31222389.000 | 100.0000 |

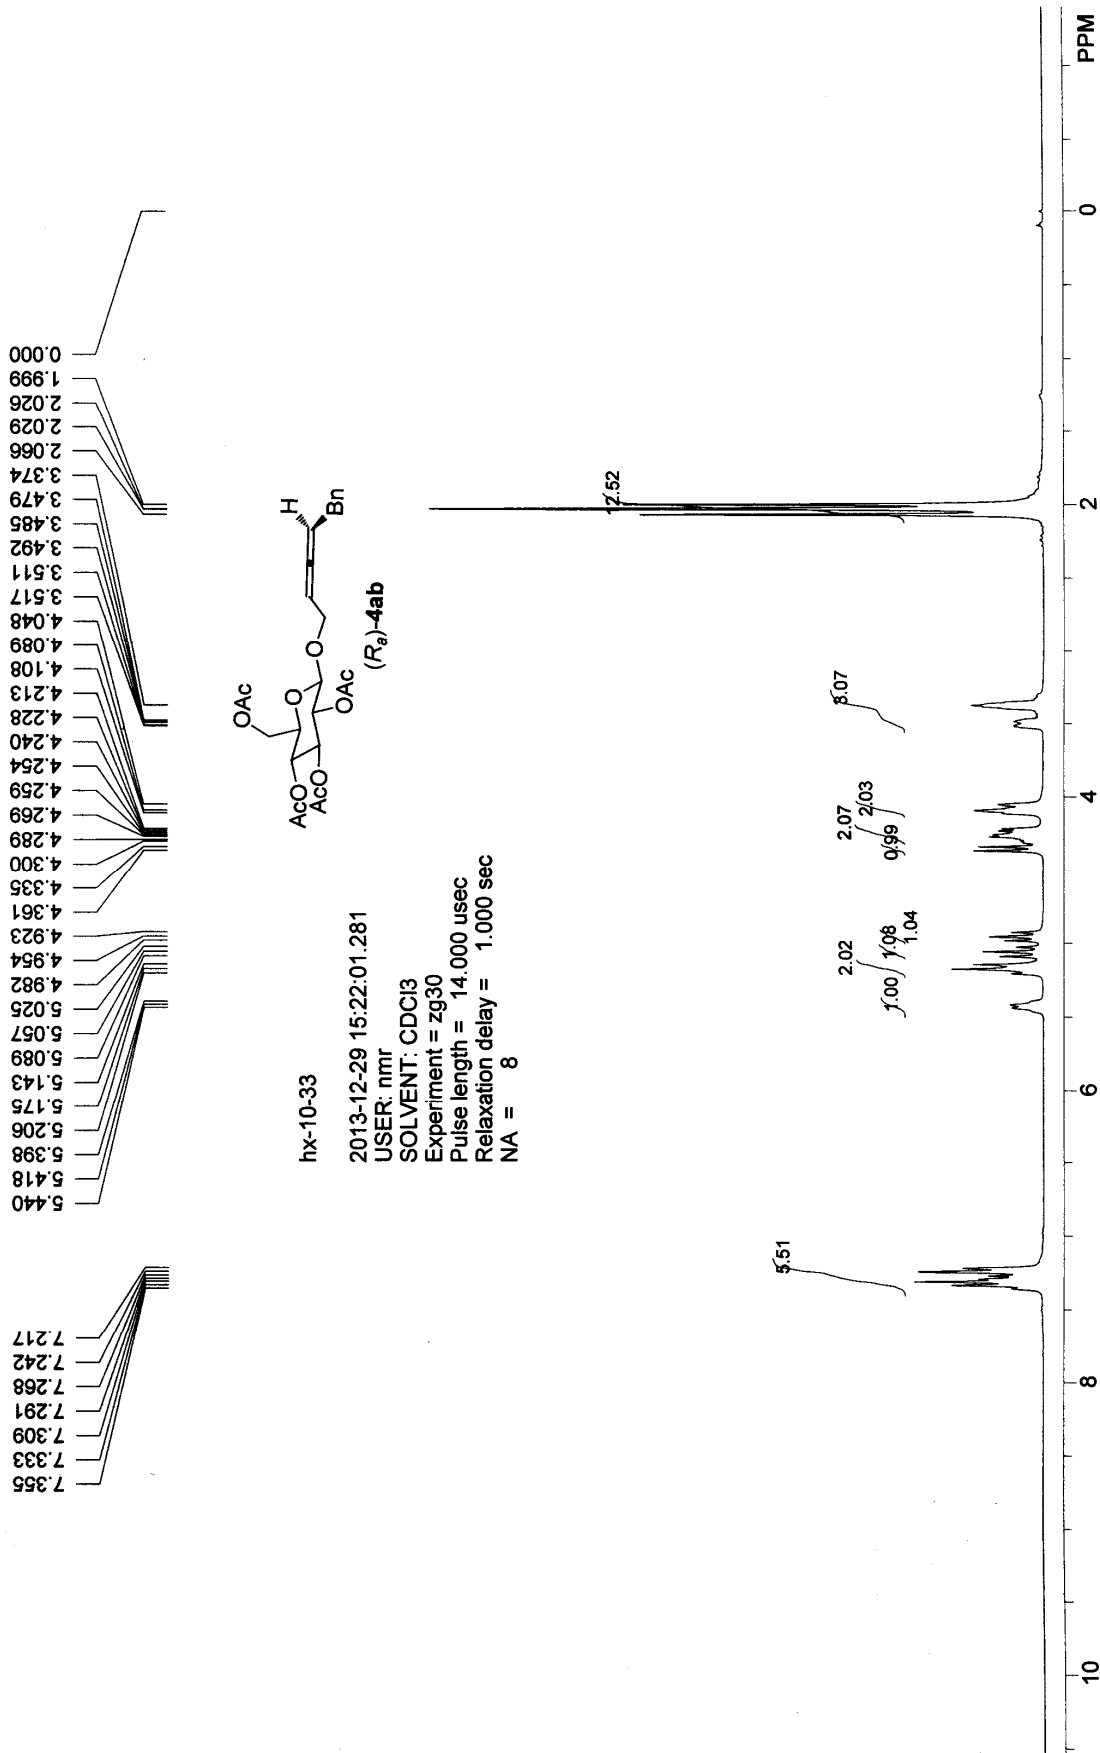



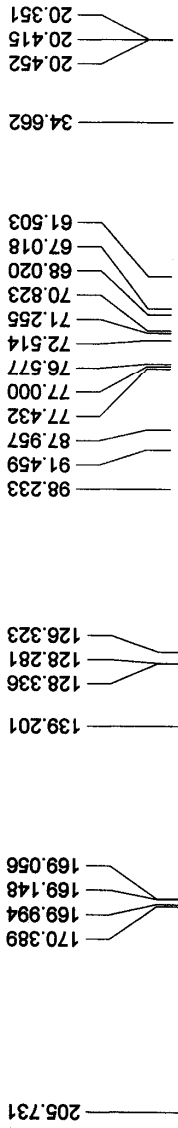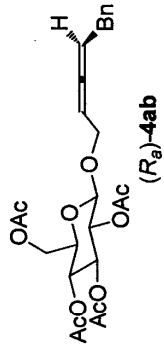

hx-10-33

2013-12-29 15:34:13.468

USER: nmr

SOLVENT: CDCl<sub>3</sub>

Experiment = zgpg30

Pulse length = 9.500 usec

Relaxation delay = 2.000 sec

NA = 111

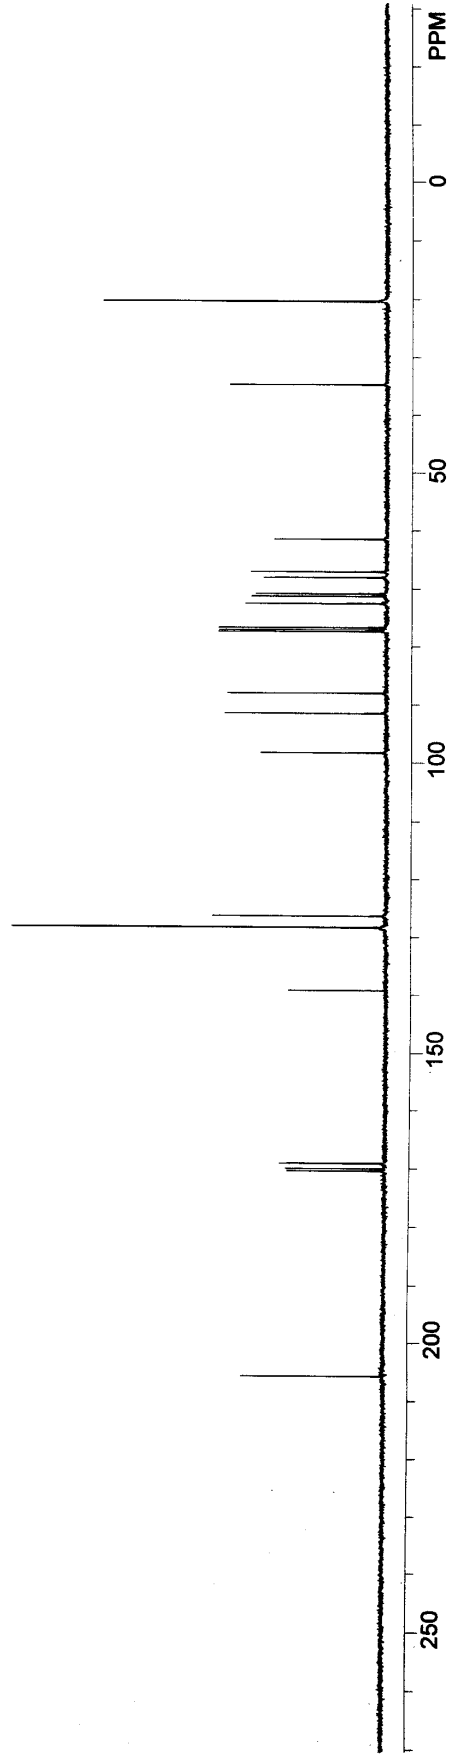

# hx-10-33-ia-h-95-5-1-214

实验时间: 2014-01-10, 10:45:54

报告时间: 2014-01-10, 11:59:29

谱图文件: D:\zhuguangjiong\hx\20140107\hx-10-33-ia-h-95-5-1-214...org

实验内容简介:

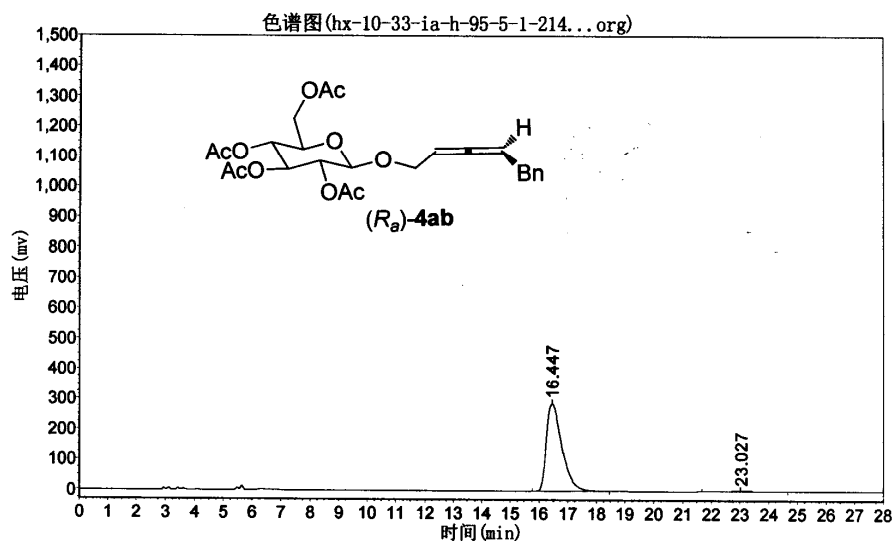

分析结果表

| 峰号 | 峰名 | 保留时间   | 峰高         | 峰面积          | 含量       |
|----|----|--------|------------|--------------|----------|
| 1  |    | 16.447 | 289720.625 | 10930804.000 | 98.6397  |
| 2  |    | 23.027 | 2218.483   | 150741.797   | 1.3603   |
| 总计 |    |        | 291939.108 | 11081545.797 | 100.0000 |

# hx-10-46-ia-h-95-5-1-214

实验时间: 2014-01-10, 9:48:51

报告时间: 2014-01-10, 11:57:13

谱图文件: D:\zhuguangji\hx\20140107\hx-10-46-ia-h-95-5-1-214.org

实验内容简介:

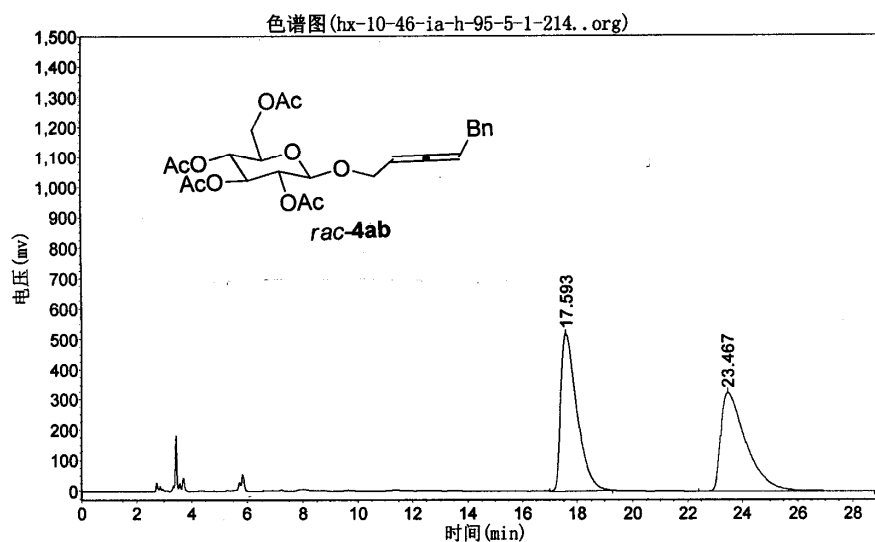

分析结果表

| 峰号 | 峰名 | 保留时间   | 峰高         | 峰面积          | 含量       |
|----|----|--------|------------|--------------|----------|
| 1  |    | 17.593 | 518016.875 | 21159832.000 | 50.7949  |
| 2  |    | 23.467 | 323006.969 | 20497596.000 | 49.2051  |
| 总计 |    |        | 841023.844 | 41657428.000 | 100.0000 |

7.300  
7.290  
7.276  
7.267  
7.212  
7.207  
7.196  
7.189  
7.171

5.275  
5.267  
5.238  
5.223  
5.206  
5.175  
5.138  
5.127  
5.118  
5.086  
5.055  
5.024  
4.997  
4.966  
4.933  
4.881  
4.854  
4.276  
4.267  
4.252  
4.246  
4.228  
4.215  
4.206  
4.135  
4.102  
4.094  
4.065  
4.058  
4.051  
4.026  
3.679  
3.656  
3.638  
3.631  
2.759  
2.735  
2.708  
2.386  
2.376  
2.364  
2.359  
2.342  
2.337  
2.327  
2.313  
2.072  
2.027  
2.019  
2.001  
-0.000

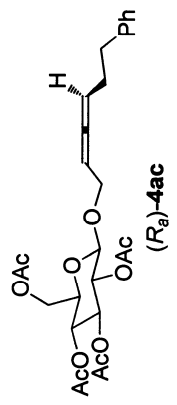

D:\new nuts\DATA\spdata  
spect, CDCl3,  
Fri Jul 25 06:53:27 2014  
USER: nmr  
SOLVENT:  
Experiment = zg30  
Pulse length = 14.000 usec  
Recycle delay = 1.000 sec  
NA = 8  
PTSD = 32768  
F1 = 300.131866 MHz  
F2 = 1.000000 MHz  
SW1 = 6188.12 Hz

xc-12-018

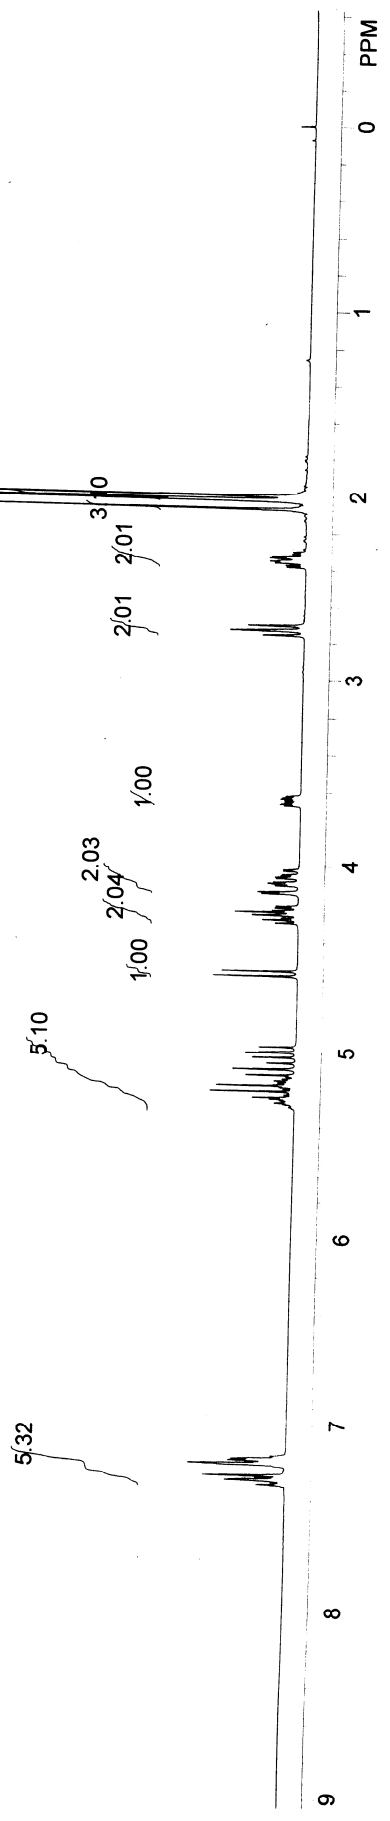

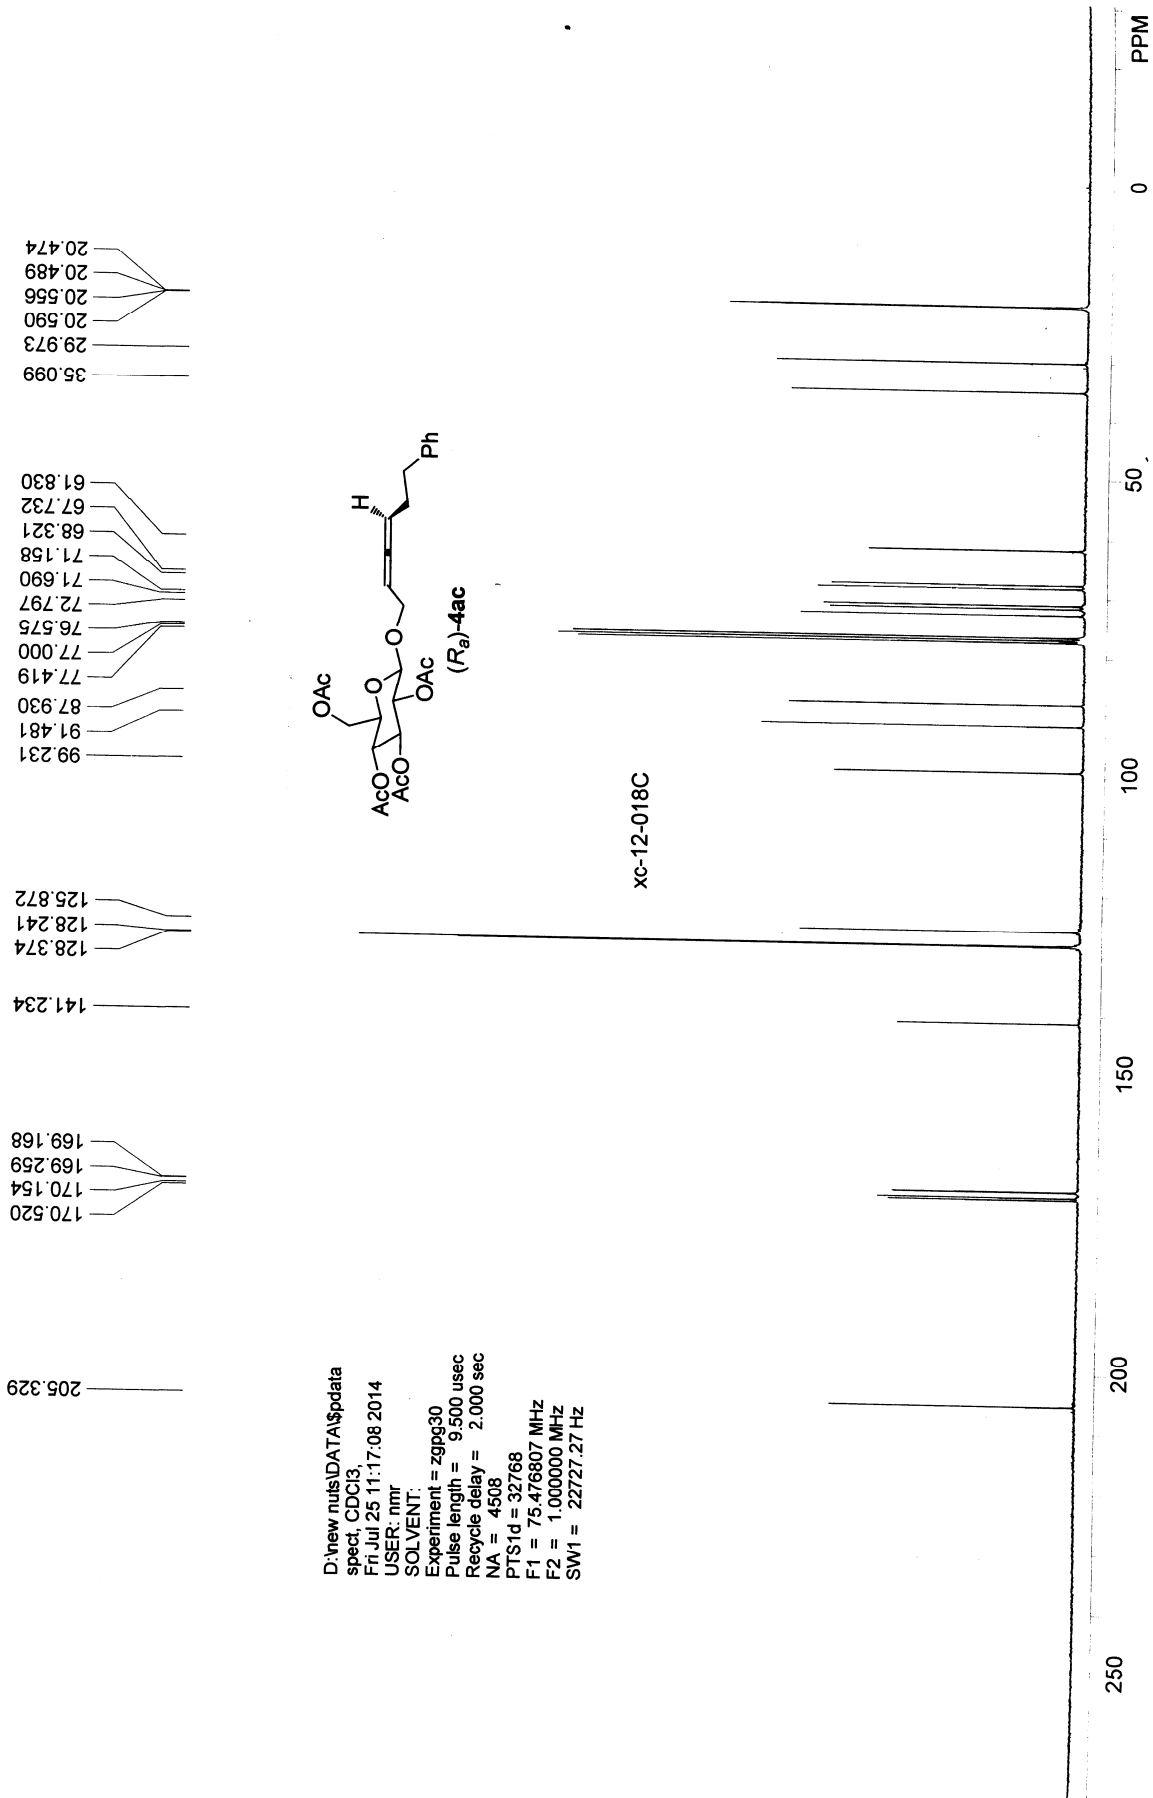

D:\new nuts\DATA\pdata  
 spect, CDCI3,  
 Fri Jul 25 11:17:08 2014  
 USER: nmr  
 SOLVENT:  
 Experiment = zgpg30  
 Pulse length = 9.500 usec  
 Recycle delay = 2.000 sec  
 NA = 4508  
 PTS1d = 32768  
 F1 = 75.476807 MHz  
 F2 = 1.000000 MHz  
 SW1 = 22727.27 Hz

xc-12-18

实验单位: zju  
 实验时间: 2014-07-23, 19:30:25  
 谱图文件: D:\浙大智达\N2000\样品\B0348.org

报告时间: 2014-07-23, 20:05:15  
 积分方法: 面积归一法

实验内容简介:  
 OD-H column, n-hexane/iPrOH = 90/10, 214 nm, 1.0 ml/min

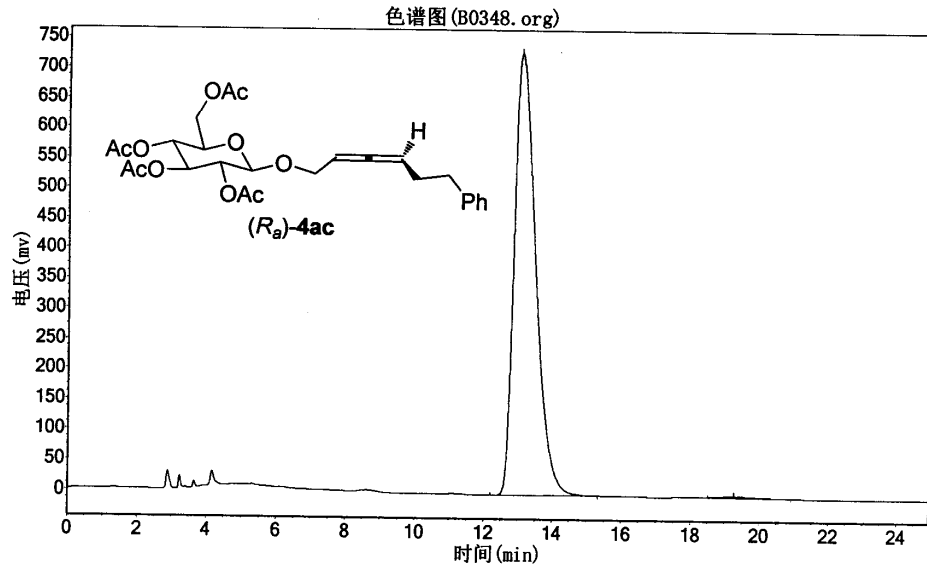

分析结果表

| 峰号 | 峰名 | 保留时间   | 峰高         | 峰面积          | 含量       |
|----|----|--------|------------|--------------|----------|
| 1  |    | 13.078 | 730860.813 | 31448738.000 | 99.5941  |
| 2  |    | 19.270 | 1979.851   | 128167.211   | 0.4059   |
| 总计 |    |        | 732840.663 | 31576905.211 | 100.0000 |

2014-07-23

浙江大学智能信息研究所

## hx-8-108

实验单位: zju  
 实验时间: 2014-07-23, 19:58:04  
 谱图文件: D:\浙大智达\N2000\样品\B0349.org

实验者: hx  
 报告时间: 2014-07-23, 20:39:07  
 积分方法: 面积归一法

实验内容简介:  
 OD-H column, n-hexane/iPrOH = 90/10, 214 nm, 1.0 ml/min

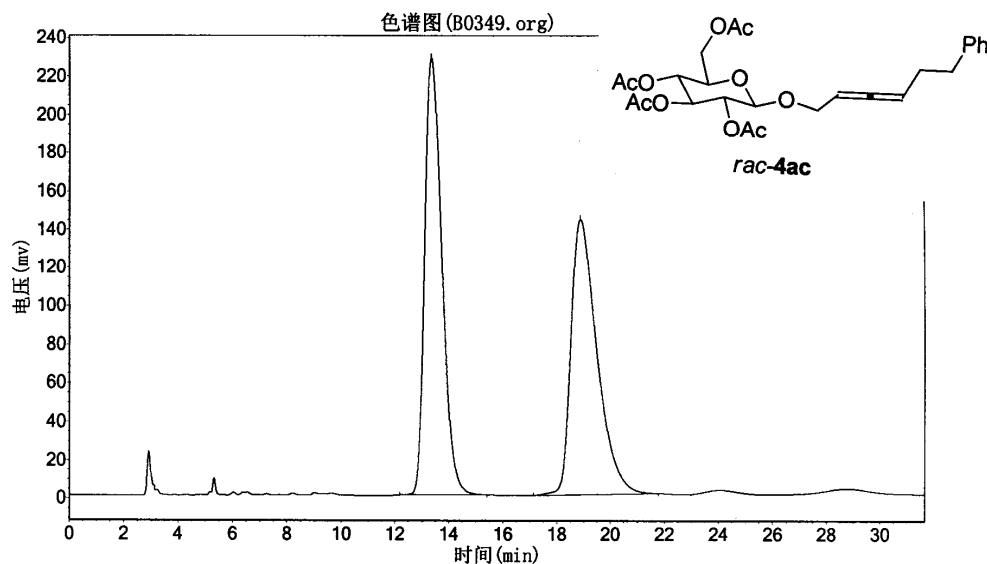

分析结果表

| 峰号 | 峰名 | 保留时间   | 峰高         | 峰面积          | 含量       |
|----|----|--------|------------|--------------|----------|
| 1  |    | 13.357 | 227702.375 | 10106964.000 | 51.2781  |
| 2  |    | 18.887 | 143049.047 | 9603139.000  | 48.7219  |
| 总计 |    |        | 370751.422 | 19710103.000 | 100.0000 |

2014-07-23

浙江大学智能信息研究所

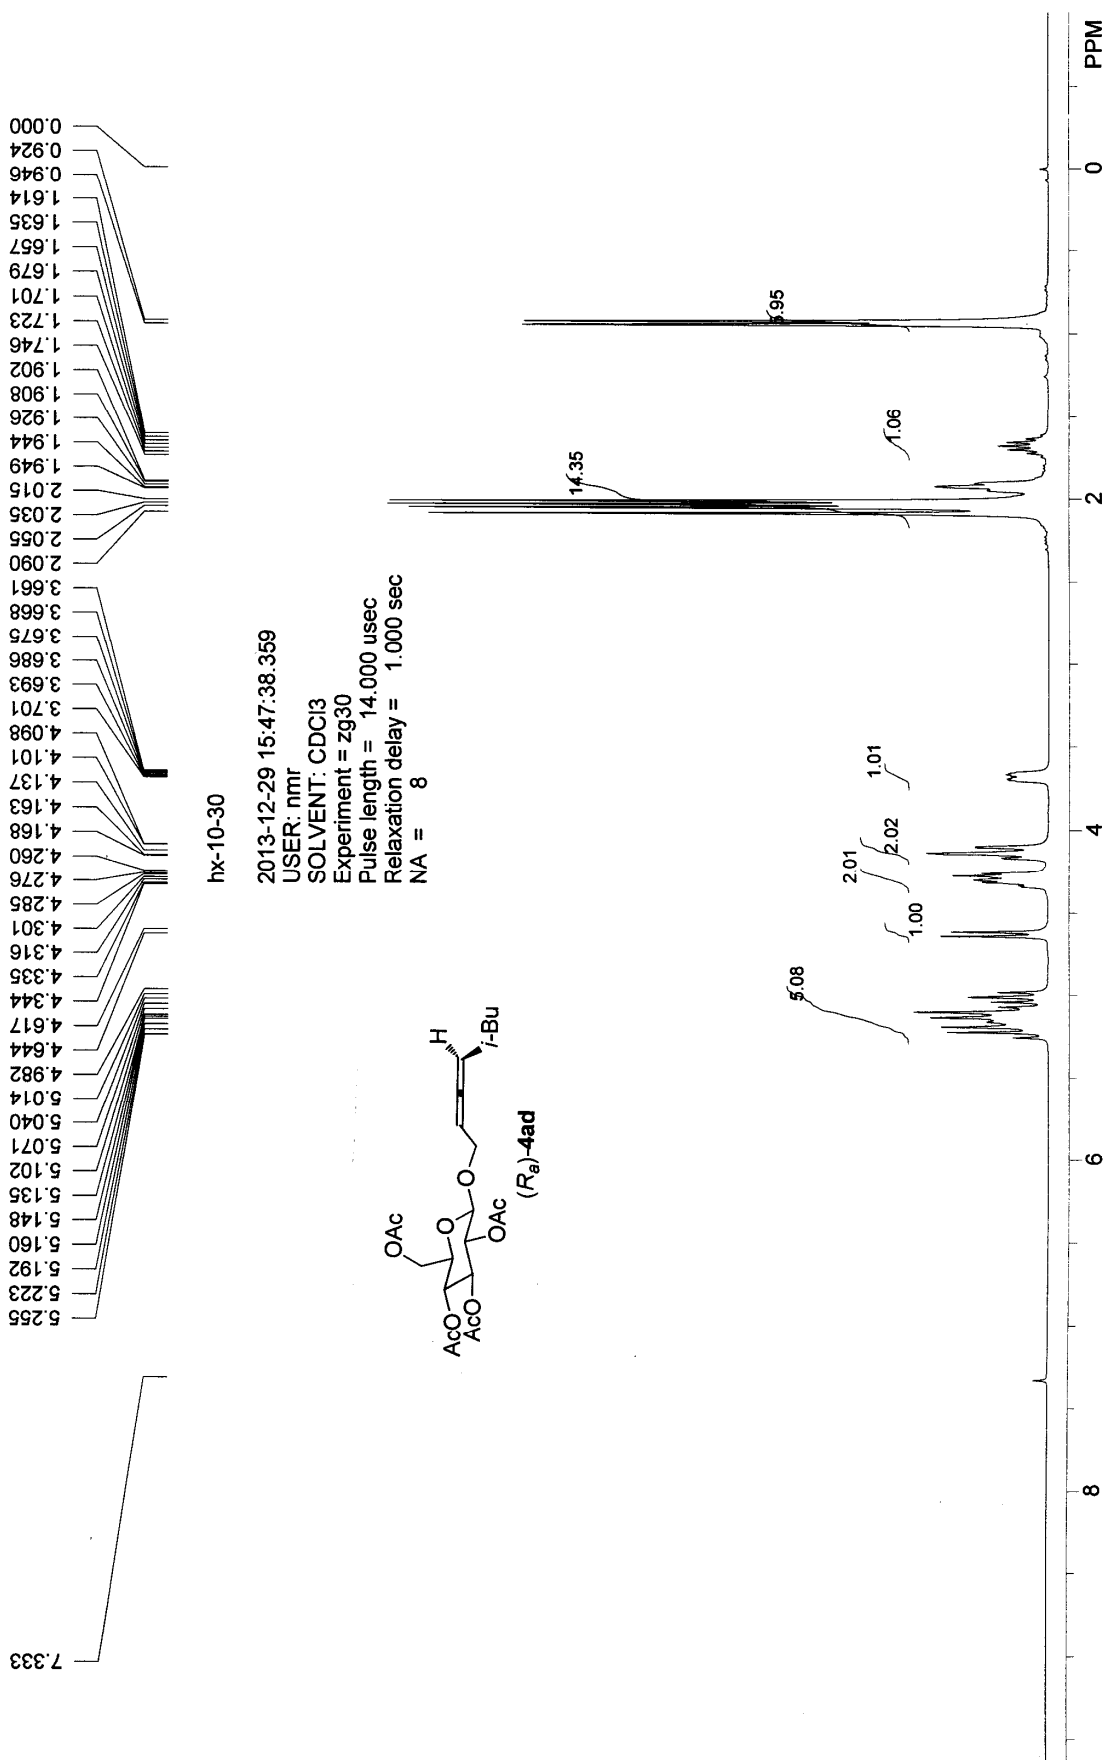



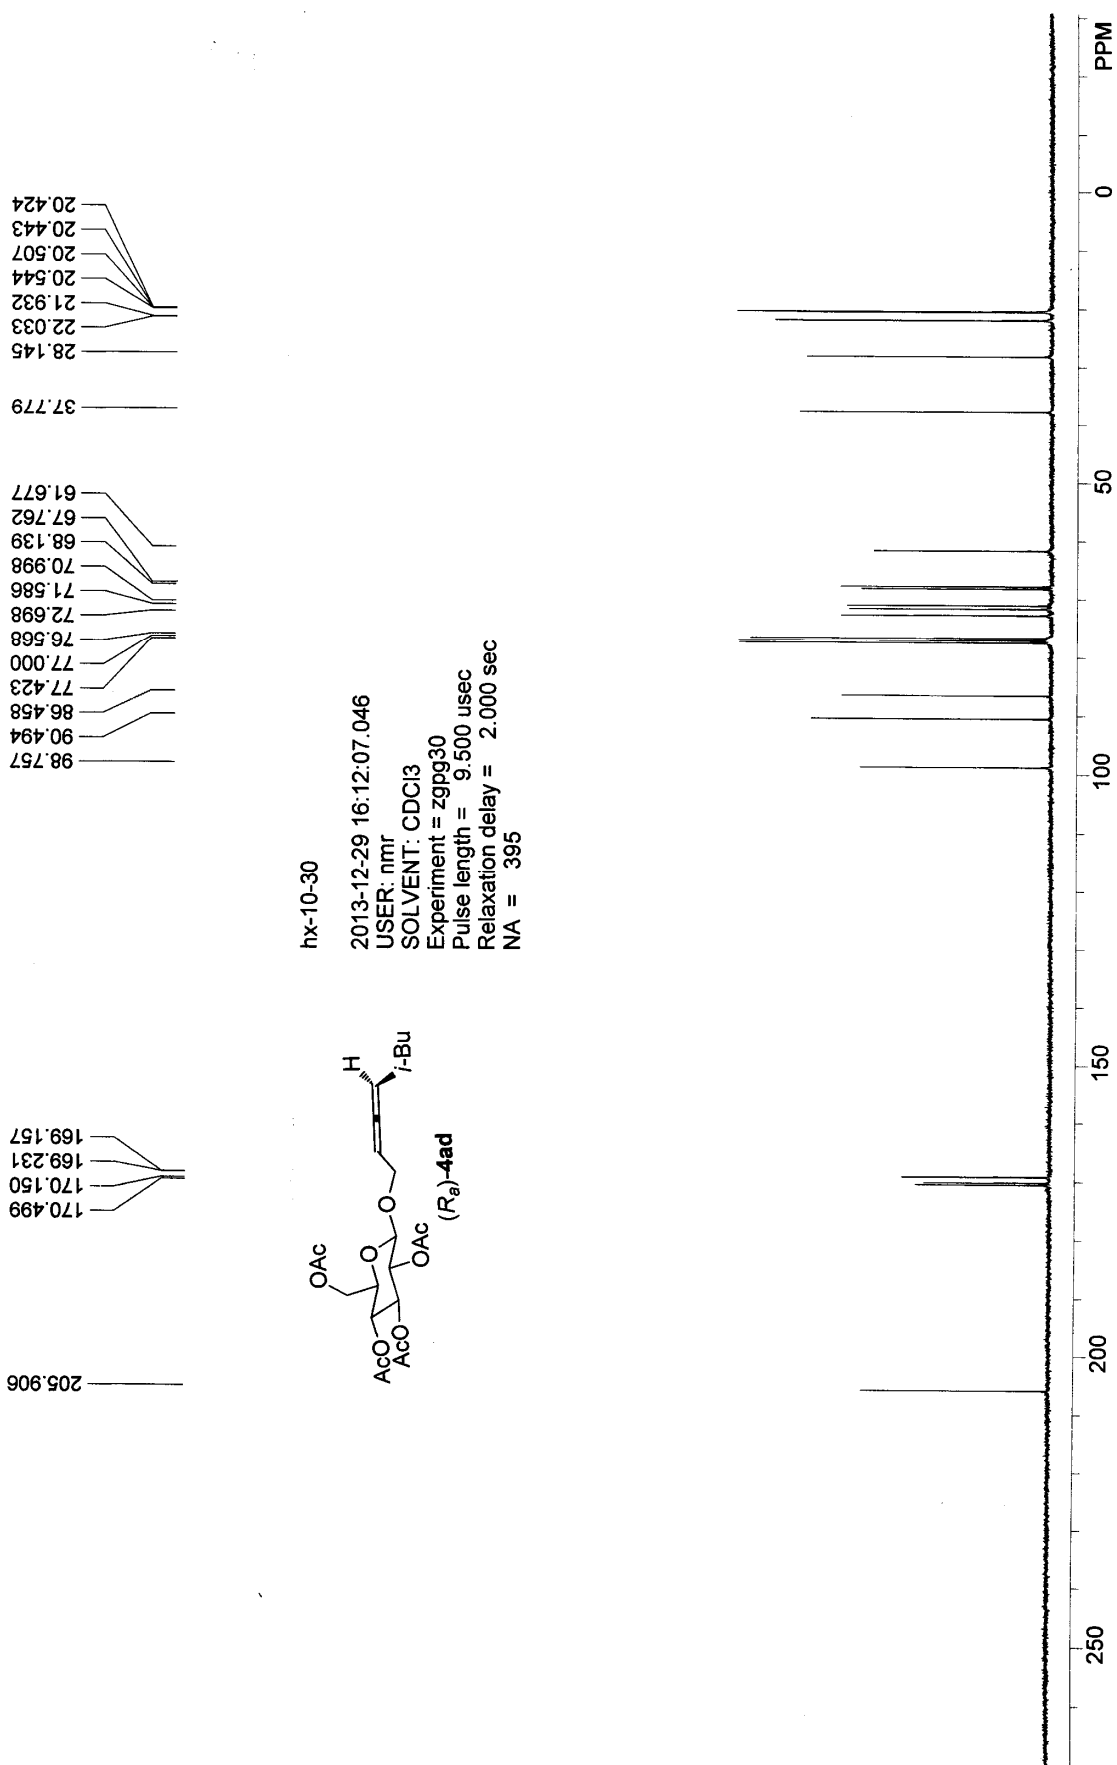

hx-10-30

2013-12-29 16:12:07.046

USER: nmr

SOLVENT: CDCl3

Experiment = zgpg30

Pulse length = 9.500 usec

Relaxation delay = 2.000 sec

NA = 395

# hx-10-30-ad-h-95-5-1-214

实验时间: 2014-01-07, 16:03:50

报告时间: 2014-01-09, 14:39:08

谱图文件: D:\zhuguangji\ong\hx\20140107\hx-10-30-ad-h-95-5-1-214..org

实验内容简介:

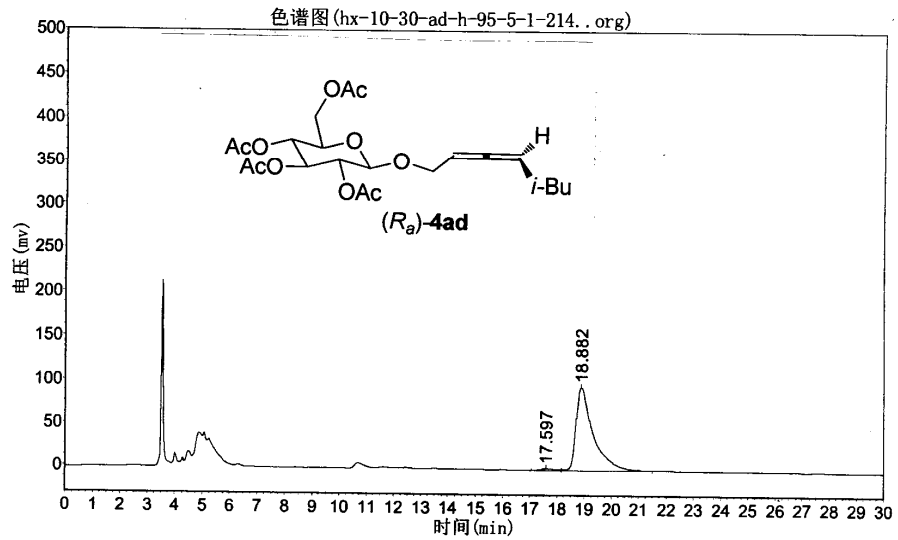

分析结果表

| 峰号 | 峰名 | 保留时间   | 峰高        | 峰面积         | 含量       |
|----|----|--------|-----------|-------------|----------|
| 1  |    | 17.597 | 1936.501  | 72566.539   | 1.7016   |
| 2  |    | 18.882 | 95601.313 | 4191978.500 | 98.2984  |
| 总计 |    |        | 97537.813 | 4264545.039 | 100.0000 |

# hx-8-95-ad-h-95-5-1-214

实验时间: 2014-01-07, 15:35:45

报告时间: 2014-01-09, 14:27:08

谱图文件: D:\zhuguangjiong\hx\20140107\hx-8-95-ad-h-95-5-1-214..org

实验内容简介:

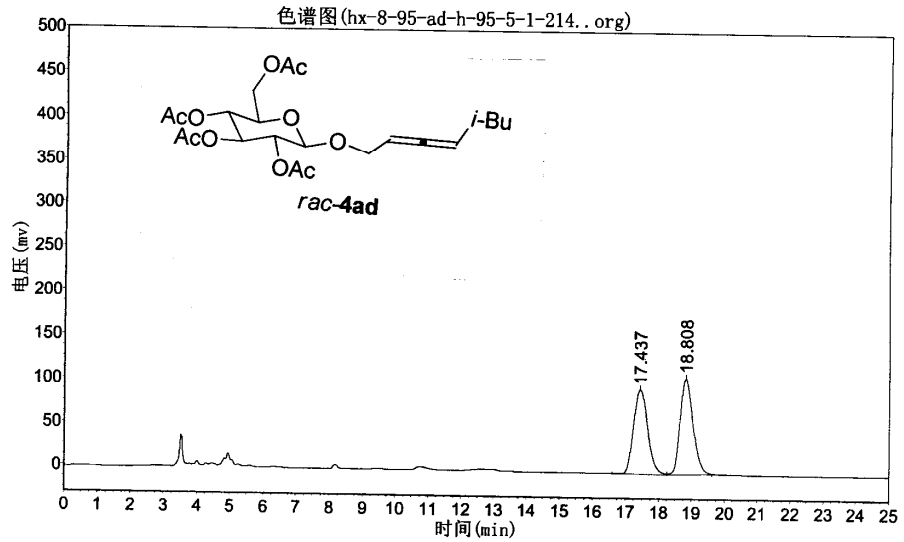

分析结果表

| 峰号 | 峰名 | 保留时间   | 峰高         | 峰面积         | 含量       |
|----|----|--------|------------|-------------|----------|
| 1  |    | 17.437 | 95504.164  | 2853676.250 | 49.2189  |
| 2  |    | 18.808 | 108893.492 | 2944248.500 | 50.7811  |
| 总计 |    |        | 204397.656 | 5797924.750 | 100.0000 |

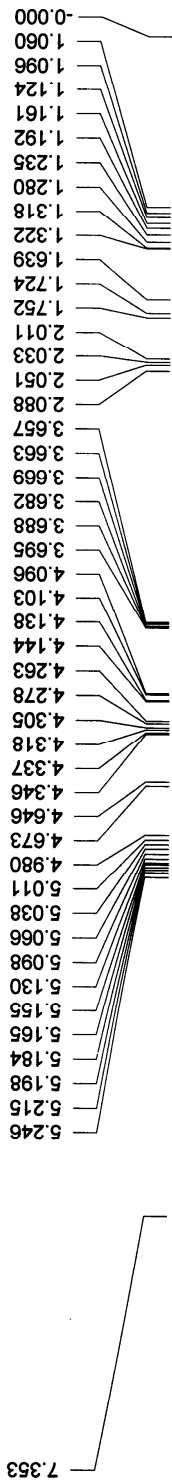

hx-10-34

2013-12-29 16:16:54.921

USER: nmr

SOLVENT: CDCl3

Experiment = zg30

Pulse length = 14.000 usec

Relaxation delay = 1.000 sec

NA = 8

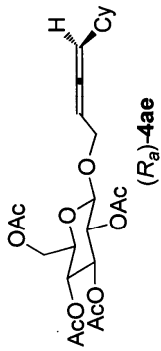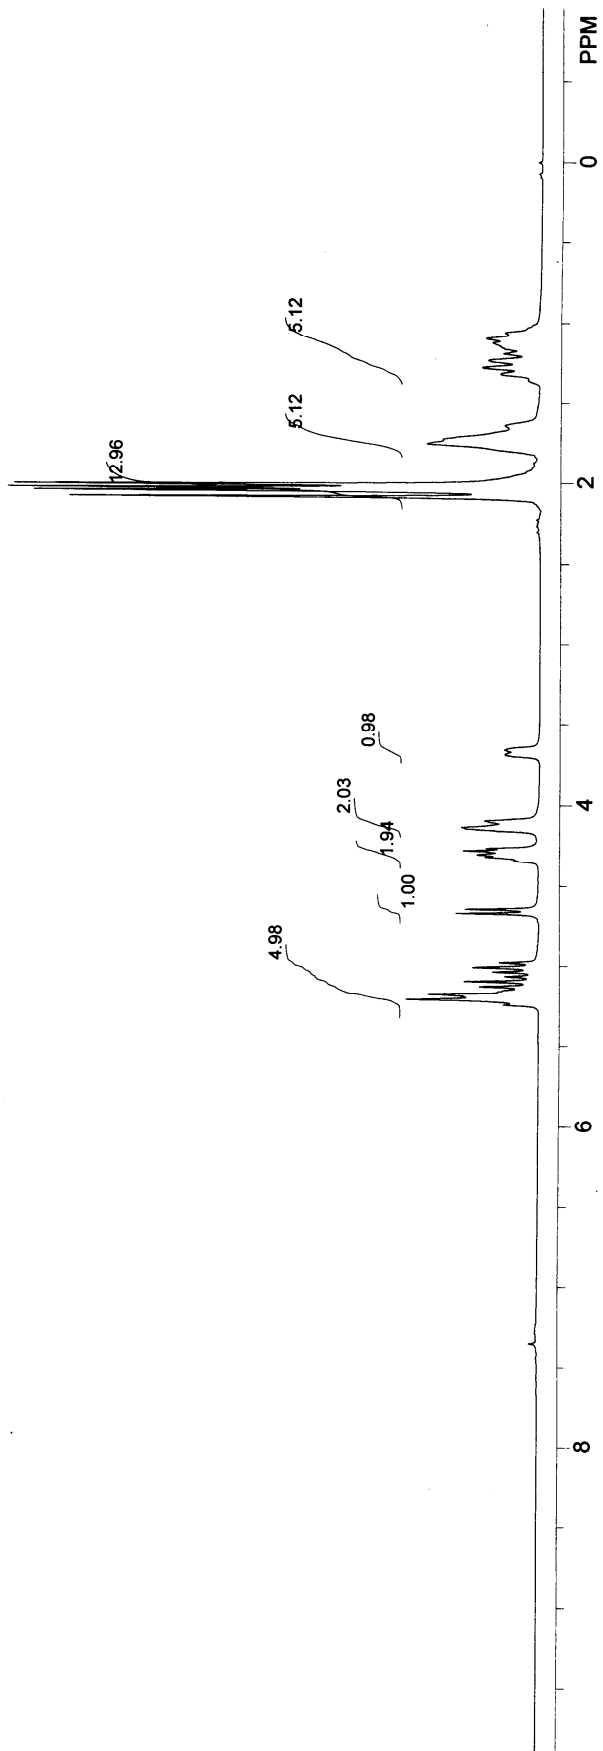

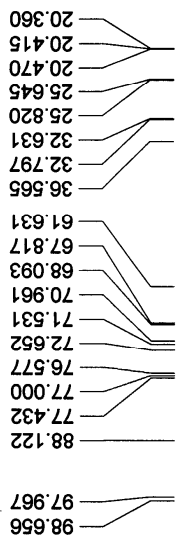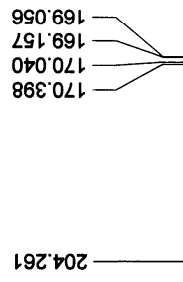

hx-10-34

2013-12-29 16:32:30.343  
 USER: nmr  
 SOLVENT: CDCl3  
 Experiment = zgpg30  
 Pulse length = 9.500 usec  
 Relaxation delay = 2.000 sec  
 NA = 243

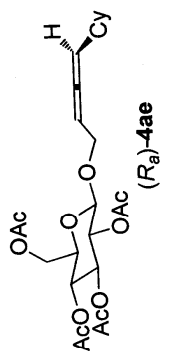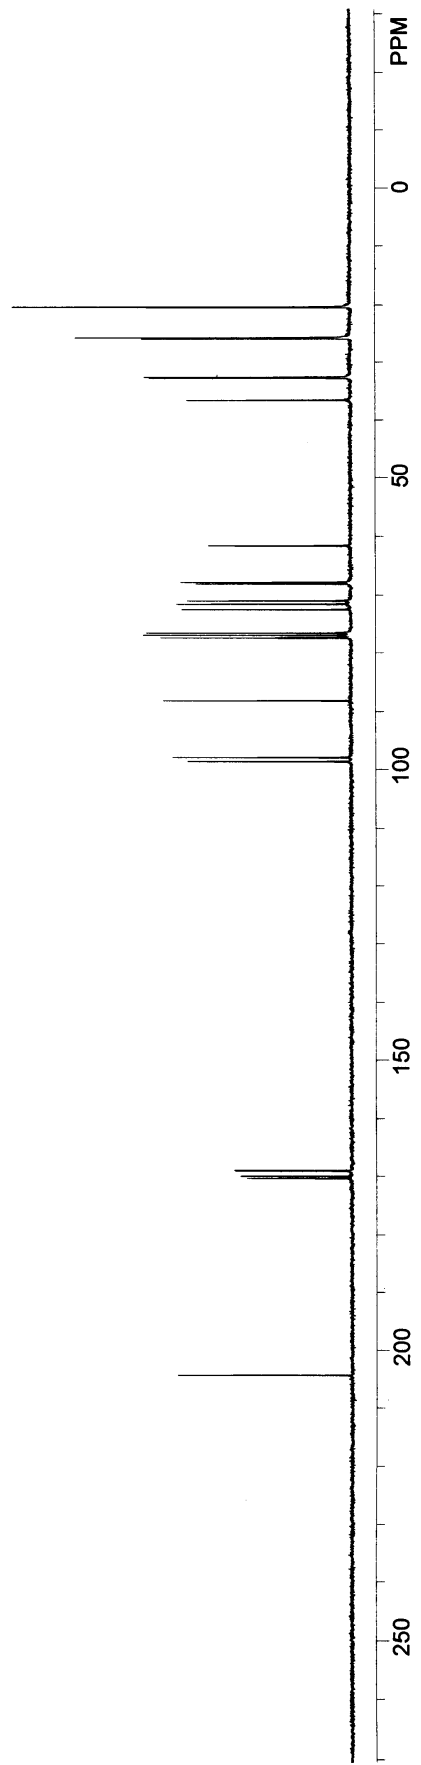

# hx-10-34-ad-h-95-5-1-214

实验时间: 2014-01-09, 9:40:47

报告时间: 2014-01-09, 14:25:43

谱图文件: D:\zhuguangjiong\hx\20140107\hx-10-34-ad-h-95-5-1-214.org

实验内容简介:

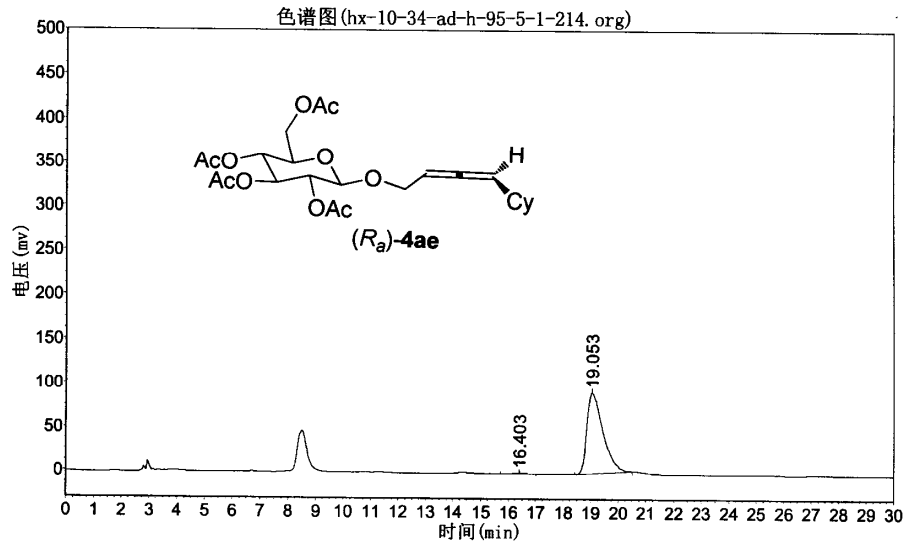

分析结果表

| 峰号 | 峰名 | 保留时间   | 峰高        | 峰面积         | 含量       |
|----|----|--------|-----------|-------------|----------|
| 1  |    | 16.403 | 819.081   | 25692.760   | 0.6863   |
| 2  |    | 19.053 | 91244.938 | 3717946.750 | 99.3137  |
| 总计 |    |        | 92064.018 | 3743639.510 | 100.0000 |

# hx-10-45-ad-h-95-5-1-214

实验时间: 2014-01-09, 8:50:28

报告时间: 2014-01-09, 14:23:55

谱图文件: D:\zhuguangjiong\hx\20140107\hx-10-45-ad-h-95-5-1-214...org

实验内容简介:

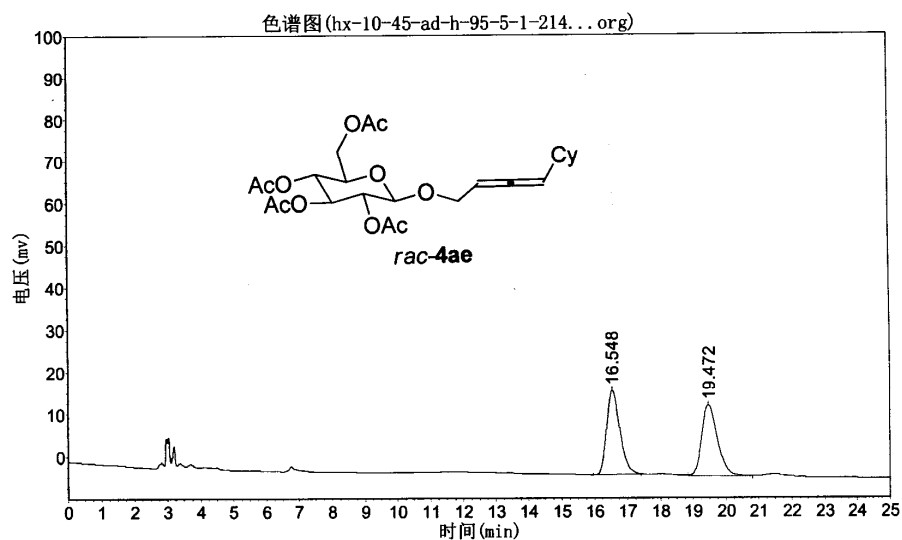

分析结果表

| 峰号 | 峰名 | 保留时间   | 峰高        | 峰面积         | 含量       |
|----|----|--------|-----------|-------------|----------|
| 1  |    | 16.548 | 19824.600 | 556005.563  | 49.9148  |
| 2  |    | 19.472 | 16627.025 | 557902.688  | 50.0852  |
| 总计 |    |        | 36451.625 | 1113908.250 | 100.0000 |

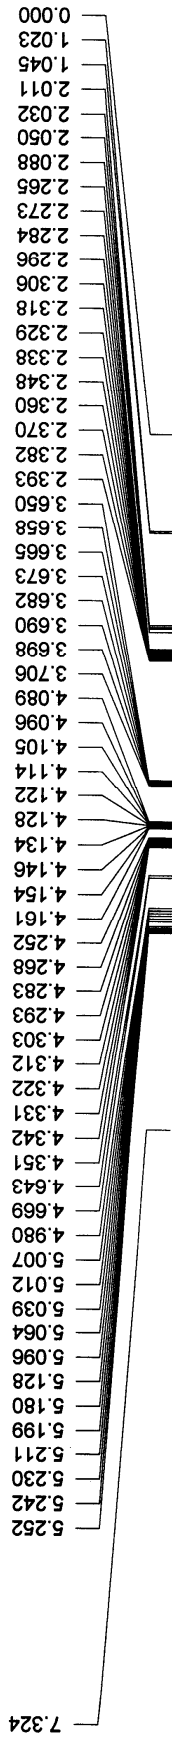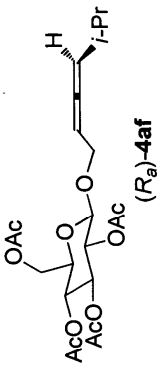

hx-10-40

2014-01-08 19:14:37.500

USER: nmr

SOLVENT: CDCl<sub>3</sub>

Experiment = zg30

Pulse length = 14.000 usec

Relaxation delay = 1.000 sec

NA = 11

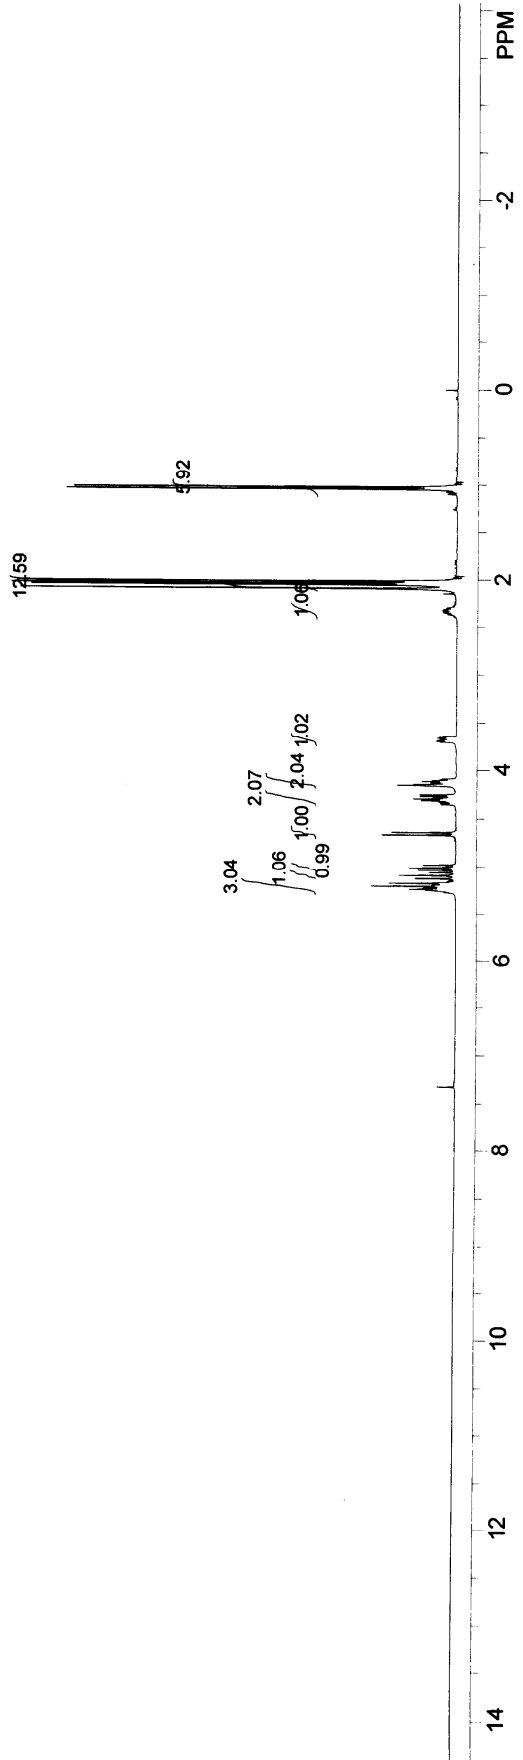



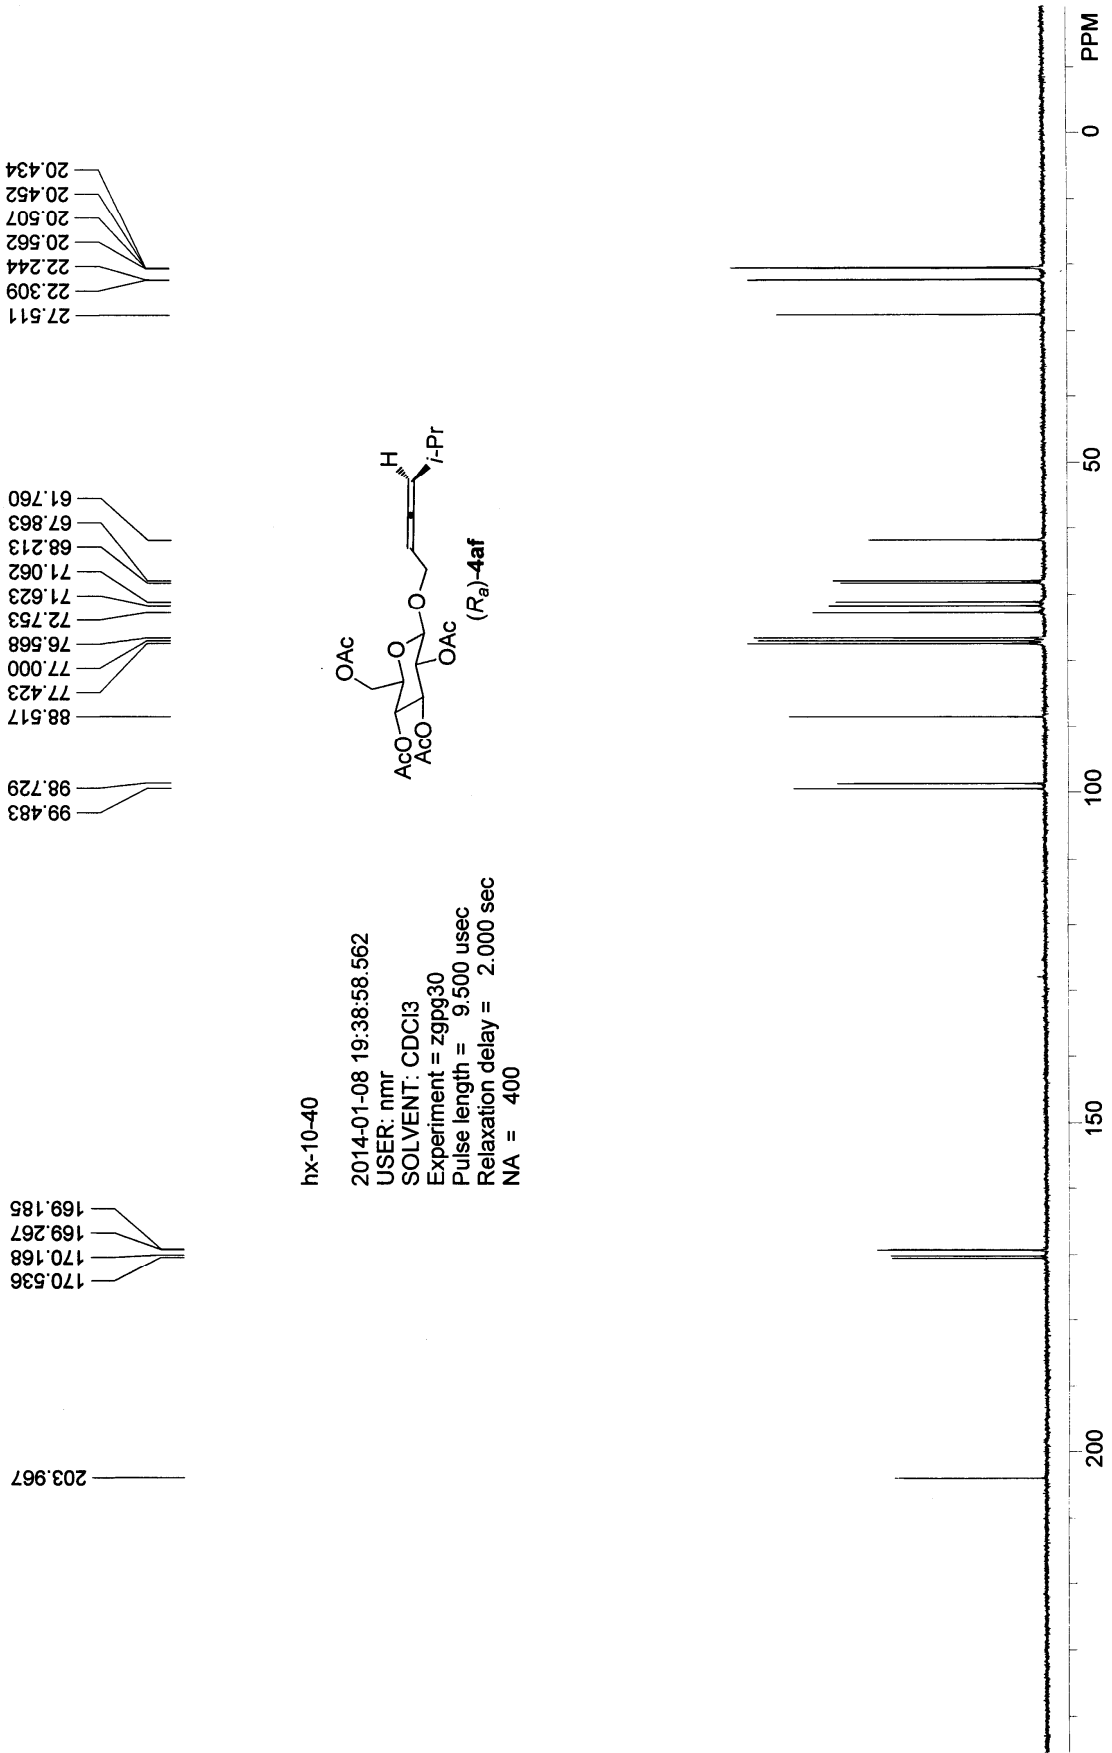

hx-10-40  
 2014-01-08 19:38:58.562  
 USER: nmr  
 SOLVENT: CDCl3  
 Experiment = zgpg30  
 Pulse length = 9.500 usec  
 Relaxation delay = 2.000 sec  
 NA = 400

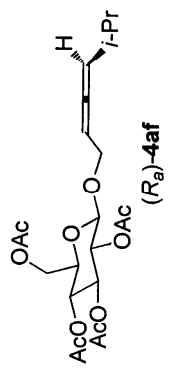

# hx-10-40-ia-h-95-5-1-214

实验时间: 2014-01-08, 9:59:07

报告时间: 2014-01-09, 14:41:52

谱图文件: D:\zhuguangjiong\hx\20140107\hx-10-40-ia-h-95-5-1-214...org

实验内容简介:

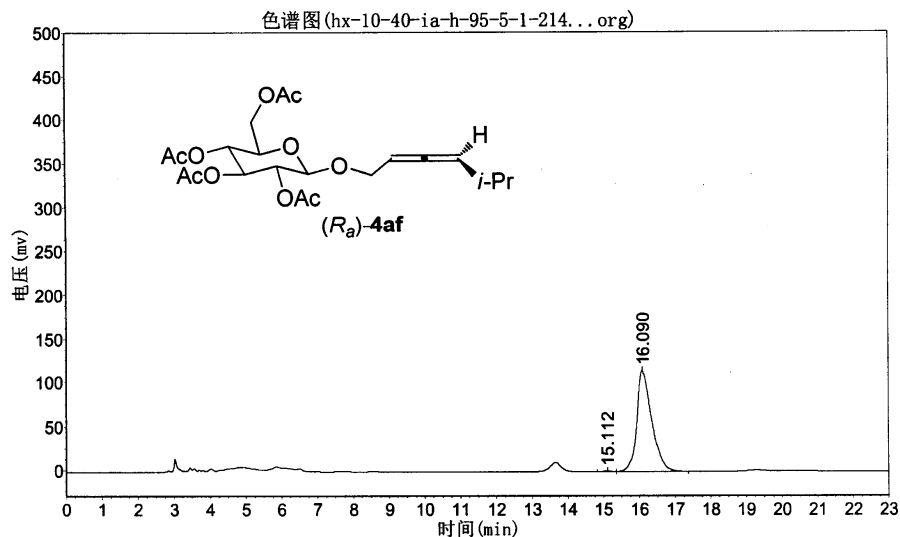

分析结果表

| 峰号 | 峰名 | 保留时间   | 峰高         | 峰面积         | 含量       |
|----|----|--------|------------|-------------|----------|
| 1  |    | 15.112 | 661.322    | 13353.986   | 0.3981   |
| 2  |    | 16.090 | 113967.414 | 3341092.000 | 99.6019  |
| 总计 |    |        | 114628.736 | 3354445.986 | 100.0000 |

# hx-8-113-ia-h-95-5-1-214

实验时间: 2014-01-08, 9:04:28

报告时间: 2014-01-09, 14:40:49

谱图文件: D:\zhuguangji\hx\20140107\hx-8-113-ia-h-95-5-1-214.org

实验内容简介:

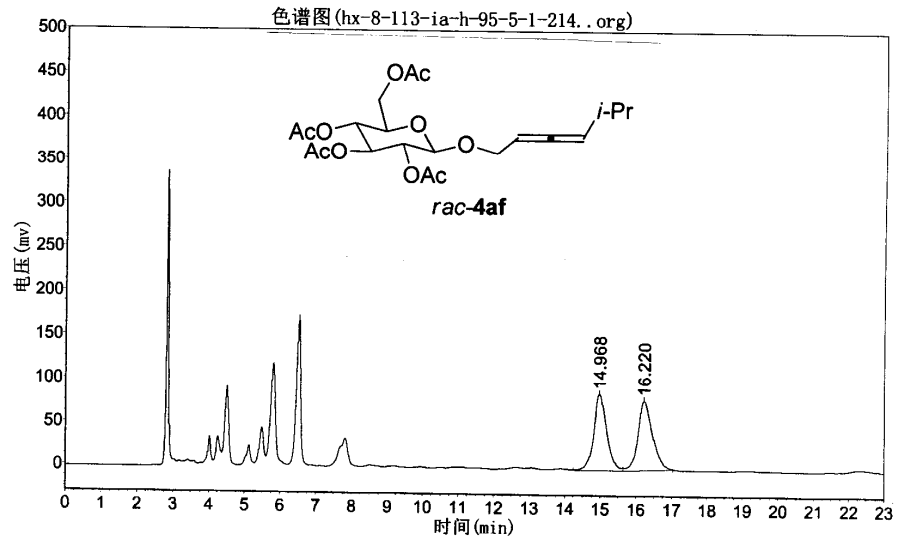

分析结果表

| 峰号 | 峰名 | 保留时间   | 峰高         | 峰面积         | 含量       |
|----|----|--------|------------|-------------|----------|
| 1  |    | 14.968 | 87313.367  | 2211914.500 | 49.7424  |
| 2  |    | 16.220 | 79058.297  | 2234822.250 | 50.2576  |
| 总计 |    |        | 166371.664 | 4446736.750 | 100.0000 |

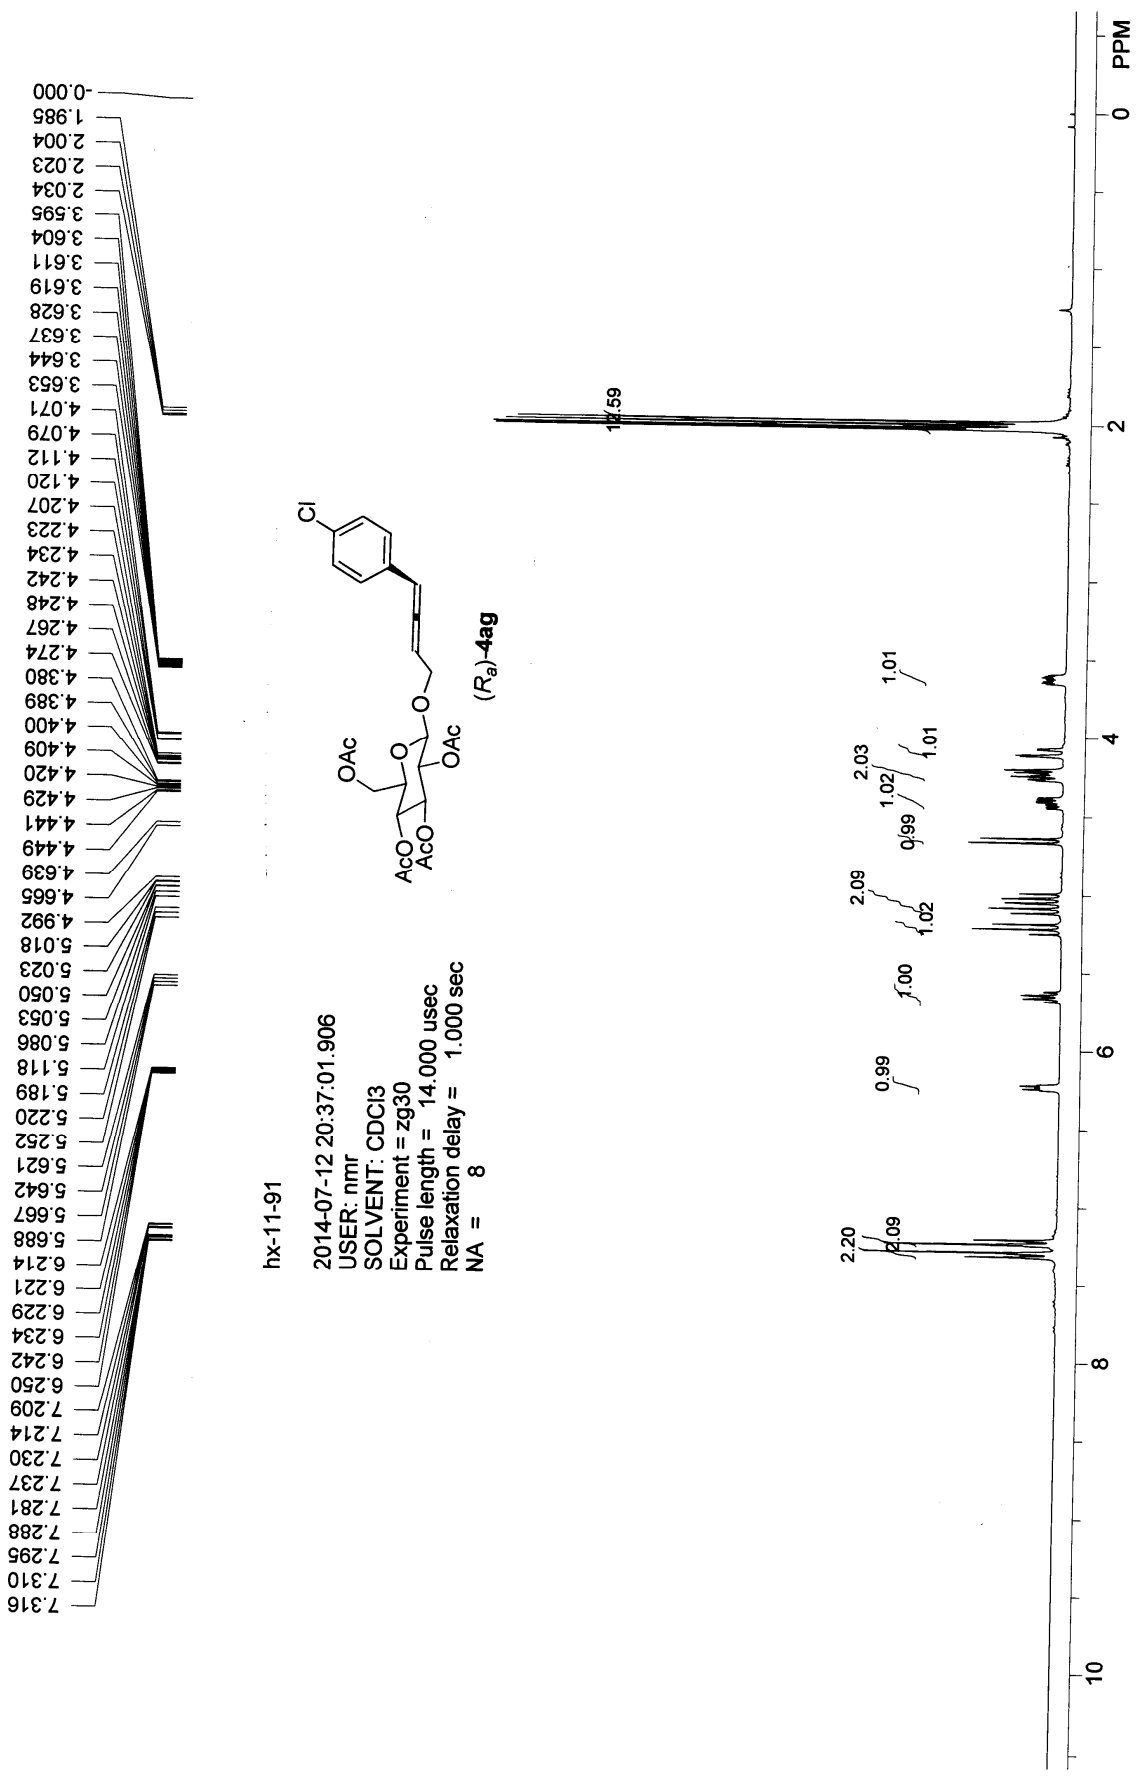

hx-11-91

2014-07-12 20:37:01.906  
 USER: nmr  
 SOLVENT: CDCl3  
 Experiment = zg30  
 Pulse length = 14.000 usec  
 Relaxation delay = 1.000 sec  
 NA = 8

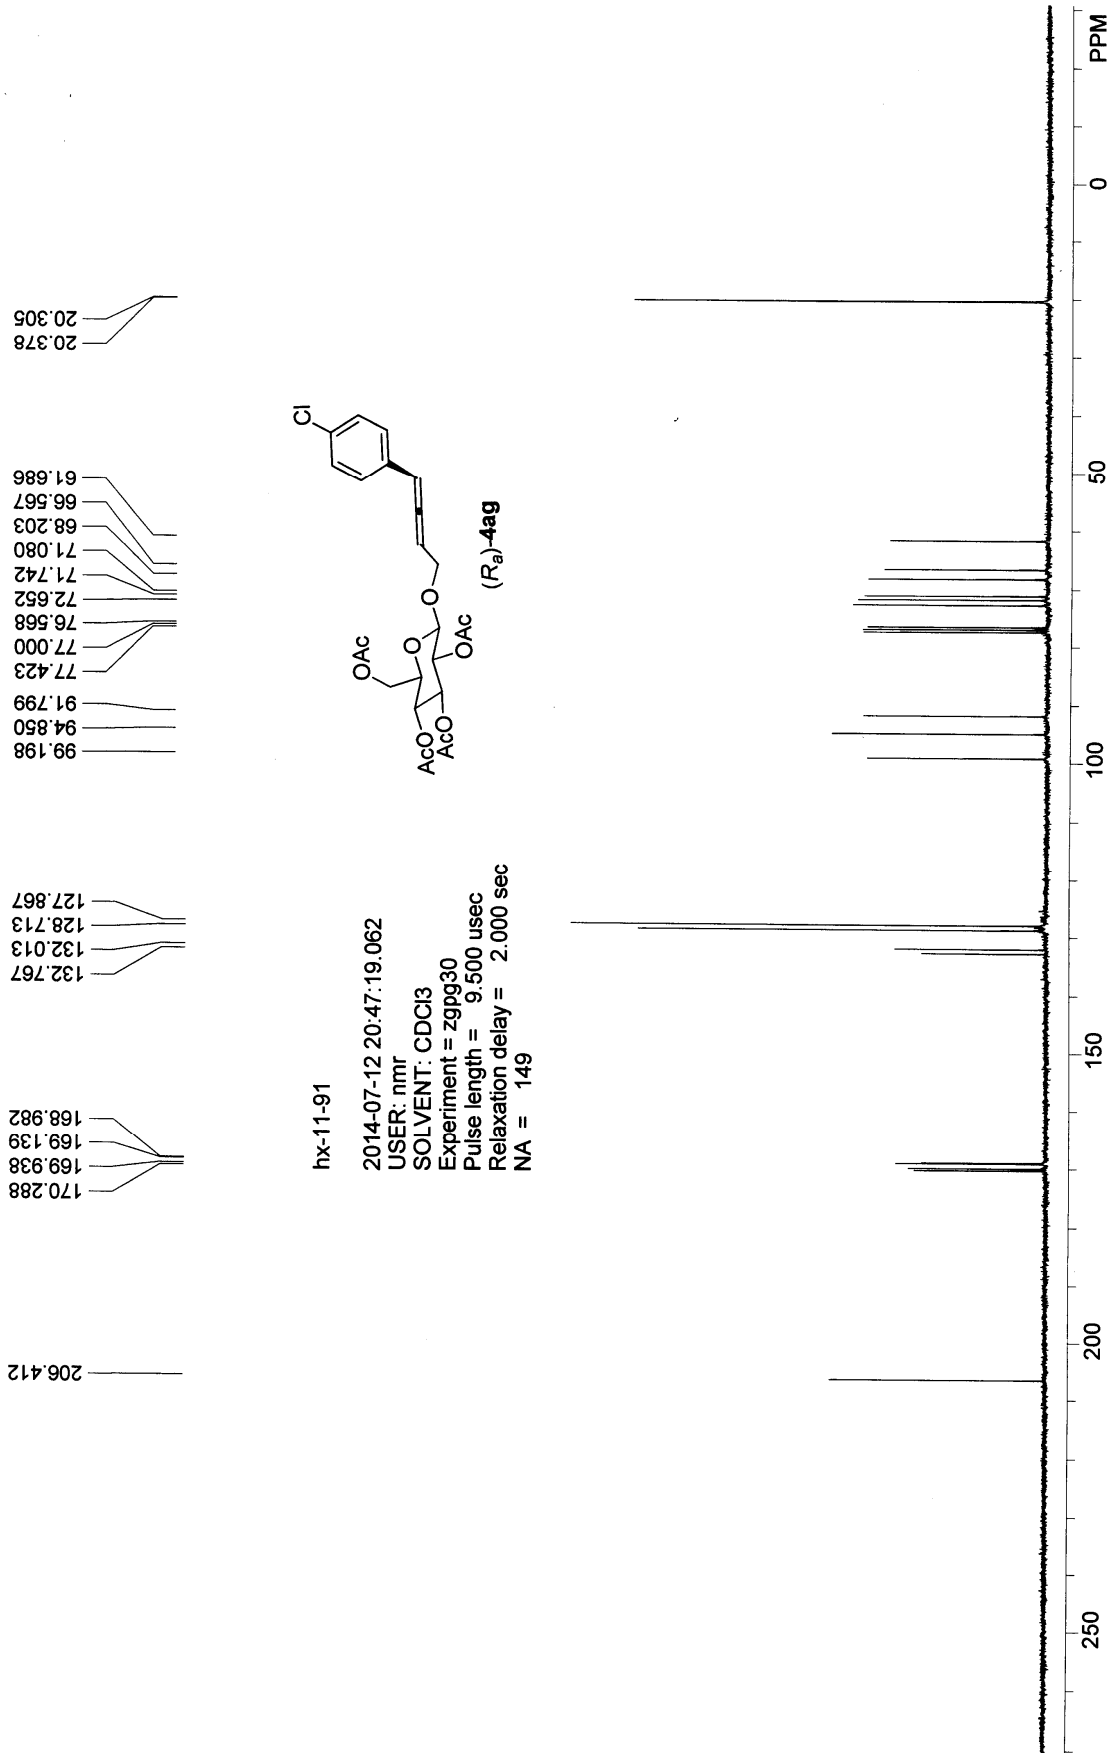

lx-11-91

2014-07-12 20:47:19.062

USER: nmr

SOLVENT: CDCl3

Experiment = zgpg30

Pulse length = 9.500 usec

Relaxation delay = 2.000 sec

NA = 149

hx-11-91

实验单位: zju  
 实验时间: 2014-07-13, 12:15:35  
 谱图文件: D:\浙大智达\N2000\样品\B0306.org

实验者: hx  
 报告时间: 2014-07-13, 13:38:35  
 积分方法: 面积归一法

实验内容简介:  
 AD-H column, n-hexane/iPrOH = 95/5, 214 nm, 0.6 ml/min

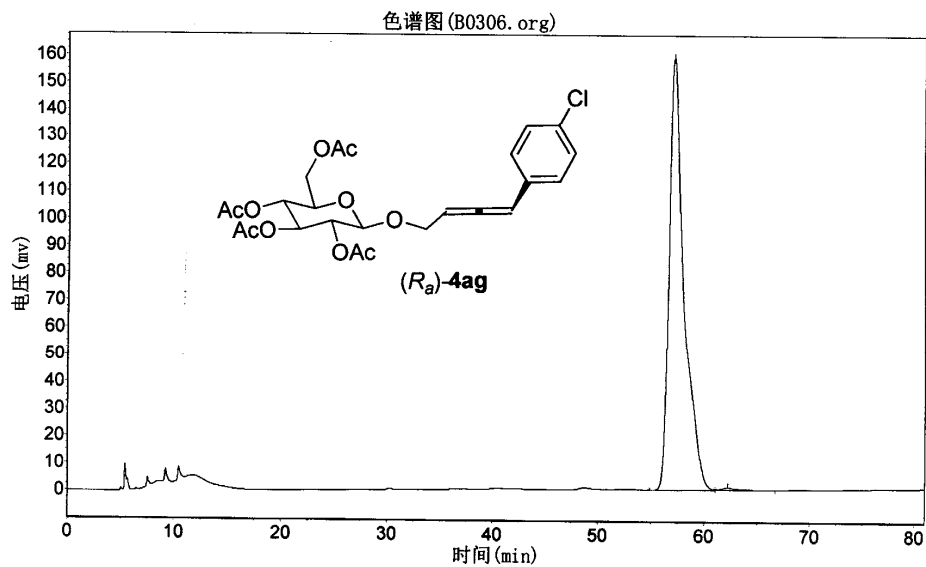

分析结果表

| 峰号 | 峰名 | 保留时间   | 峰高         | 峰面积          | 含量       |
|----|----|--------|------------|--------------|----------|
| 1  |    | 57.147 | 158217.703 | 15314433.000 | 99.4761  |
| 2  |    | 62.250 | 812.018    | 80649.086    | 0.5239   |
| 总计 |    |        | 159029.722 | 15395082.086 | 100.0000 |

hx-11-88

实验单位: zju  
 实验时间: 2014-07-13, 13:39:59  
 谱图文件: D:\浙大智达\N2000\样品\B0307.org

实验者: hx  
 报告时间: 2014-07-13, 14:59:12  
 积分方法: 面积归一法

实验内容简介:  
 AD-H column, n-hexane/iPrOH = 95/5, 214 nm, 0.6 ml/min

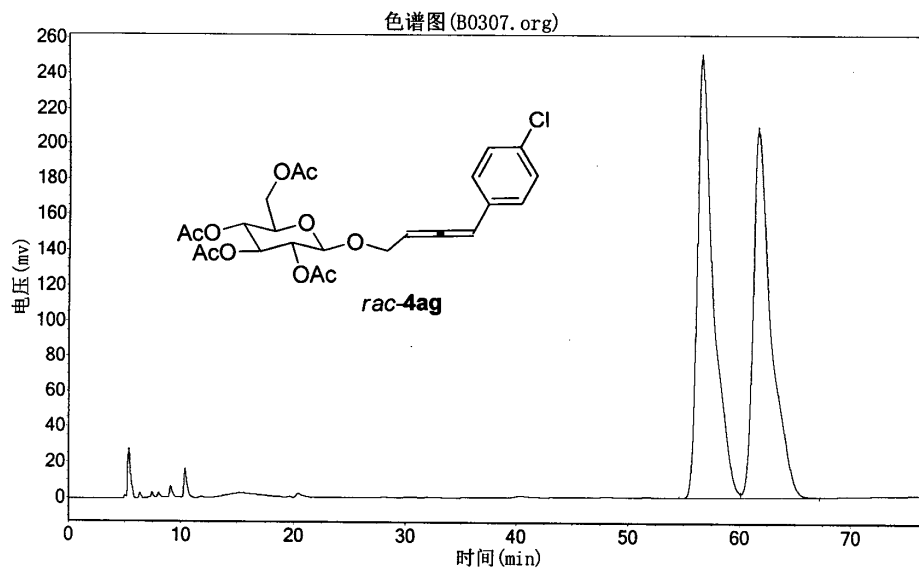

分析结果表

| 峰号 | 峰名 | 保留时间   | 峰高         | 峰面积          | 含量       |
|----|----|--------|------------|--------------|----------|
| 1  |    | 56.707 | 248123.828 | 24632214.000 | 51.8366  |
| 2  |    | 61.752 | 206067.656 | 22886768.000 | 48.1634  |
| 总计 |    |        | 454191.484 | 47518982.000 | 100.0000 |

2014-07-13

浙江大学智能信息研究所

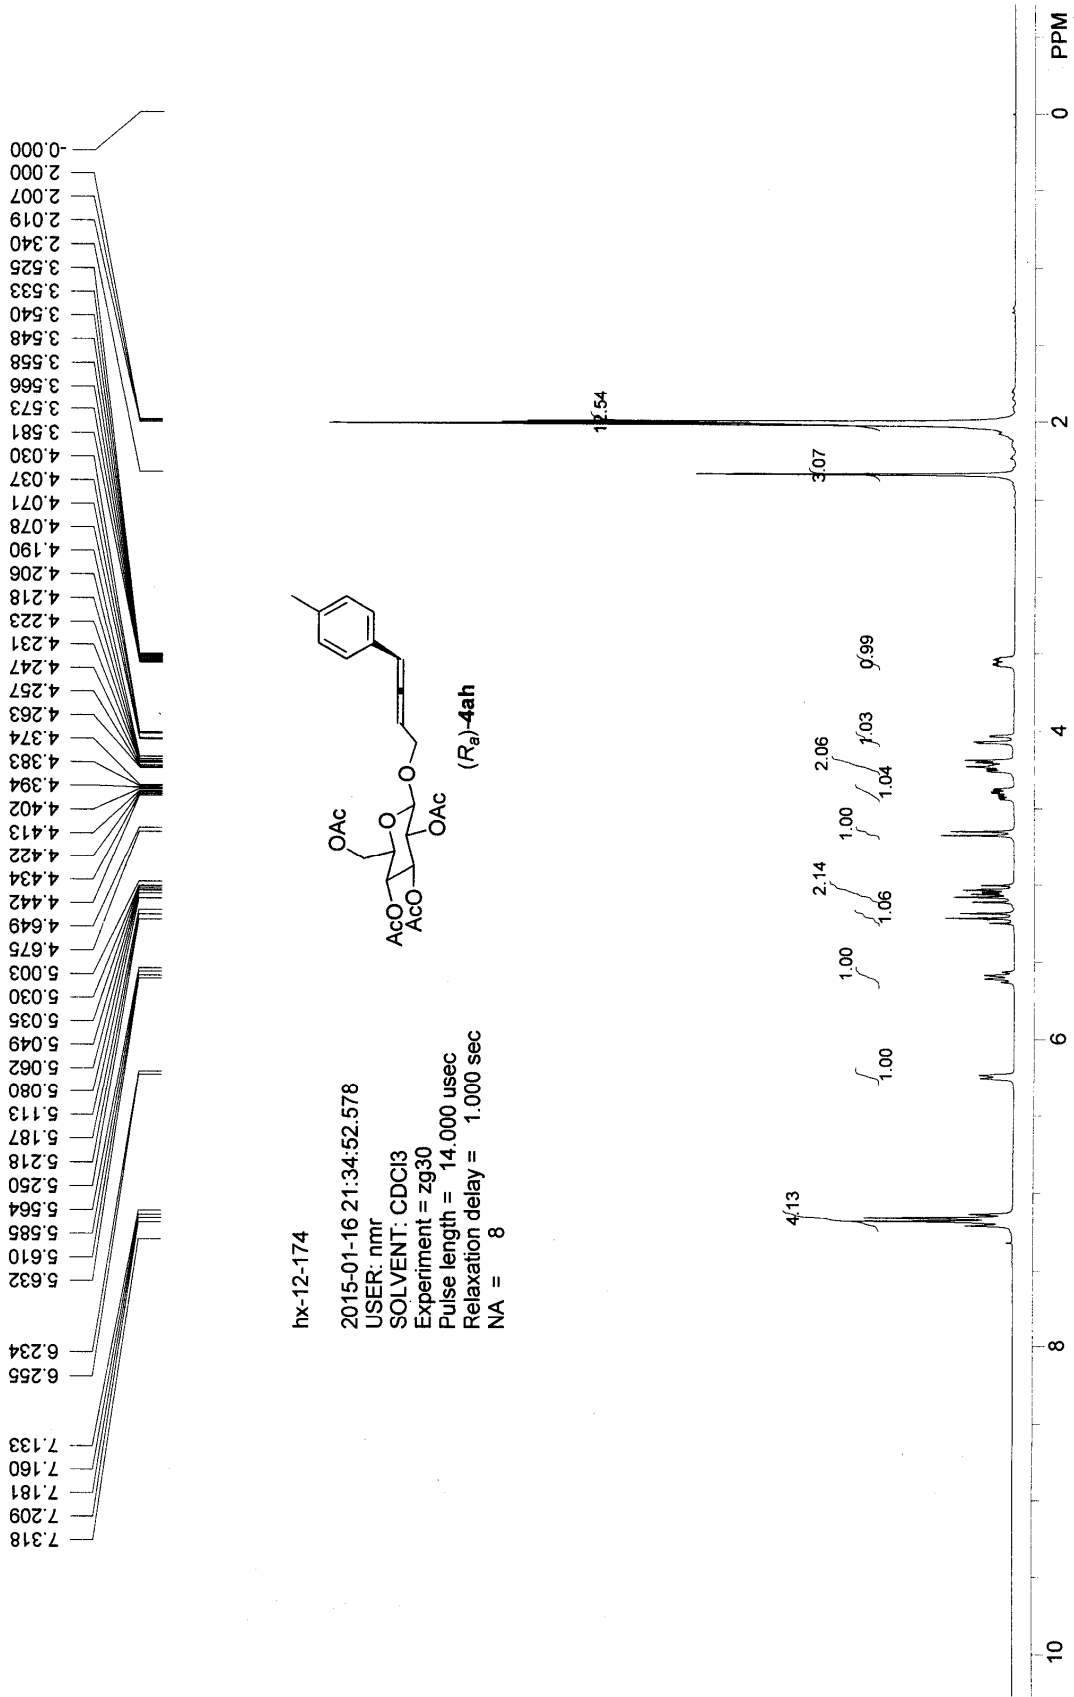



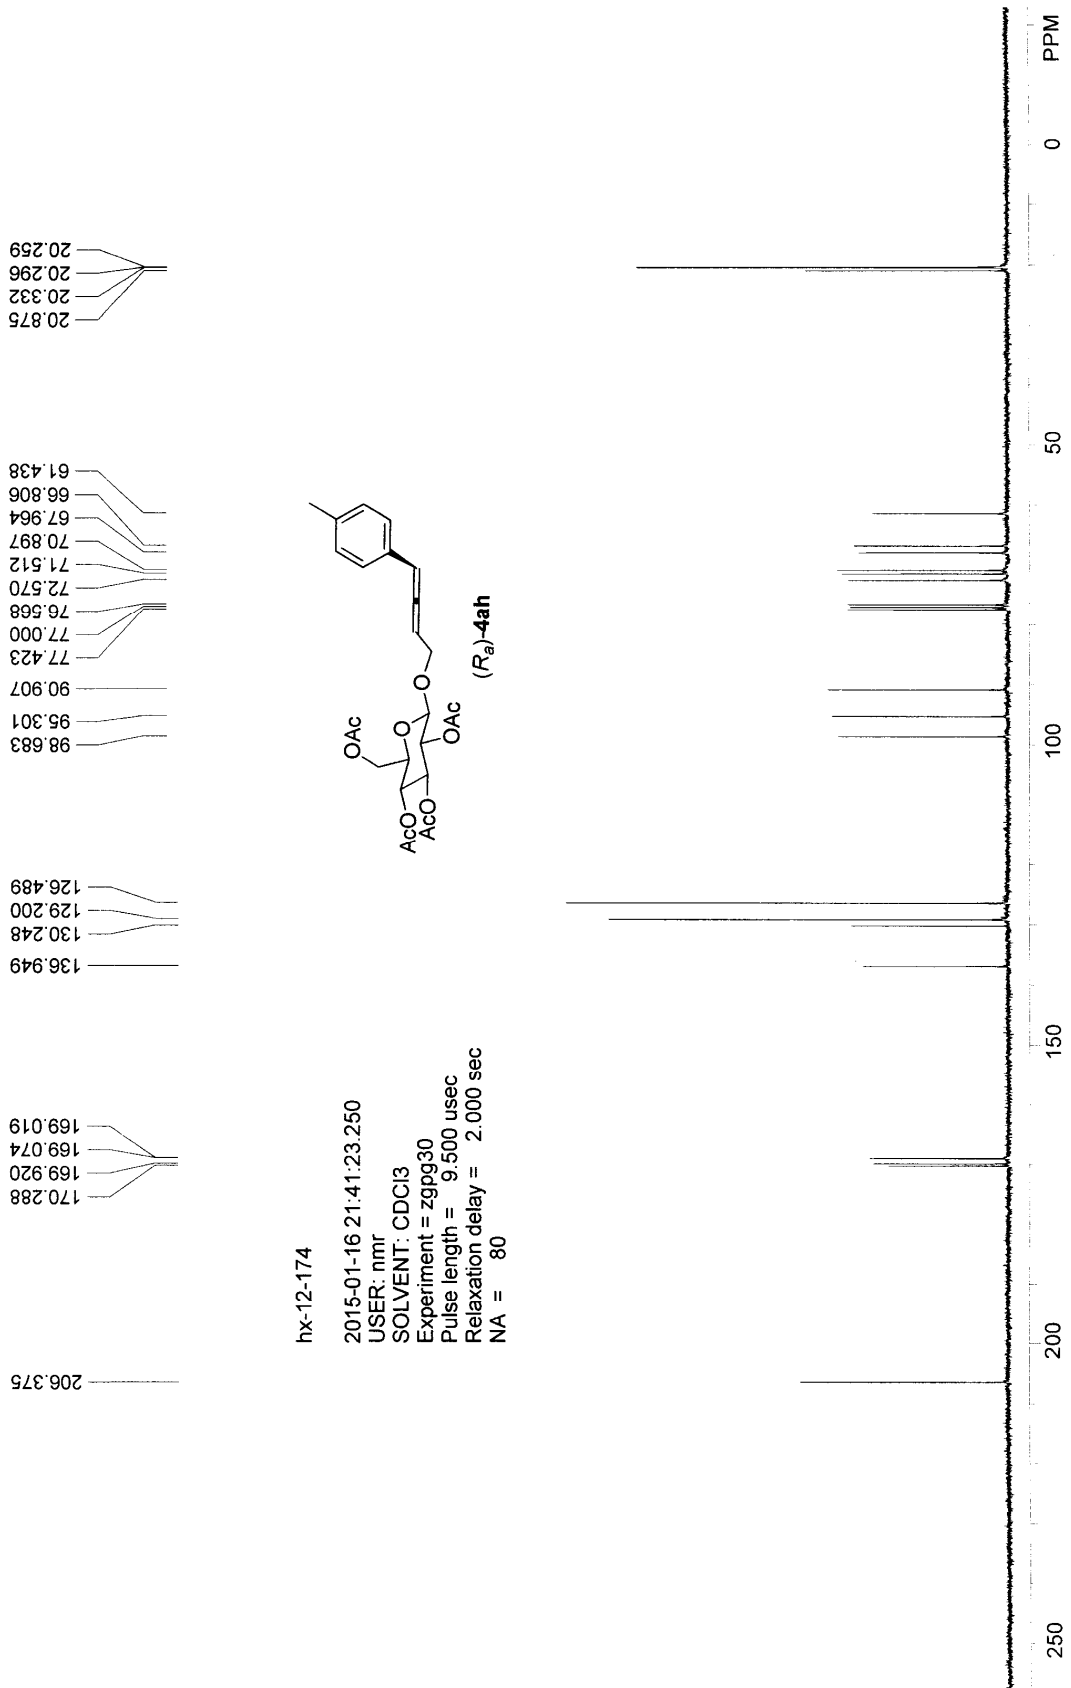

hx-12-174

2015-01-16 21:41:23.250

USER: nmr

SOLVENT: CDCl3

Experiment = zgpg30

Pulse length = 9.500 usec

Relaxation delay = 2.000 sec

NA = 80

hx-12-174

实验单位: zju  
 实验时间: 2015-01-18, 11:47:09  
 谱图文件: D:\浙大智达\N2000\样品\B0700.org

实验者: hx  
 报告时间: 2015-01-19, 10:17:03  
 积分方法: 面积归一法

实验内容简介:  
 AD-H, n-hexane1/i-PrOH = 94/6, 214 nm, 0.6 ml/min

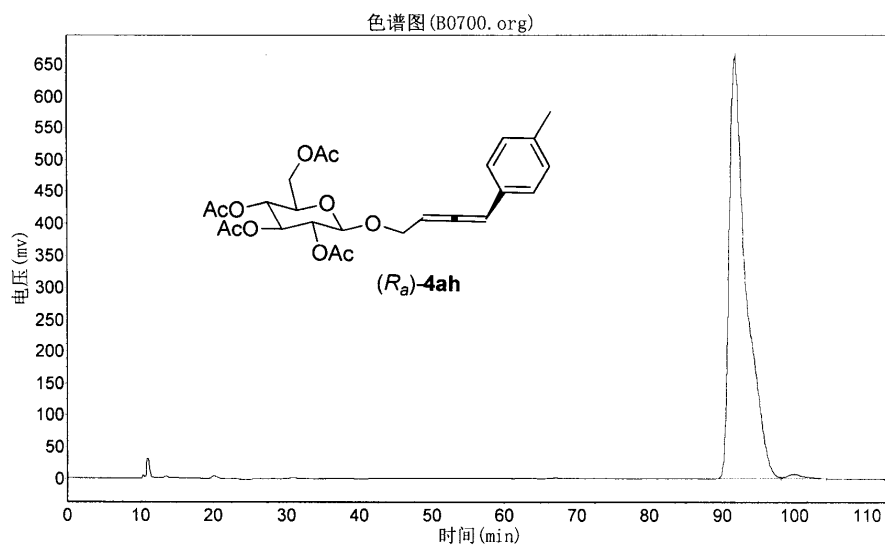

分析结果表

| 峰号 | 峰名 | 保留时间   | 峰高         | 峰面积           | 含量       |
|----|----|--------|------------|---------------|----------|
| 1  |    | 91.860 | 662101.313 | 107778720.000 | 98.8298  |
| 2  |    | 99.942 | 7587.738   | 1276131.375   | 1.1702   |
| 总计 |    |        | 669689.051 | 109054851.375 | 100.0000 |

hx-12-175

实验单位: zju  
 实验时间: 2015-01-18, 9:42:47  
 谱图文件: D:\浙大智达\N2000\样品\B0699.org

实验者: hx  
 报告时间: 2015-01-19, 10:15:16  
 积分方法: 面积归一法

实验内容简介:  
 AD-H, n-hexane/i-PrOH = 94/6, 214 nm, 0.6 ml/min

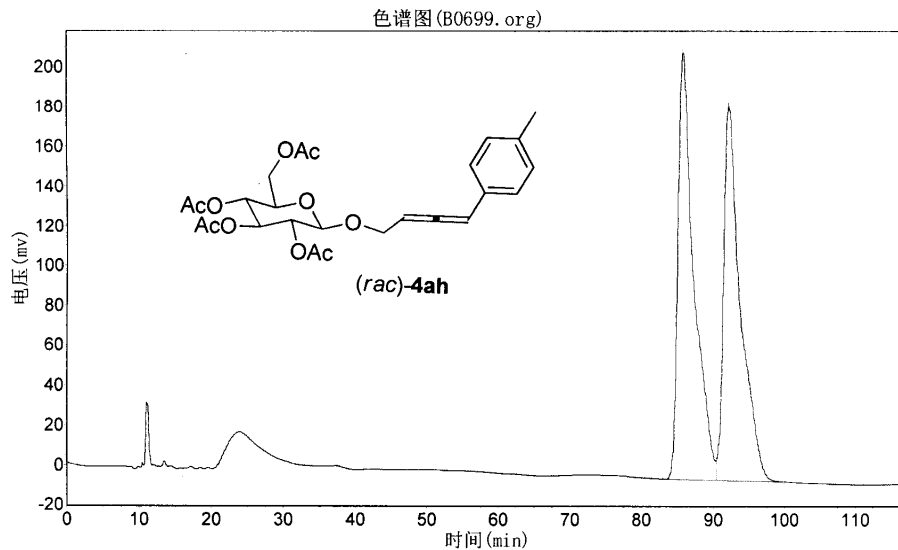

分析结果表

| 峰号 | 峰名 | 保留时间   | 峰高         | 峰面积          | 含量       |
|----|----|--------|------------|--------------|----------|
| 1  |    | 85.940 | 214032.500 | 33073264.000 | 51.9456  |
| 2  |    | 92.350 | 187784.531 | 30595828.000 | 48.0544  |
| 总计 |    |        | 401817.031 | 63669092.000 | 100.0000 |

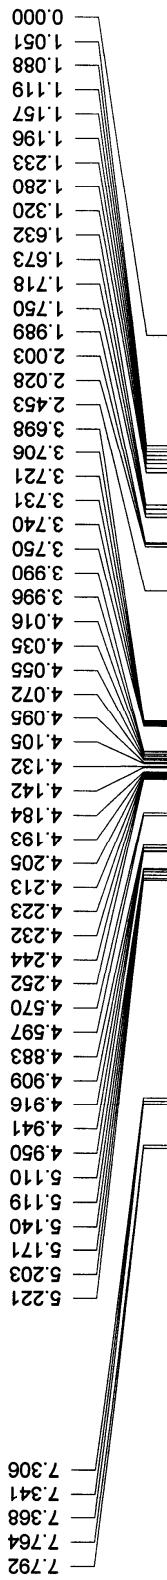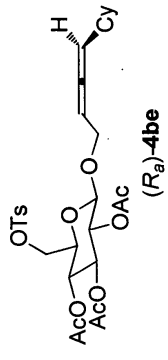

hx-10-57

2014-01-13 19:27:05.484

USER: nmr

SOLVENT: CDCl<sub>3</sub>

Experiment = zg30

Pulse length = 14.000 usec

Relaxation delay = 1.000 sec

NA = 11

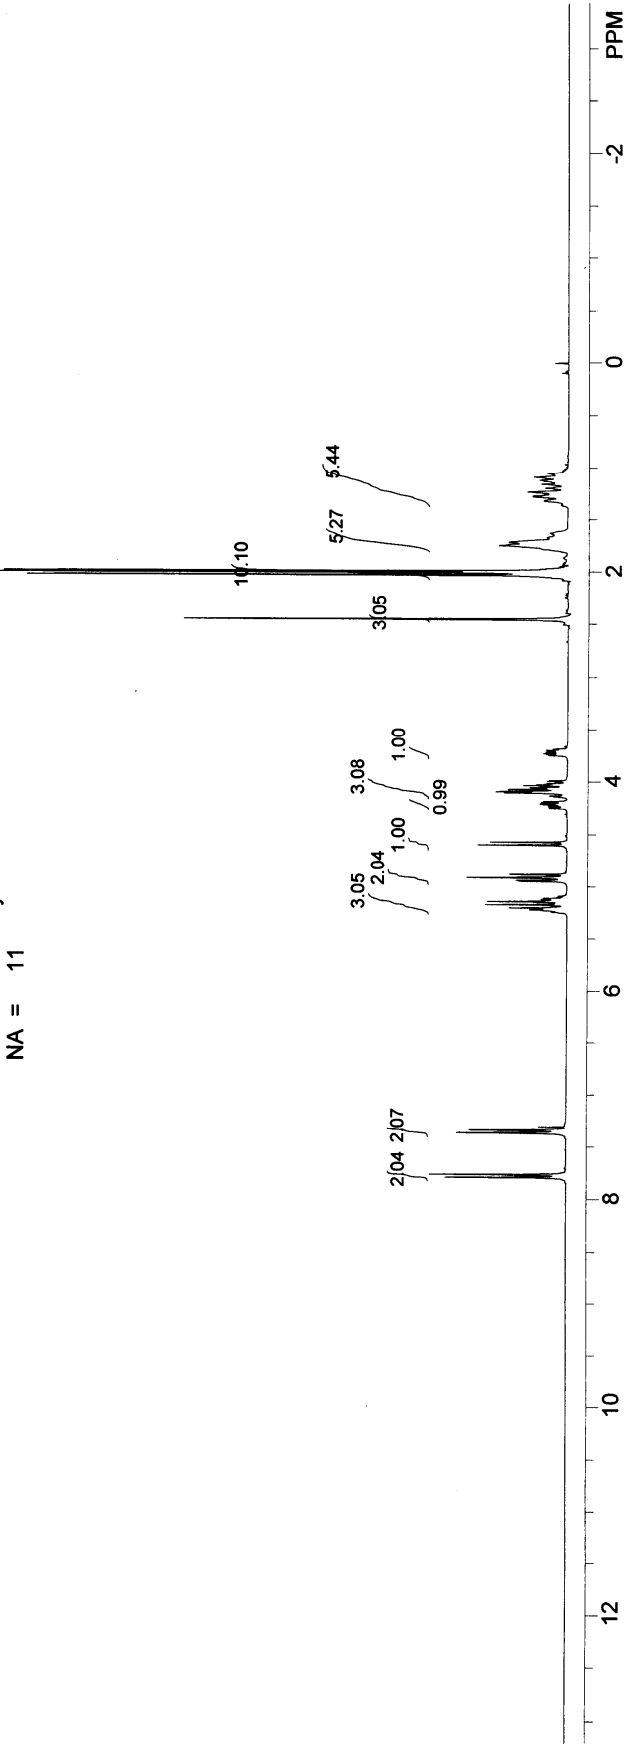

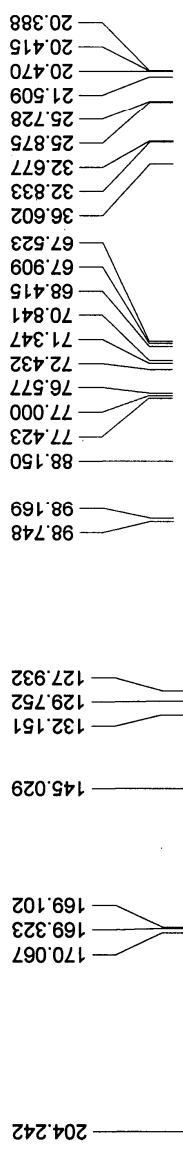

hx-10-57

2014-01-13 19:43:21.953  
 USER: nmr  
 SOLVENT: CDCl3  
 Experiment = zgpg30  
 Pulse length = 9.500 usec  
 Relaxation delay = 2.000 sec  
 NA = 260

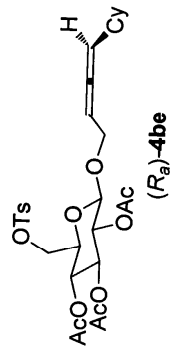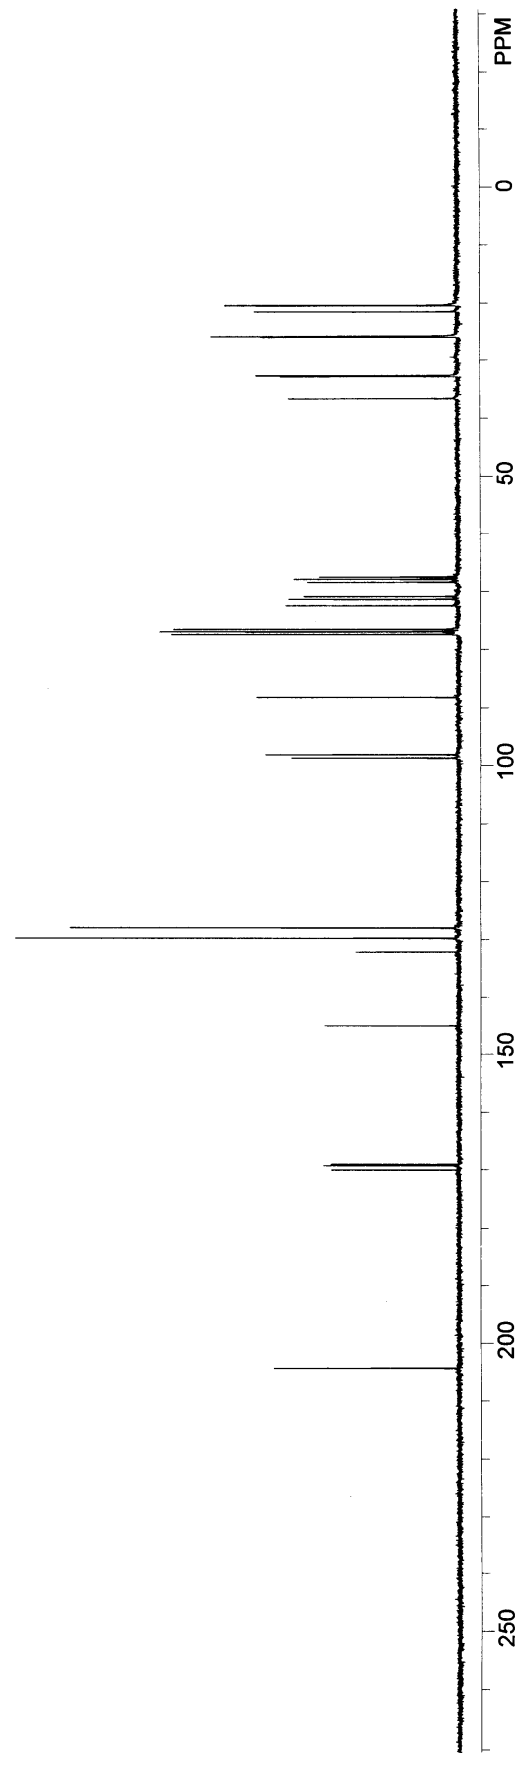

# hx-10-57-ia-80-20-1-214

实验时间: 2014-01-15, 12:33:45

报告时间: 2014-01-17, 15:25:24

谱图文件: D:\zhuguangjiong\hx\20140115\hx-10-57-ia-80-20-1-214.org

实验内容简介:

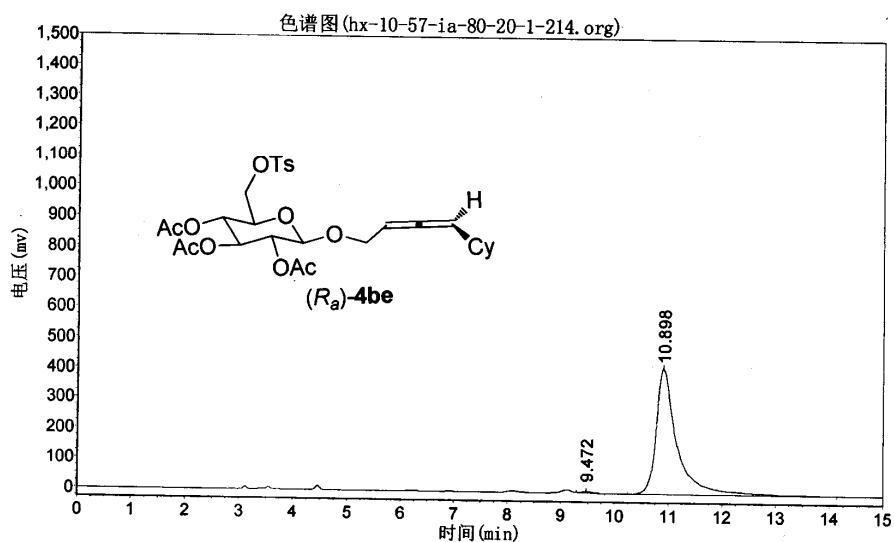

分析结果表

| 峰号 | 峰名 | 保留时间   | 峰高         | 峰面积          | 含量       |
|----|----|--------|------------|--------------|----------|
| 1  |    | 9.472  | 4041.587   | 49915.180    | 0.4298   |
| 2  |    | 10.898 | 417859.031 | 11564718.000 | 99.5702  |
| 总计 |    |        | 421900.619 | 11614633.180 | 100.0000 |

# hx-8-100-ia-80-20-1-214

实验时间: 2014-01-15, 11:39:33

报告时间: 2014-01-17, 15:24:12

谱图文件: D:\zhuguangjiong\hx\20140115\hx-8-100-ia-80-20-1-214.org

实验内容简介:

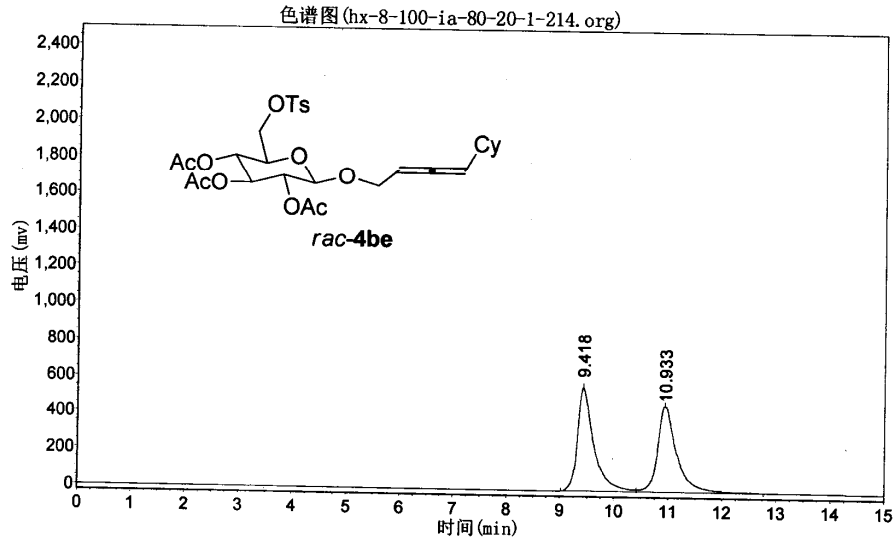

分析结果表

| 峰号 | 峰名 | 保留时间   | 峰高          | 峰面积          | 含量       |
|----|----|--------|-------------|--------------|----------|
| 1  |    | 9.418  | 566933.063  | 11880676.000 | 50.9917  |
| 2  |    | 10.933 | 464119.688  | 11418548.000 | 49.0083  |
| 总计 |    |        | 1031052.750 | 23299224.000 | 100.0000 |

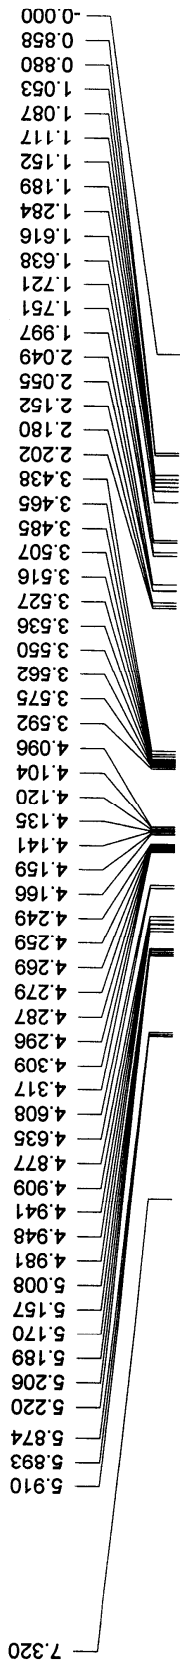

hx-10-56

2014-01-07 14:22:19.406

USER: nmr

SOLVENT: CDCl3

Experiment = zg30

Pulse length = 14.000 usec

Relaxation delay = 1.000 sec

NA = 8

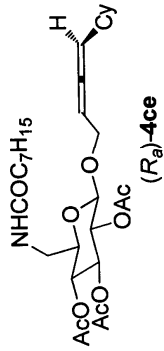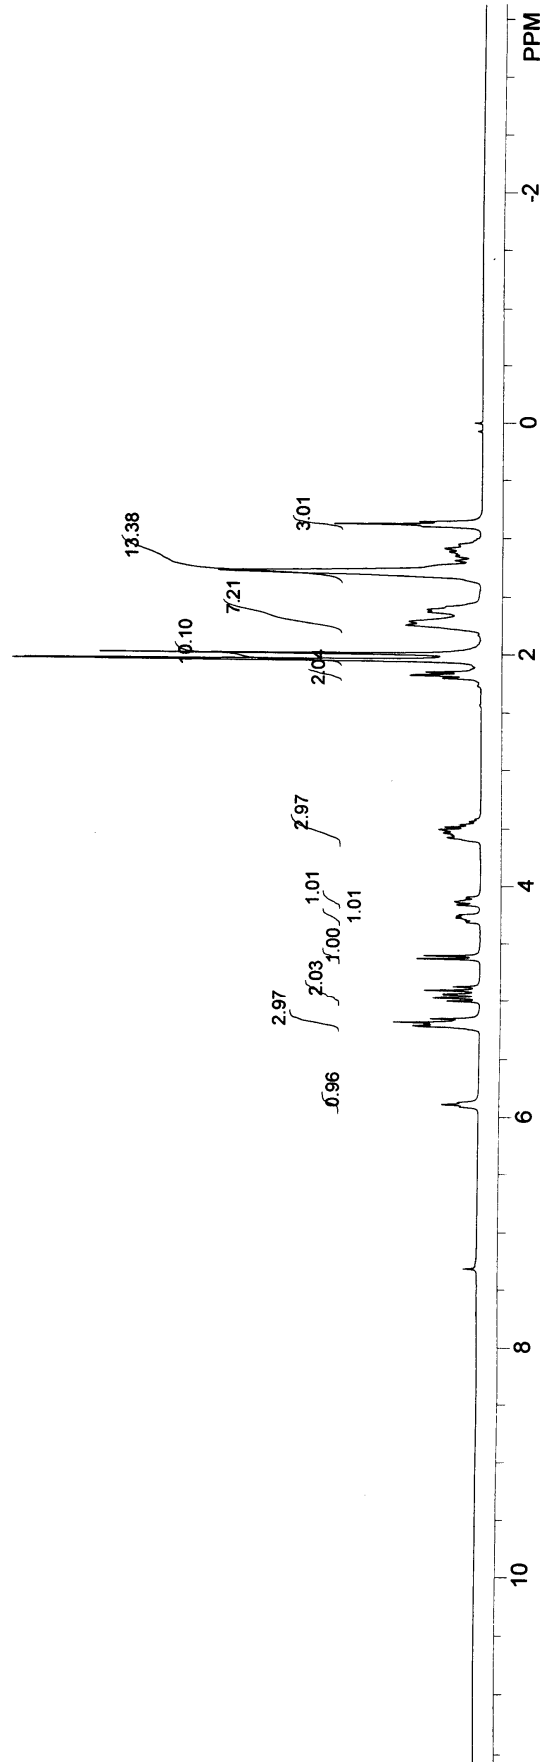



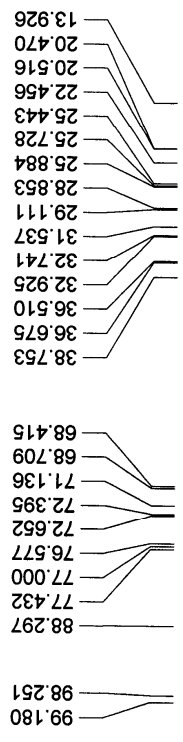

hx-10-56

2014-01-08 10:42:18.671  
 USER: nmr  
 SOLVENT: CDCl3  
 Experiment = zgpg30  
 Pulse length = 9.500 usec  
 Relaxation delay = 2.000 sec  
 NA = 202

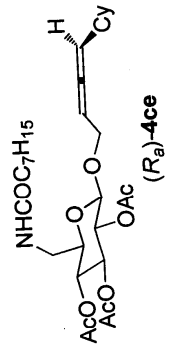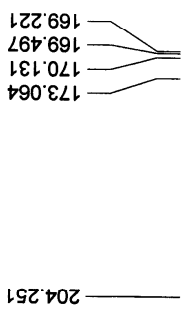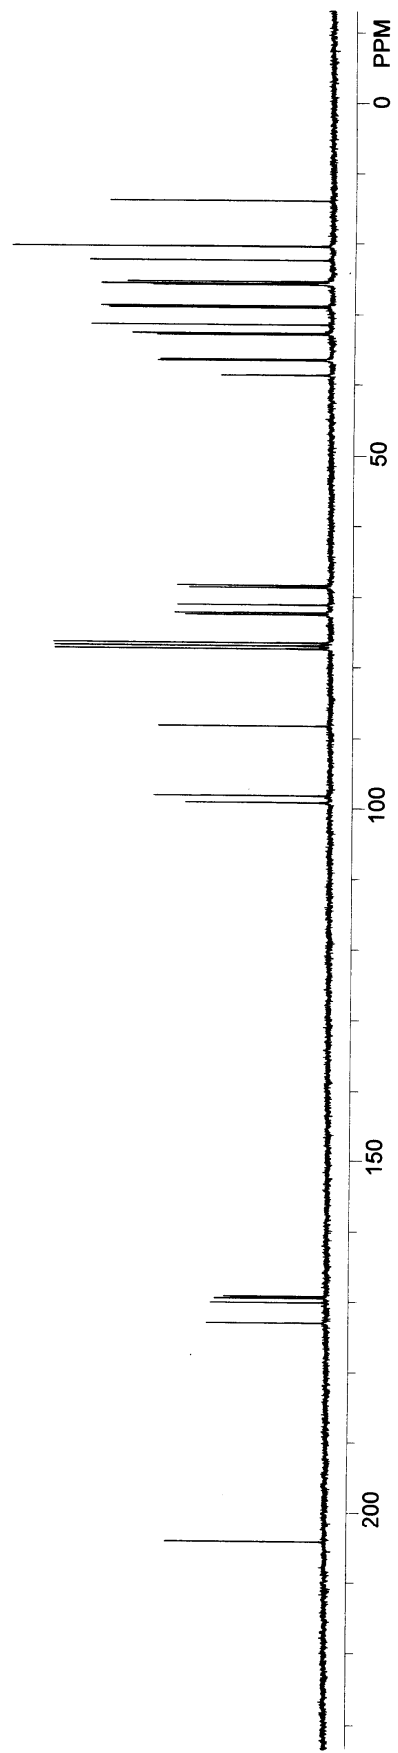

# hx-10-56-ad-h-95-5-1-214

实验时间: 2014-01-09, 10:13:49

报告时间: 2014-01-09, 14:20:32

谱图文件: D:\zhuguangjiong\hx\20140107\hx-10-56-ad-h-95-5-1-214.org

实验内容简介:

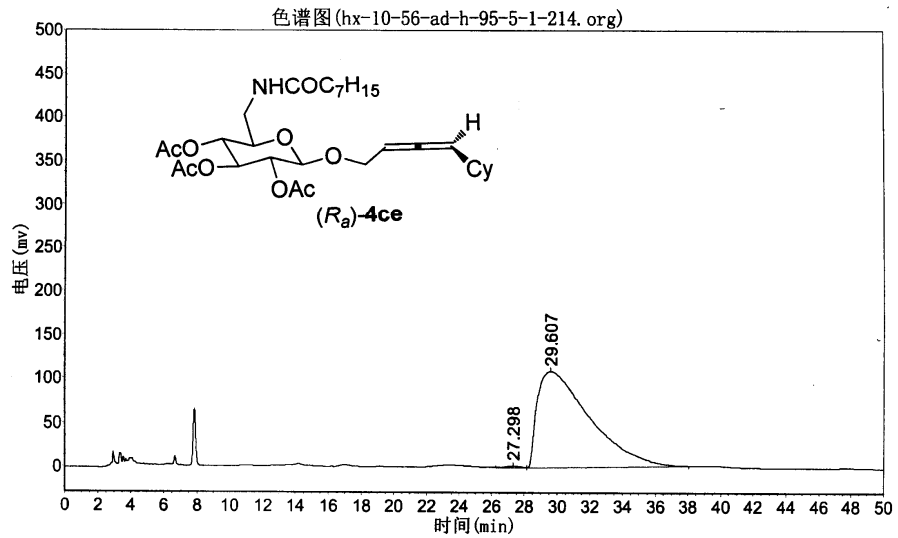

分析结果表

| 峰号 | 峰名 | 保留时间   | 峰高         | 峰面积          | 含量       |
|----|----|--------|------------|--------------|----------|
| 1  |    | 27.298 | 1821.676   | 111795.945   | 0.4631   |
| 2  |    | 29.607 | 107752.578 | 24028170.000 | 99.5369  |
| 总计 |    |        | 109574.254 | 24139965.945 | 100.0000 |

# hx-8-120-ad-h-95-5-1-214

实验时间: 2014-01-09, 11:23:14

报告时间: 2014-01-09, 14:22:20

谱图文件: D:\zhuguangjiong\hx\20140107\hx-8-120-ad-h-95-5-1-214.org

实验内容简介:

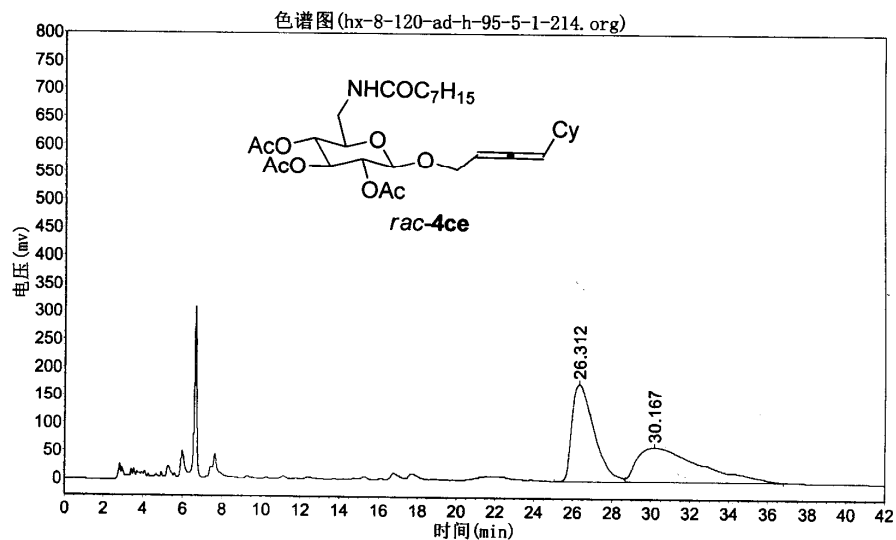

分析结果表

| 峰号 | 峰名 | 保留时间   | 峰高         | 峰面积          | 含量       |
|----|----|--------|------------|--------------|----------|
| 1  |    | 26.312 | 173837.453 | 13615594.000 | 50.1499  |
| 2  |    | 30.167 | 60579.004  | 13534182.000 | 49.8501  |
| 总计 |    |        | 234416.457 | 27149776.000 | 100.0000 |

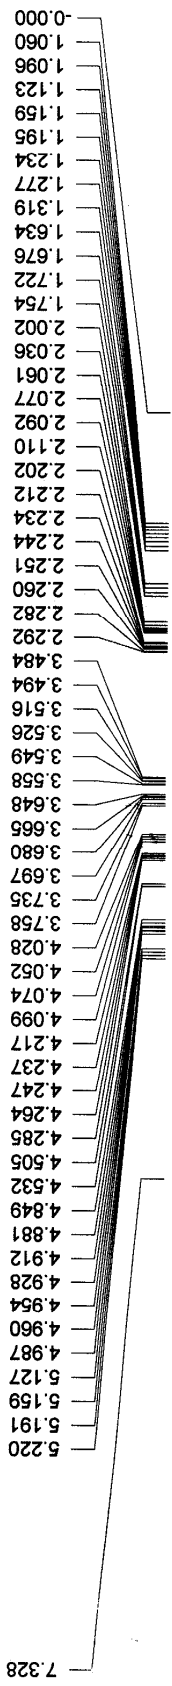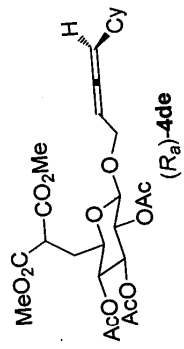

hx-10-76

2014-01-19 14:01:31.718

USER: nmf

SOLVENT: CDCl<sub>3</sub>

Experiment = zg30

Pulse length = 14.000 usec

Relaxation delay = 1.000 sec

NA = 8

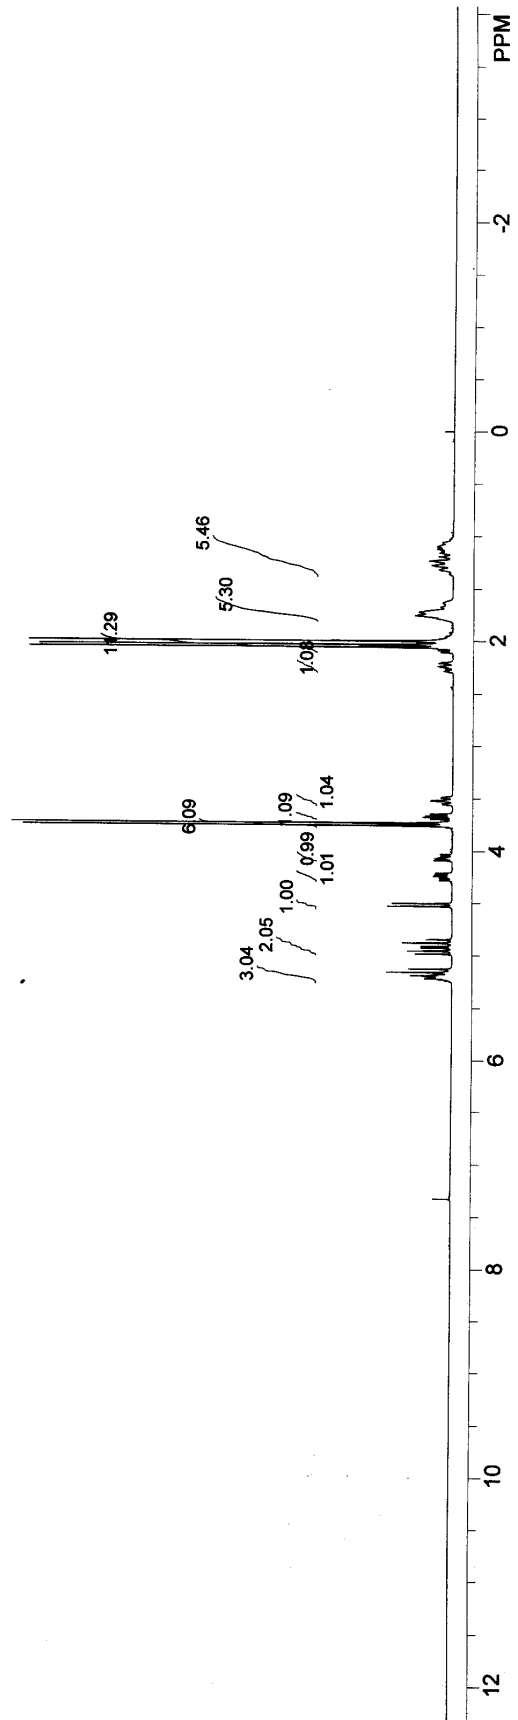

20.443  
 20.489  
 20.516  
 25.728  
 25.875  
 30.204  
 32.659  
 32.816  
 36.620  
 47.430  
 52.541  
 52.577  
 68.093  
 70.952  
 71.136  
 71.623  
 72.625  
 76.577  
 77.000  
 77.423  
 88.343

98.114  
 99.207

169.047  
 169.111  
 169.194  
 169.525  
 170.113

204.123

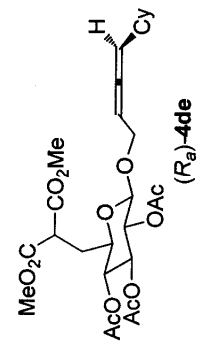

hx-10-76  
 2014-01-19 14:13:38.234  
 USER: nmr  
 SOLVENT: CDCl<sub>3</sub>  
 Experiment = zgpg30  
 Pulse length = 9.500 usec  
 Relaxation delay = 2.000 sec  
 NA = 179

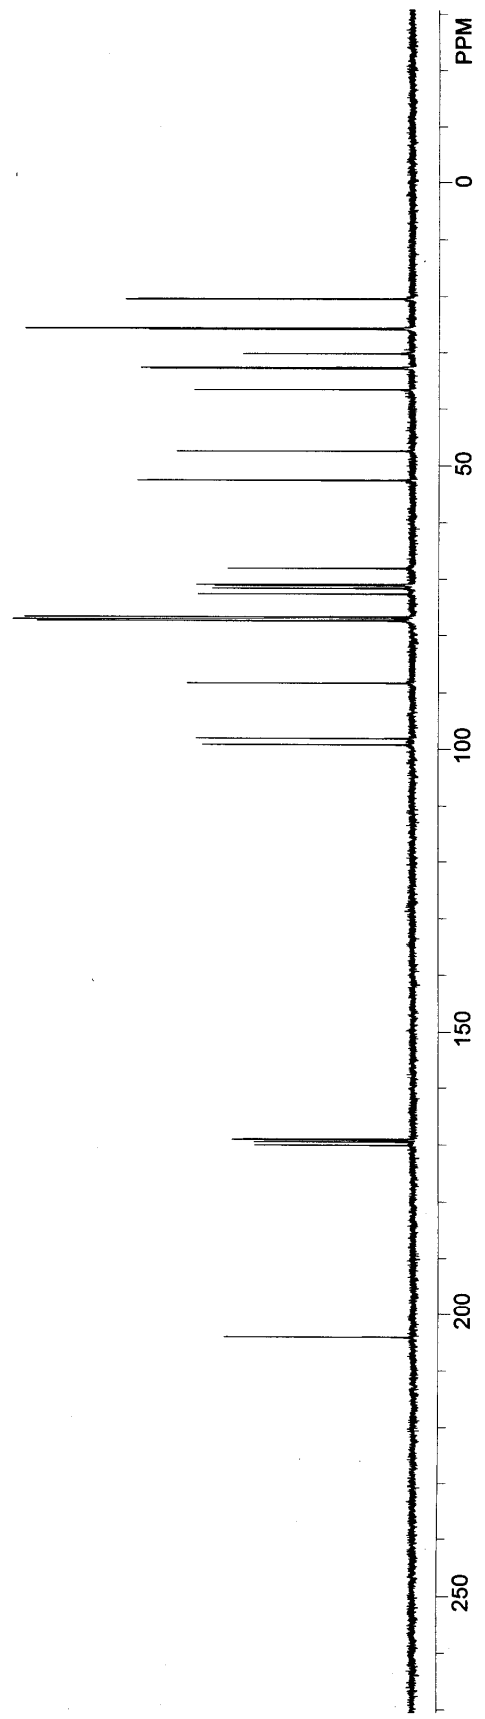

# hx-10-76-ad-h-80-20-0.5-214

实验时间: 2014-01-22, 14:38:14

报告时间: 2014-01-22, 15:43:11

谱图文件: D:\zhuguangji\hx\20140122\hx-10-76-ad-h-80-20-0.5-214.org

实验内容简介:

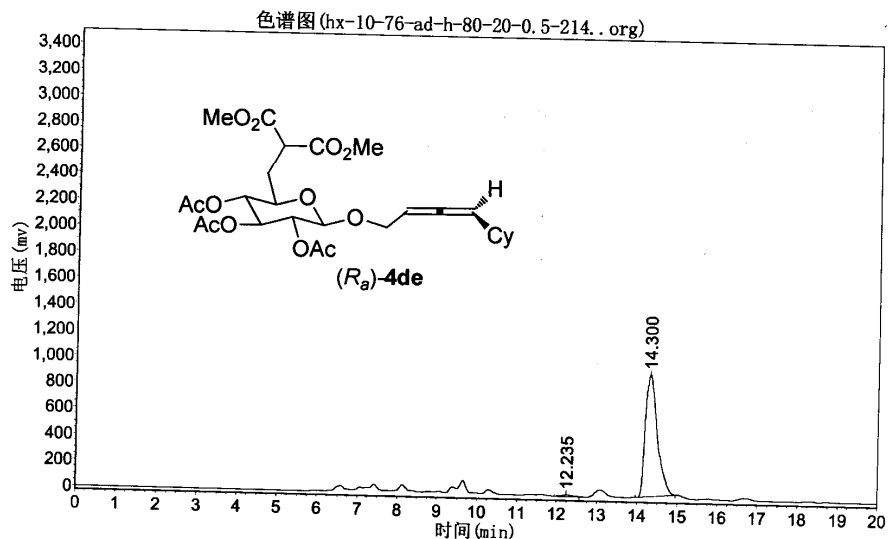

分析结果表

| 峰号 | 峰名 | 保留时间   | 峰高         | 峰面积          | 含量       |
|----|----|--------|------------|--------------|----------|
| 1  |    | 12.235 | 12098.110  | 184974.281   | 0.9560   |
| 2  |    | 14.300 | 931759.688 | 19162808.000 | 99.0440  |
| 总计 |    |        | 943857.798 | 19347782.281 | 100.0000 |

# hx-8-126-ad-h-80-20-0.5-214

实验时间: 2014-01-22, 13:34:04

报告时间: 2014-01-22, 15:40:07

谱图文件: D:\zhuguangjiong\hx\20140122\hx-8-126-ad-h-80-20-0.5-214.org

实验内容简介:

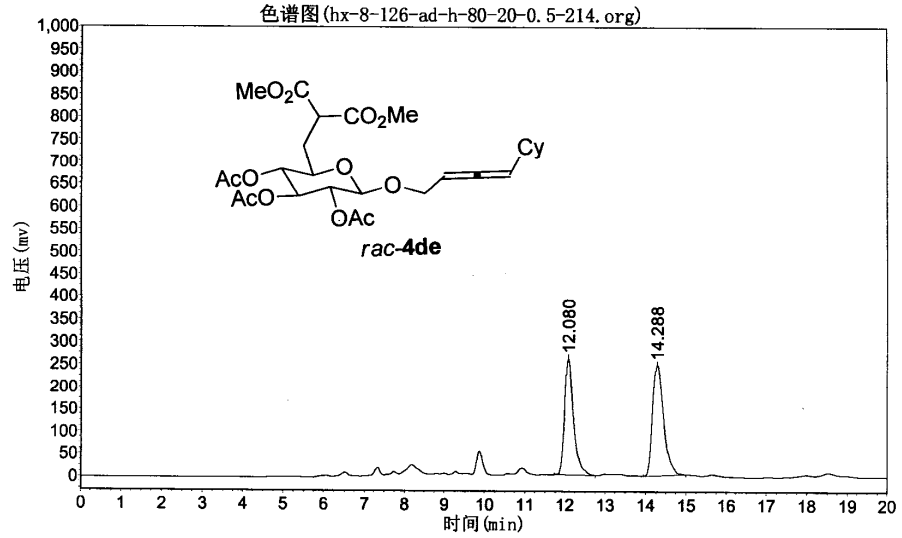

分析结果表

| 峰号 | 峰名 | 保留时间   | 峰高         | 峰面积         | 含量       |
|----|----|--------|------------|-------------|----------|
| 1  |    | 12.080 | 258087.094 | 3988516.750 | 45.8252  |
| 2  |    | 14.288 | 245347.188 | 4715249.000 | 54.1748  |
| 总计 |    |        | 503434.281 | 8703765.750 | 100.0000 |

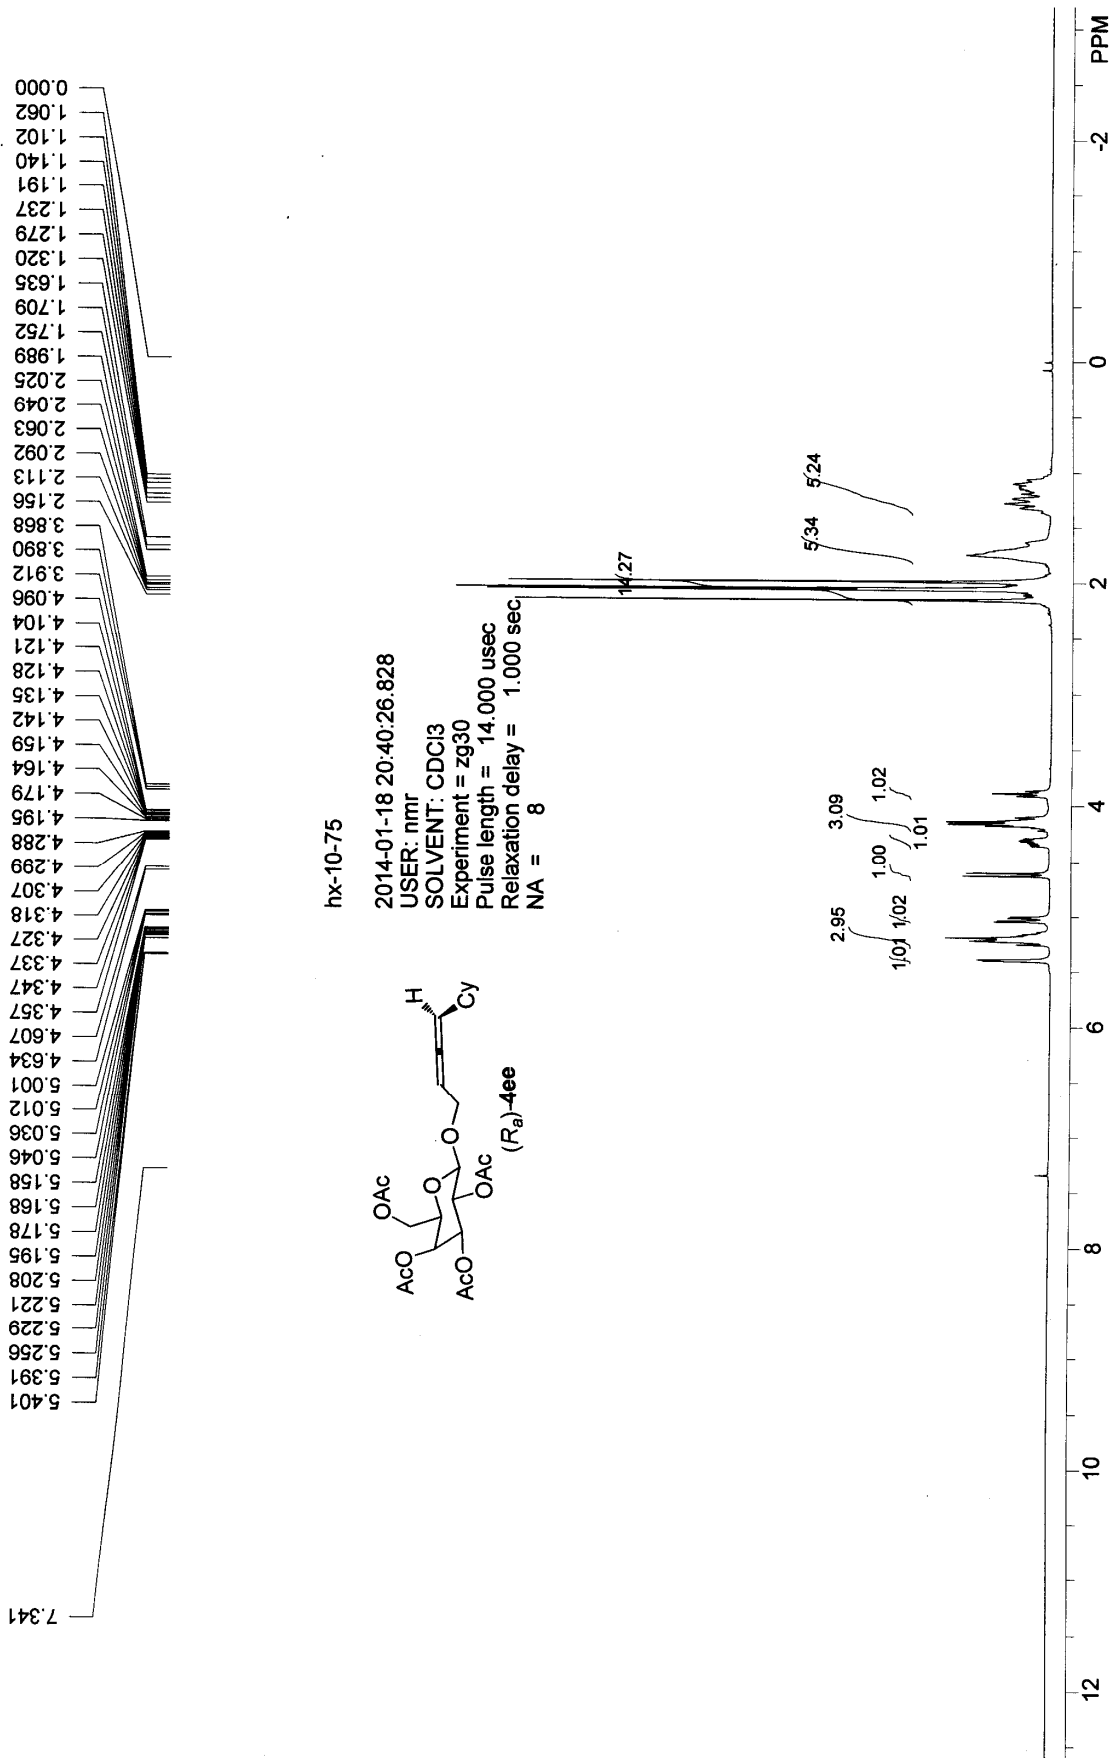

hx-10-75

2014-01-18 20:40:26.828

USER: nmr

SOLVENT: CDCl3

Experiment = zg30

Pulse length = 14.000 usec

Relaxation delay = 1.000 sec

NA = 8

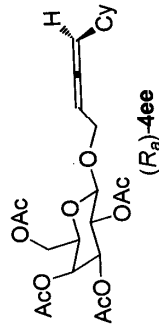



88.159  
77.423  
77.000  
76.577  
70.786  
70.419  
68.562  
67.808  
66.825  
61.071  
36.593  
32.815  
32.649  
25.829  
25.664  
20.535  
20.434  
20.360

99.152  
97.957

170.122  
170.085  
169.975  
169.185

204.288

hx-10-75

2014-01-18 20:56:47.578

USER: nmr

SOLVENT: CDCl3

Experiment = zgpg30

Pulse length = 9.500 usec

Relaxation delay = 2.000 sec

NA = 253

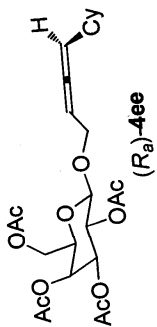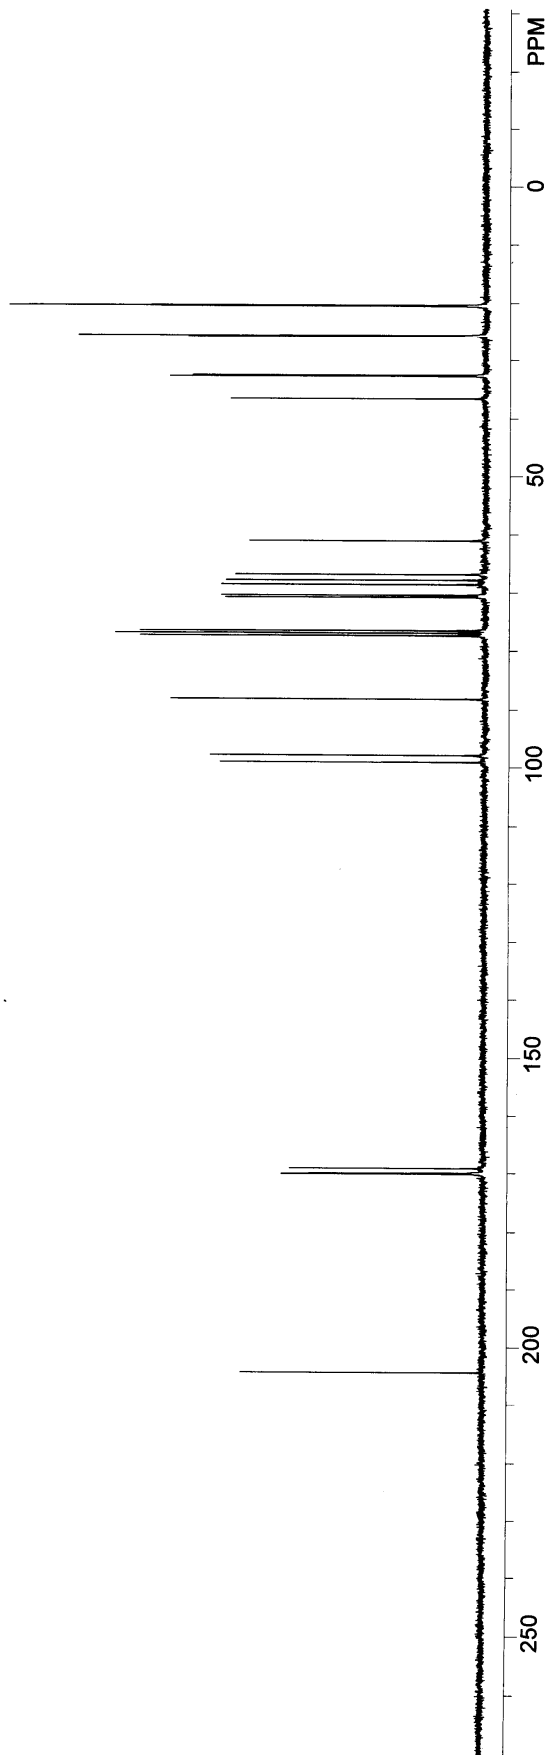

中国科学院上海有机化学研究所

Project Name: defaults for copy

Reported by User: Breeze user (Breeze)

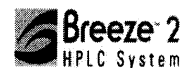

### SAMPLE INFORMATION

|                   |                          |                  |                        |
|-------------------|--------------------------|------------------|------------------------|
| Sample Name:      | hx-10-75-ad-h-95-5-1-214 | Acquired By:     | Breeze                 |
| Sample Type:      | 未知                       | Date Acquired:   | 2014/1/23 15:00:00 CST |
| Vial:             | 1                        | Acq. Method:     | zg95                   |
| Injection #:      | 34                       | Date Processed:  | 2014/1/23 16:40:29 CST |
| Injection Volume: | 10.00 $\mu$ l            | Channel Name:    | W2489 CHA              |
| Run Time:         | 300.00 Minutes           | Sample Set Name: |                        |

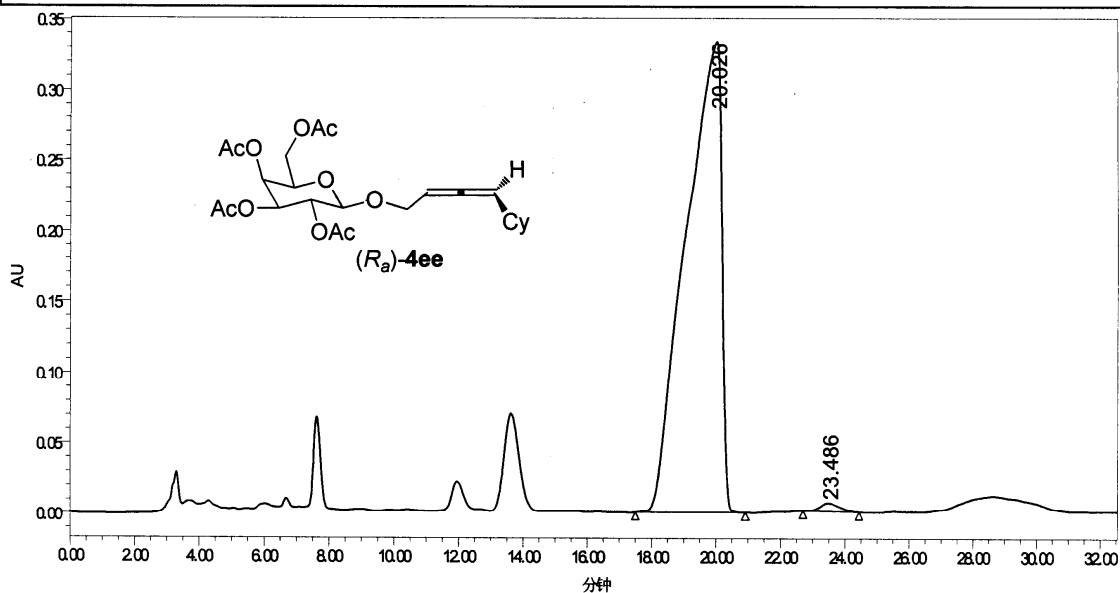

|   | RT (min) | Area (峰sec) | %Area | Height (峰) | % Height |
|---|----------|-------------|-------|------------|----------|
| 1 | 20.026   | 25600366    | 99.00 | 333042     | 98.19    |
| 2 | 23.486   | 258500      | 1.00  | 6136       | 1.81     |

Report Method: 无标题

Page: 1 (共计 1)

Printed: 2014/1/23

17:17:30 FRC

**SAMPLE INFORMATION**

|                   |                         |                  |                        |
|-------------------|-------------------------|------------------|------------------------|
| Sample Name:      | hx-10-83-adh-95-5-1-214 | Acquired By:     | Breeze                 |
| Sample Type:      | 未知                      | Date Acquired:   | 2014/1/23 16:09:02 CST |
| Vial:             | 1                       | Acq. Method:     | zgj95                  |
| Injection#:       | 36                      | Date Processed:  | 2014/1/23 16:39:51 CST |
| Injection Volume: | 10.00 u                 | Channel Name:    | V2489 C-A              |
| Run Time:         | 300.00 Minutes          | Sample Set Name: |                        |

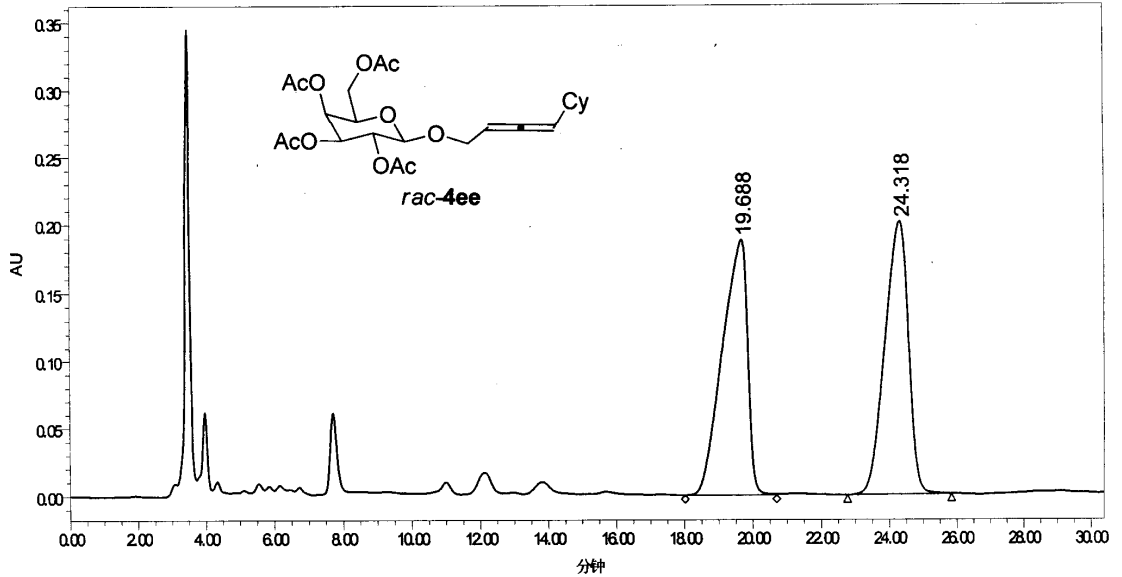

|   | RT (min) | Area (峰sec) | %Area | Hight (峰) | % Hight |
|---|----------|-------------|-------|-----------|---------|
| 1 | 19.688   | 9693001     | 50.11 | 188182    | 48.34   |
| 2 | 24.318   | 964875E     | 49.89 | 20110E    | 51.66   |

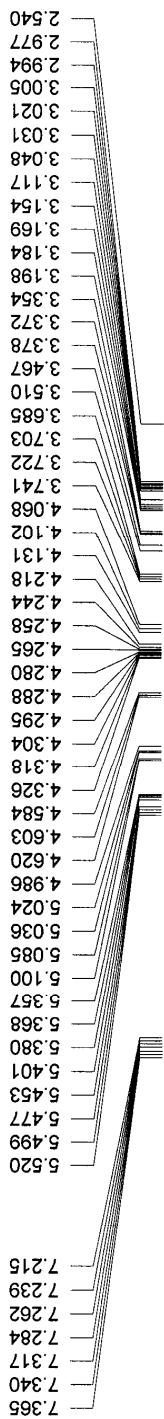

hx-12-190-DMSO

2015-02-06 22:44:00.578

USER: nmr

SOLVENT: DMSO

Experiment = z930

Pulse length = 14.000 usec

Relaxation delay = 1.000 sec

NA = 13

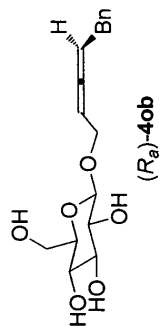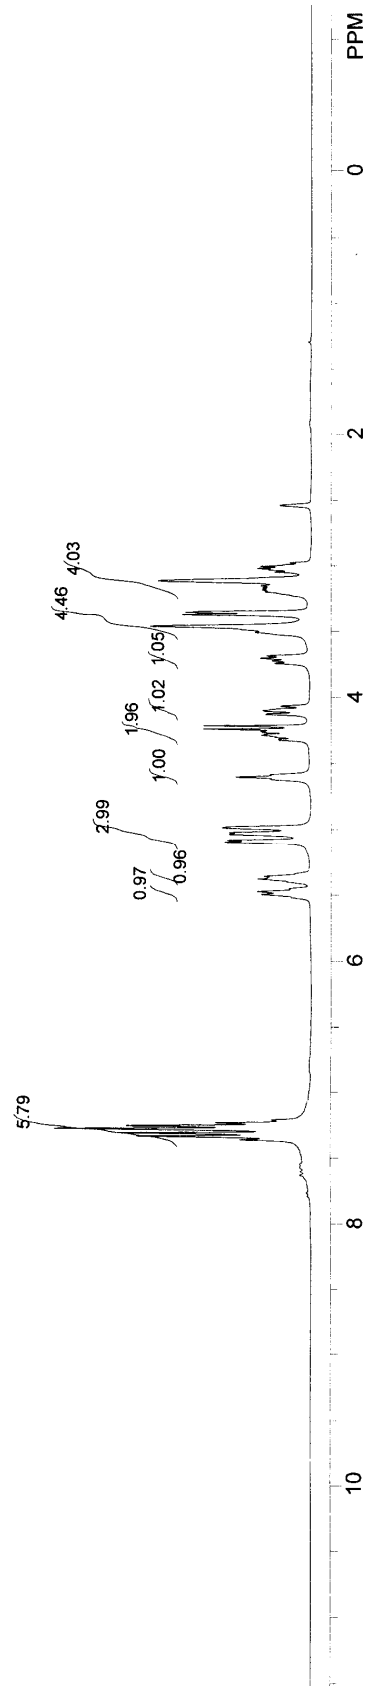

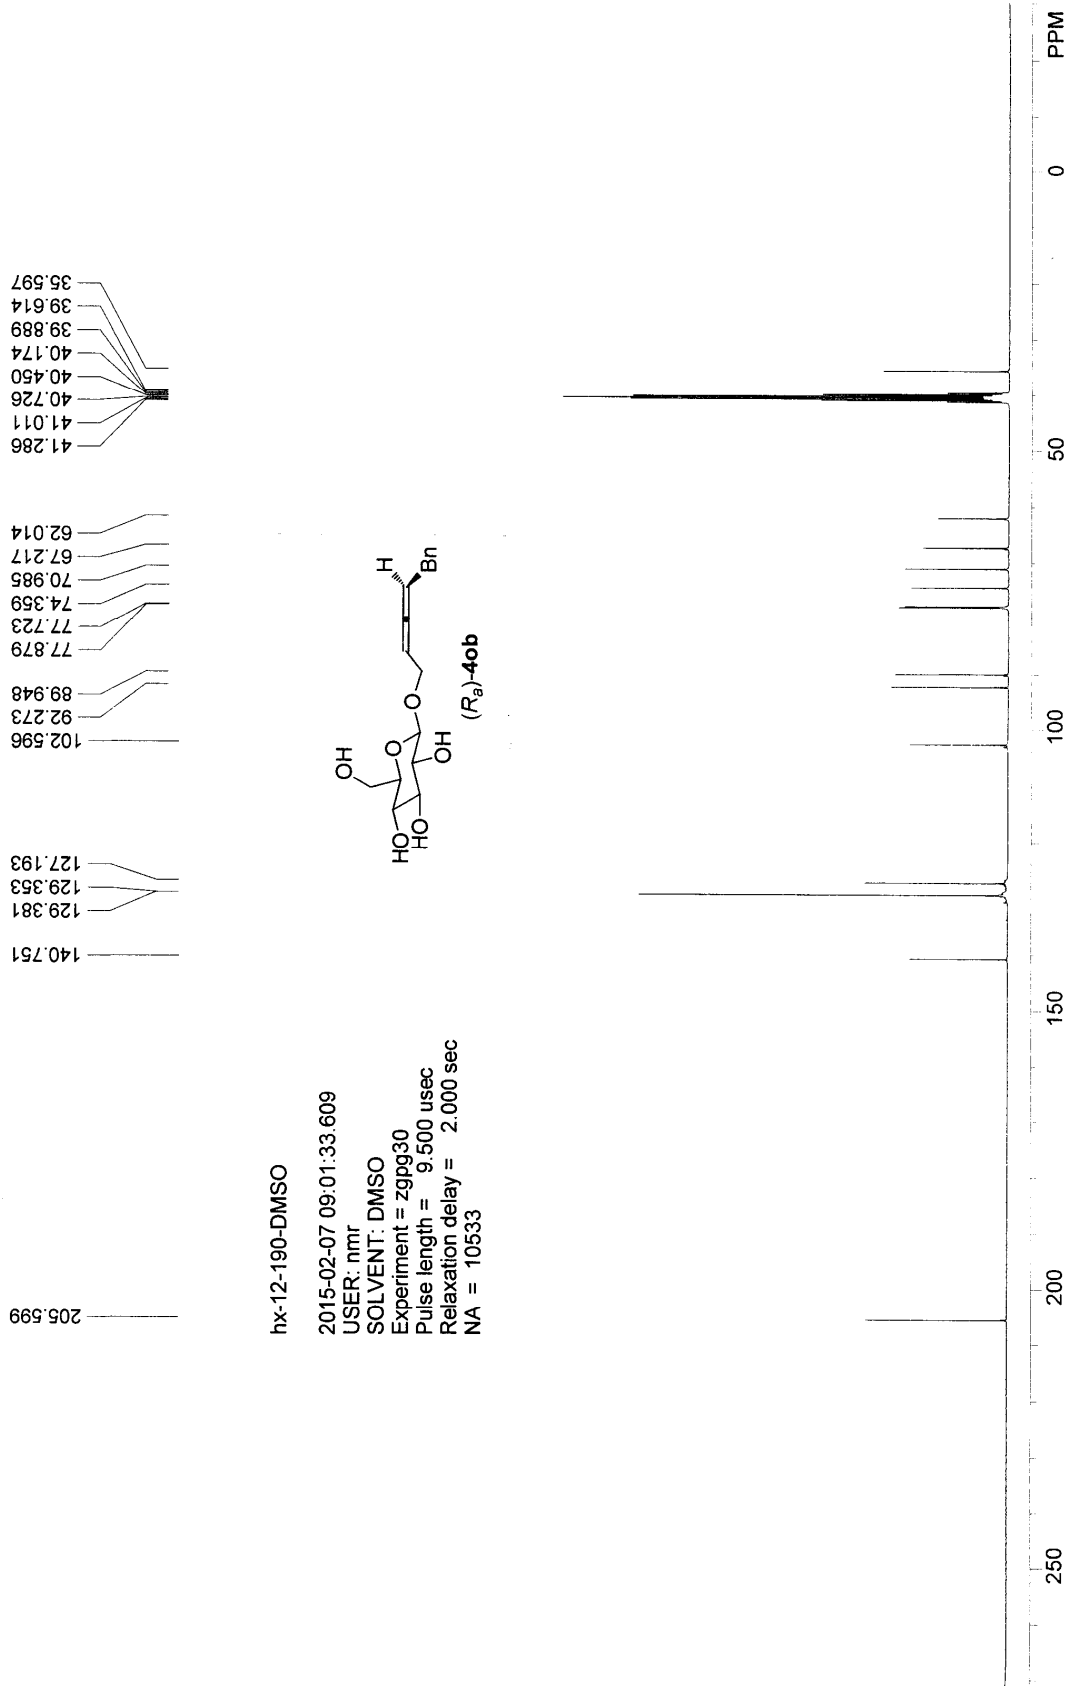

hx-12-190-DMSO

2015-02-07 09:01:33.609  
 USER: nmr  
 SOLVENT: DMSO  
 Experiment = zgpg30  
 Pulse length = 9.500 usec  
 Relaxation delay = 2.000 sec  
 NA = 10533

中国科学院上海有机化学研究所

Project Name: defaults for copy

Reported by User: Breeze user (Breeze)

Breeze 2  
HPLC System

### SAMPLE INFORMATION

|                   |                         |                  |                      |
|-------------------|-------------------------|------------------|----------------------|
| Sample Name:      | hx-12-190-q-80-20-1-214 | Acquired By:     | Breeze               |
| Sample Type:      | 未知                      | Date Acquired:   | 2015/29 18:18:30 CST |
| Vial:             | 1                       | Acq. Method:     | zg80                 |
| Injection #:      | 11                      | Date Processed:  | 2015/29 19:34:59 CST |
| Injection Volume: | 25.00 $\mu$ l           | Channel Name:    | V2489 ChA            |
| Run Time:         | 30.00 Minutes           | Channel Desc.:   | V2489 ChA 214mm      |
| Column Type:      |                         | Sample Set Name: |                      |

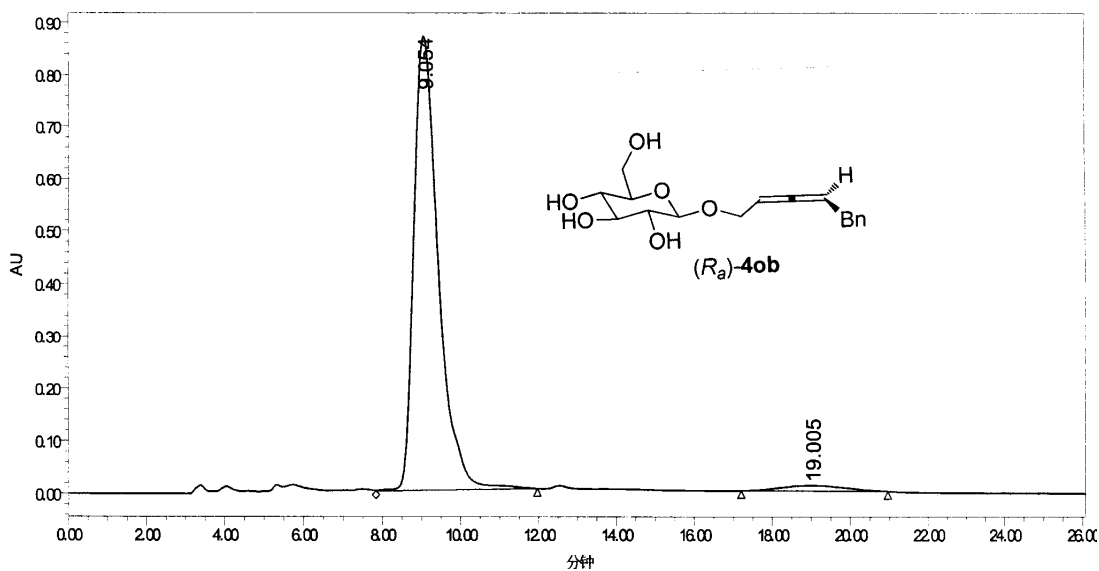

|   | RT<br>(min) | Area<br>(峰面积) | %Area | Height<br>(峰高) | %<br>Height |
|---|-------------|---------------|-------|----------------|-------------|
| 1 | 9.054       | 3775327       | 96.93 | 867868         | 98.78       |
| 2 | 19.005      | 119652        | 3.07  | 10688          | 1.21        |

Report Method: Individual Report.ASC

Page: 1 (共计 1)

Printed: 2015/2/10

10:18:03.FFC

中国科学院上海有机化学研究所

Project Name: defaults for copy

Reported by User: Breeze user (Breeze)

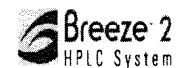

### SAMPLE INFORMATION

|                   |                          |                  |                       |
|-------------------|--------------------------|------------------|-----------------------|
| Sample Name:      | hx-12-200-gj-80-20-1-214 | Acquired By:     | Breeze                |
| Sample Type:      | 未知                       | Date Acquired:   | 2015/2/9 17:49:47 CST |
| Vial:             | 1                        | Acq. Method:     | zgj80                 |
| Injection #:      | 10                       | Date Processed:  | 2015/2/9 18:18:10 CST |
| Injection Volume: | 25.00 uL                 | Channel Name:    | V2489 G-A             |
| Run Time:         | 200.00 Minutes           | Channel Desc.:   | V2489 G-A.214nm       |
| Column Type:      |                          | Sample Set Name: |                       |

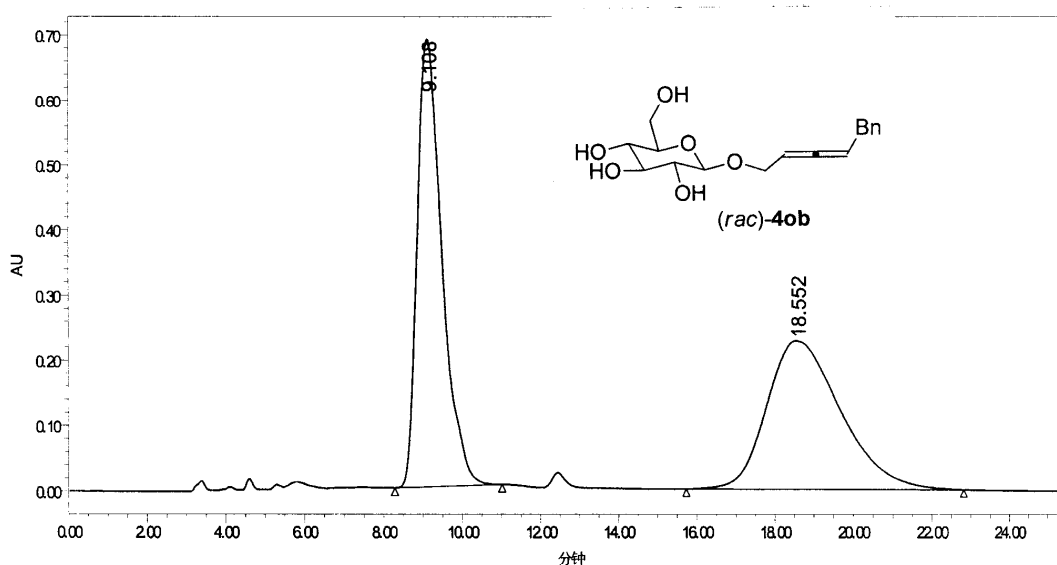

|   | RT<br>(min) | Area<br>(峰面积) | %Area | Height<br>(峰高) | %<br>Height |
|---|-------------|---------------|-------|----------------|-------------|
| 1 | 9.102       | 30007091      | 50.31 | 686946         | 75.25       |
| 2 | 18.552      | 29643113      | 49.69 | 225891         | 24.75       |

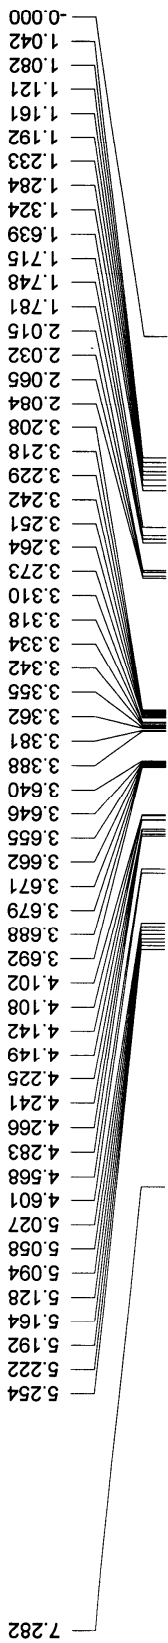

hx-10-55

2014-01-07 10:50:34.515

USER: nmr

SOLVENT: CDC13

Experiment = zg30

Pulse length = 14.000 usec

Relaxation delay = 1.000 sec

NA = 8

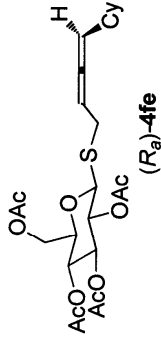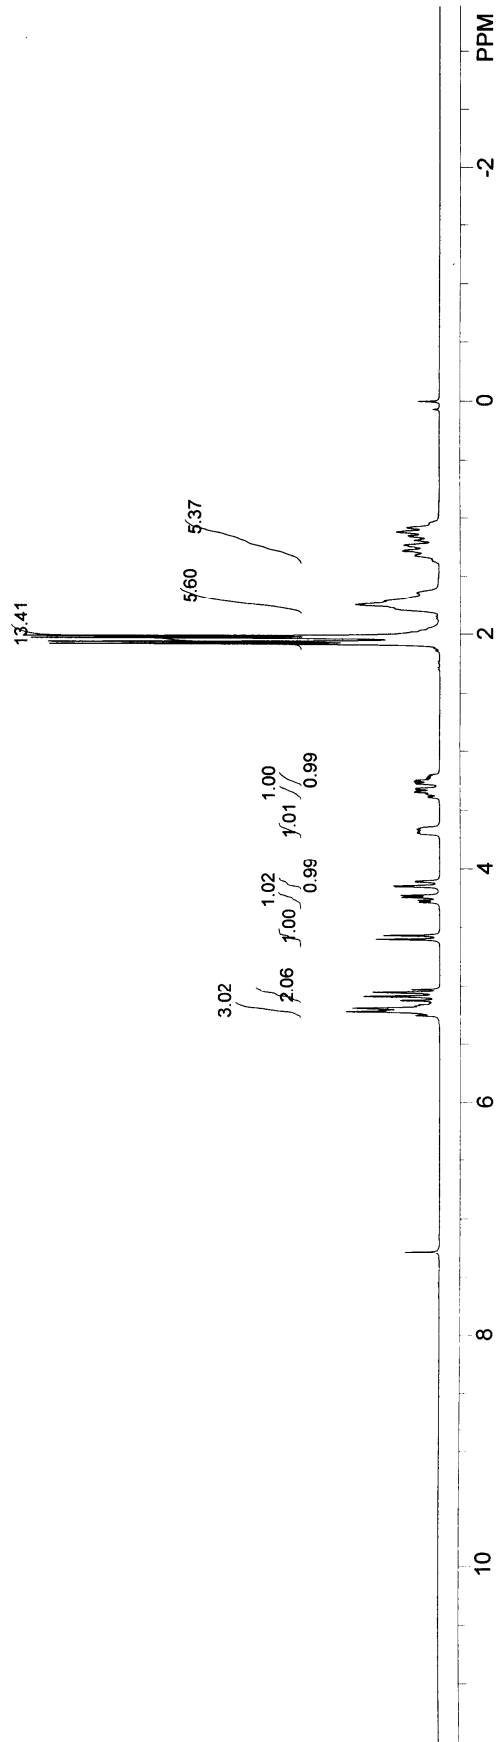



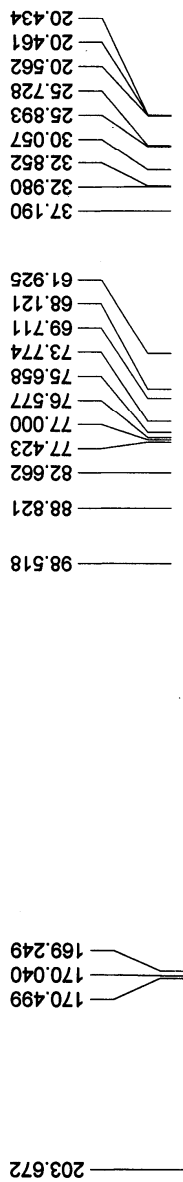

hx-10-55

2014-01-08 11:22:19.546

USER: nmr

SOLVENT: CDCl3

Experiment = zgpg30

Pulse length = 9.500 usec

Relaxation delay = 2.000 sec

NA = 563

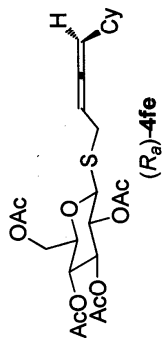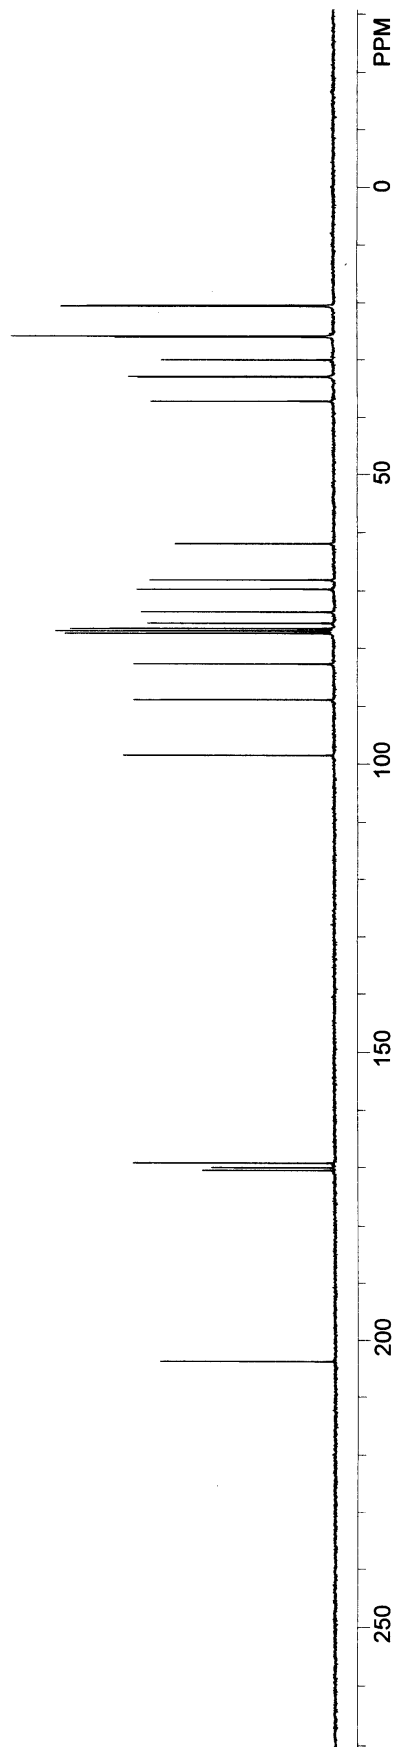

# hx-10-55-as-h-95-5-0.5-214

实验时间: 2014-01-09, 16:51:33

报告时间: 2014-01-10, 12:01:37

谱图文件: D:\zhuguangji\hx\20140107\hx-10-55-as-h-95-5-0.5-214.org

实验内容简介:

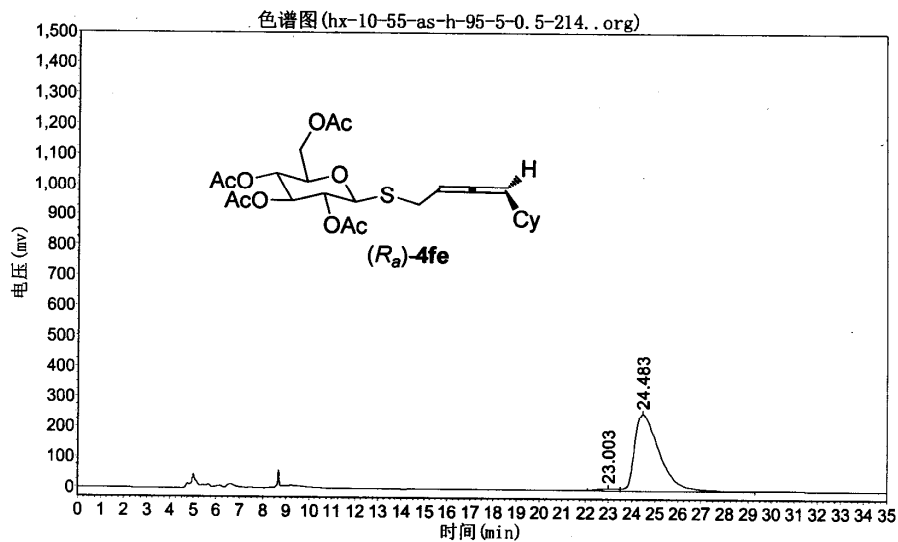

分析结果表

| 峰号 | 峰名 | 保留时间   | 峰高         | 峰面积          | 含量       |
|----|----|--------|------------|--------------|----------|
| 1  |    | 23.003 | 6496.188   | 385279.594   | 1.9777   |
| 2  |    | 24.483 | 253253.203 | 19095954.000 | 98.0223  |
| 总计 |    |        | 259749.391 | 19481233.594 | 100.0000 |

# hx-8-97-as-h-95-5-0.5-214

实验时间: 2014-01-09, 15:47:28

报告时间: 2014-01-10, 12:02:41

谱图文件: D:\zhuguangji\hx\20140107\hx-8-97-as-h-95-5-0.5-

214.org

实验内容简介:

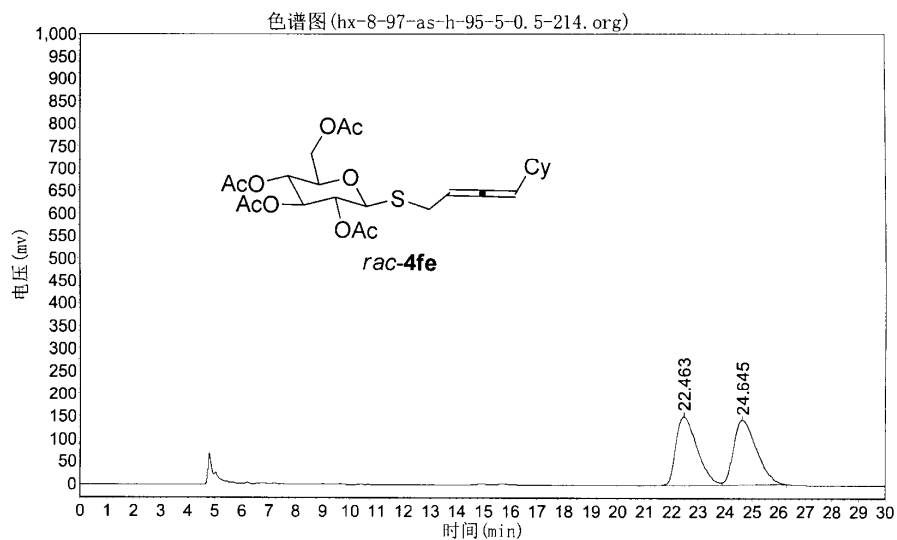

分析结果表

| 峰号 | 峰名 | 保留时间   | 峰高         | 峰面积          | 含量       |
|----|----|--------|------------|--------------|----------|
| 1  |    | 22.463 | 150183.109 | 8207924.500  | 49.4230  |
| 2  |    | 24.645 | 140891.609 | 8399574.000  | 50.5770  |
| 总计 |    |        | 291074.719 | 16607498.500 | 100.0000 |

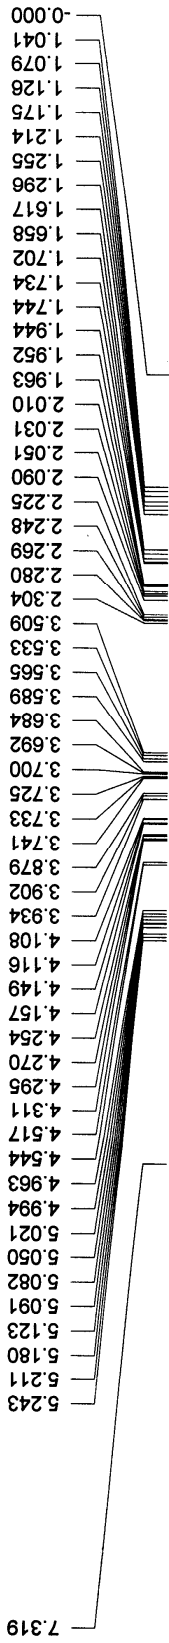

hx-10-77

2014-01-20 09:54:19.093

USER: nmr

SOLVENT: CDCl3

Experiment = zg30

Pulse length = 14.000 usec

Relaxation delay = 1.000 sec

NA = 8

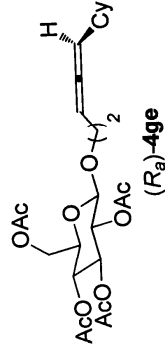

*C. B. 1/2 2/20/17*

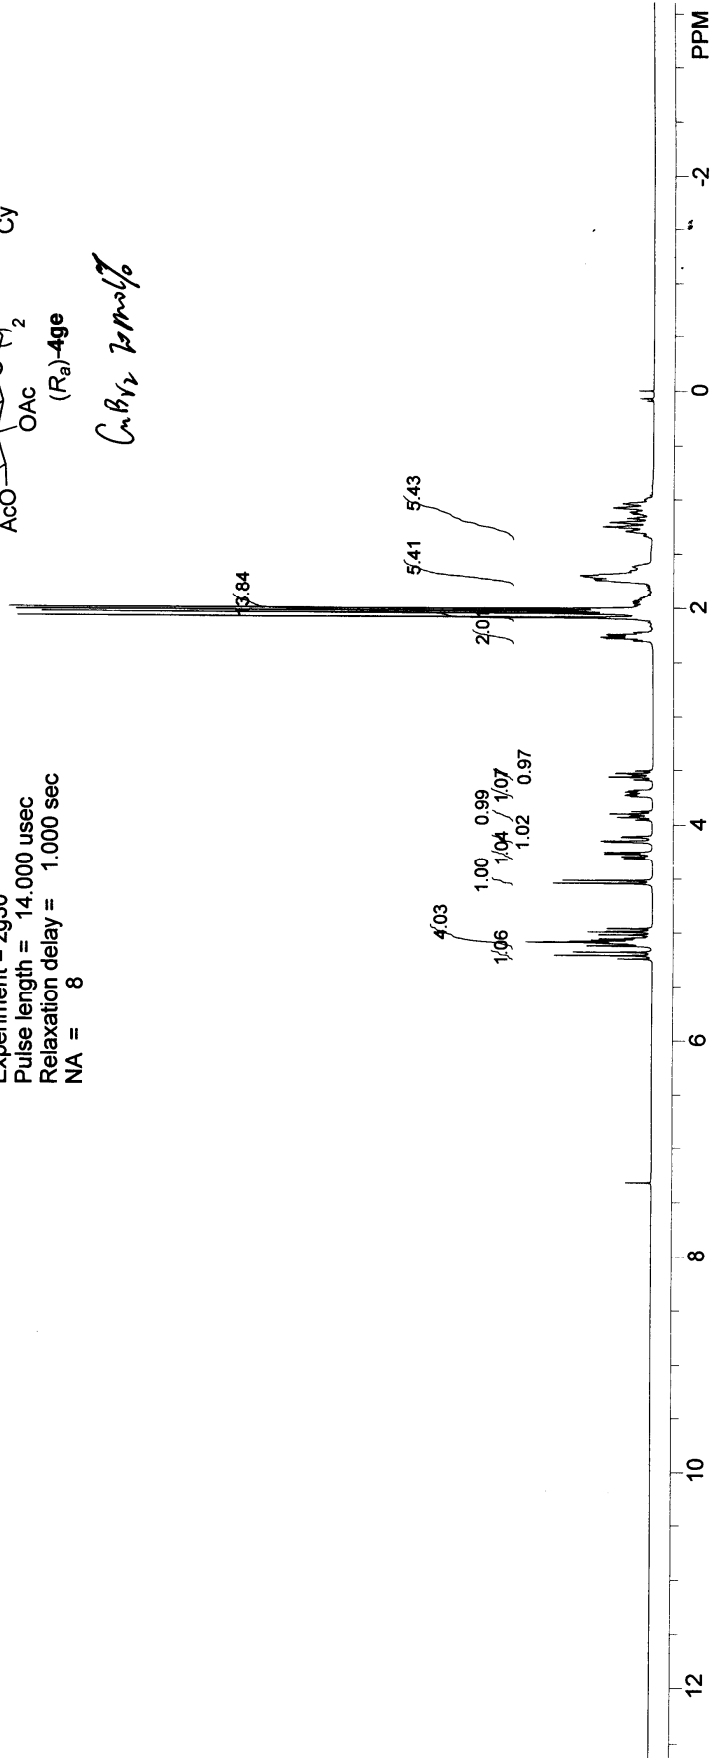

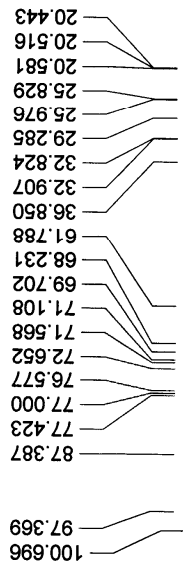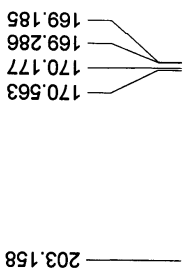

hx-10-77

2014-01-20 10:05:37.546

USER: nmr

SOLVENT: CDCl3

Experiment = zgpg30

Pulse length = 9.500 usec

Relaxation delay = 2.000 sec

NA = 170

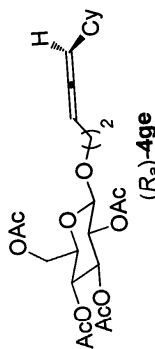

*Cyber 70 moly*

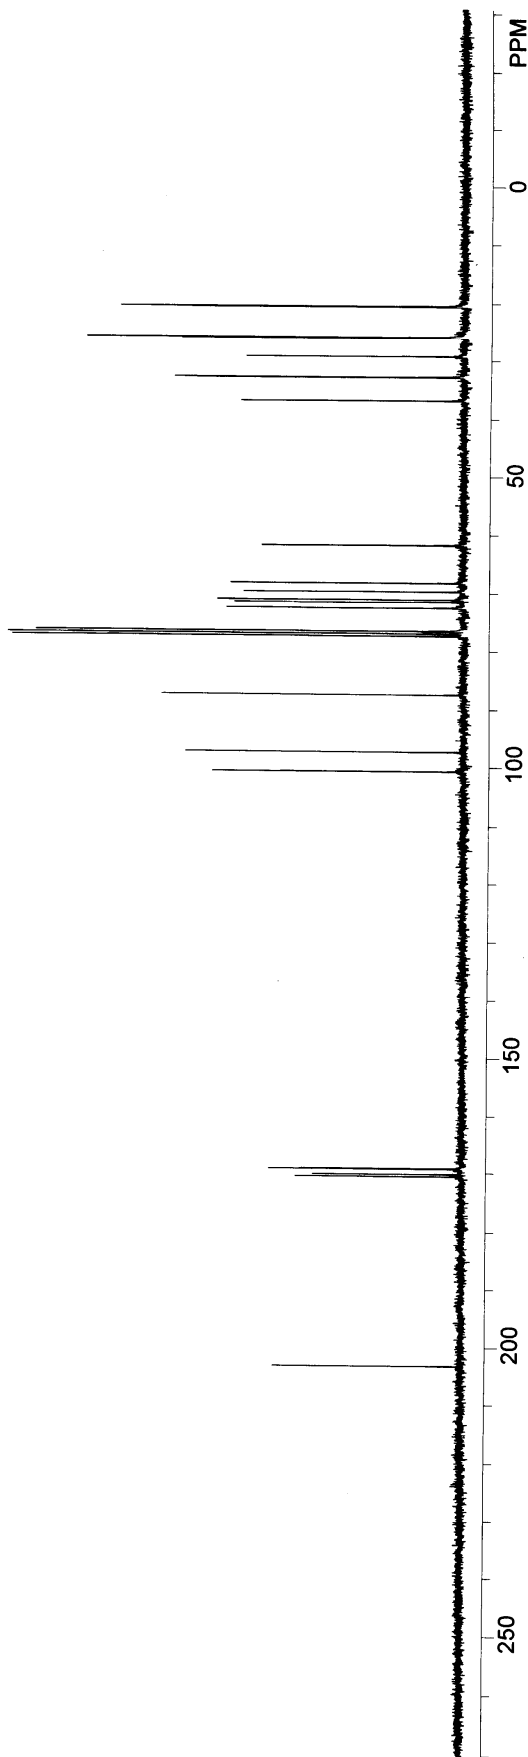

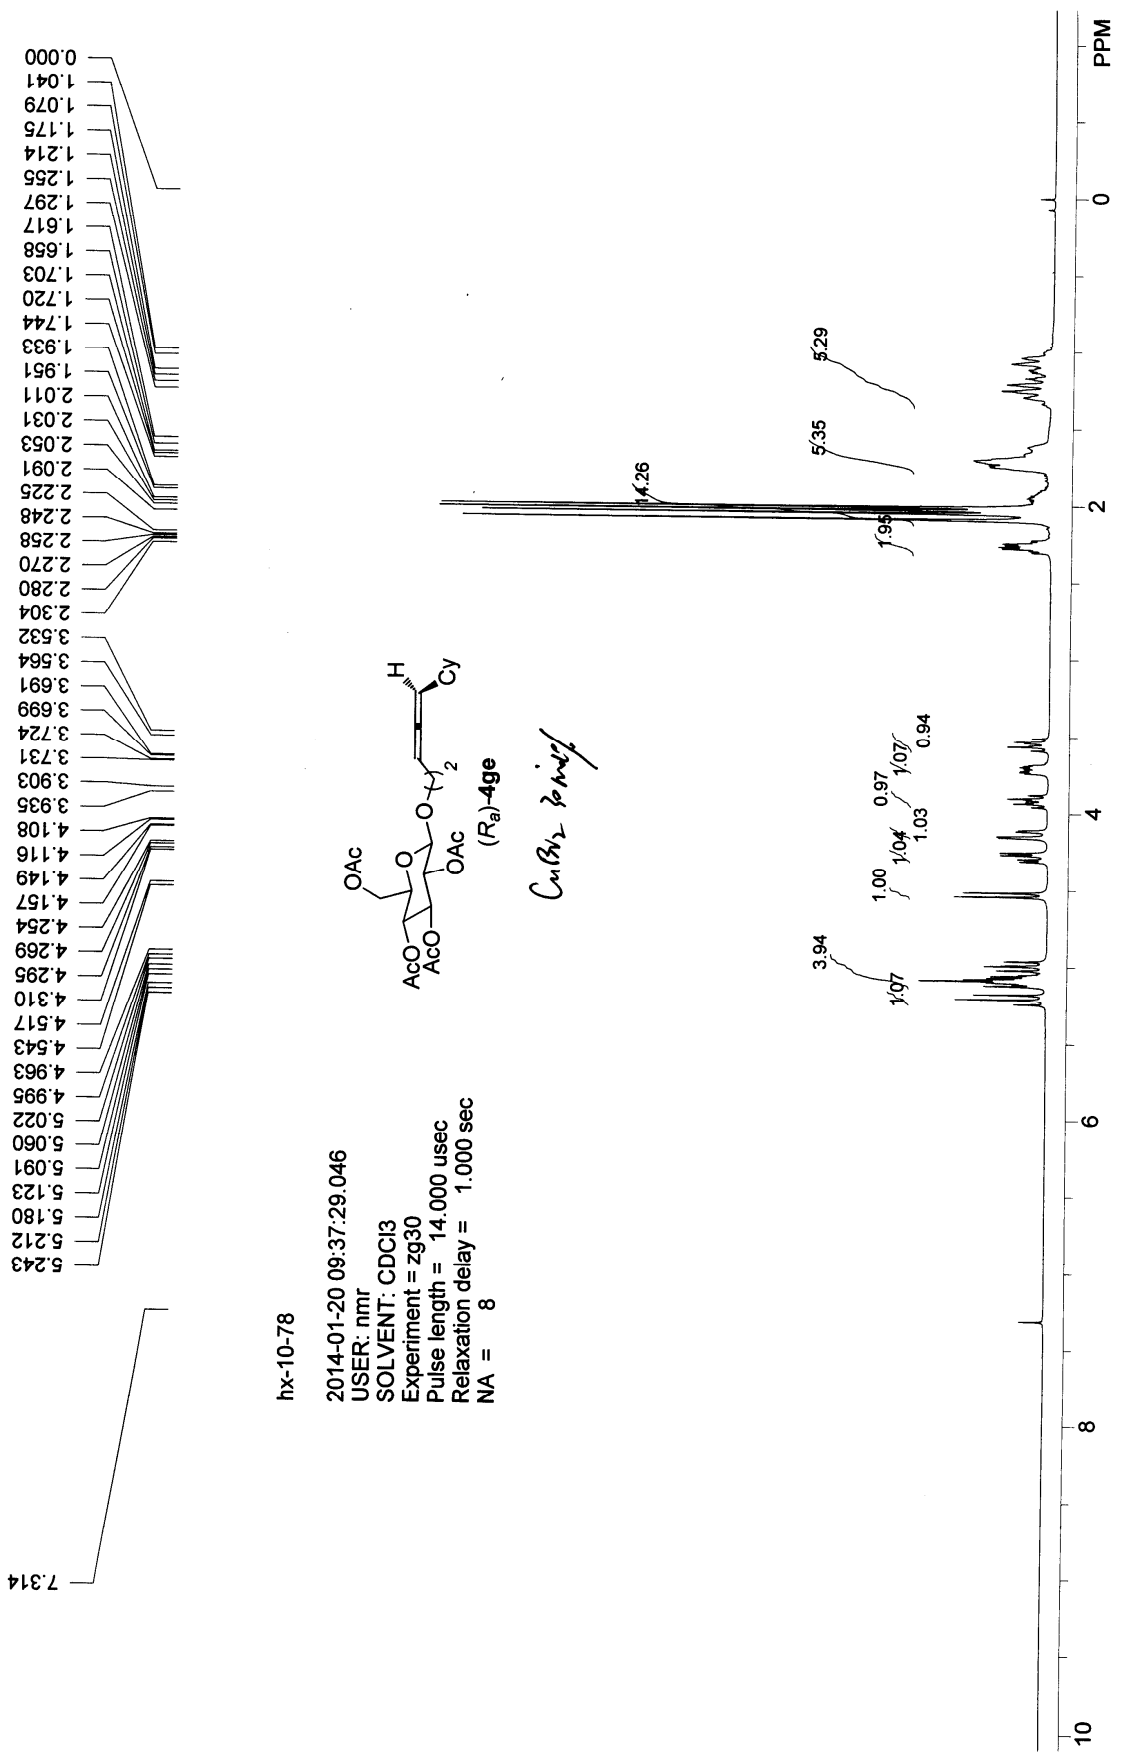

hx-10-78

2014-01-20 09:37:29.046  
 USER: nmr  
 SOLVENT: CDCl3  
 Experiment = zg30  
 Pulse length = 14.000 usec  
 Relaxation delay = 1.000 sec  
 NA = 8

数据文件 D:\CHEM32\1\DATA\HX\HX000096.D  
 样品名: hx-10-77

IC, n-hexane/i-PrOH =96/4, 0.4ml/min; 214nm

```

=====
进样日期       : 2004-1-1 11:34:19
样品名称       : hx-10-77
操作者        : hx
仪器           : 仪器 1
采集方法       : D:\CHEM32\1\METHODS\ZYY_LC.M
最后修改      : 2004-1-1 9:45:34 : hx
                (调用后修改)
分析方法       : D:\CHEM32\1\METHODS\ZYY_LC.M
最后修改      : 2004-1-1 14:42:48 : hx
                (调用后修改)
=====
  
```

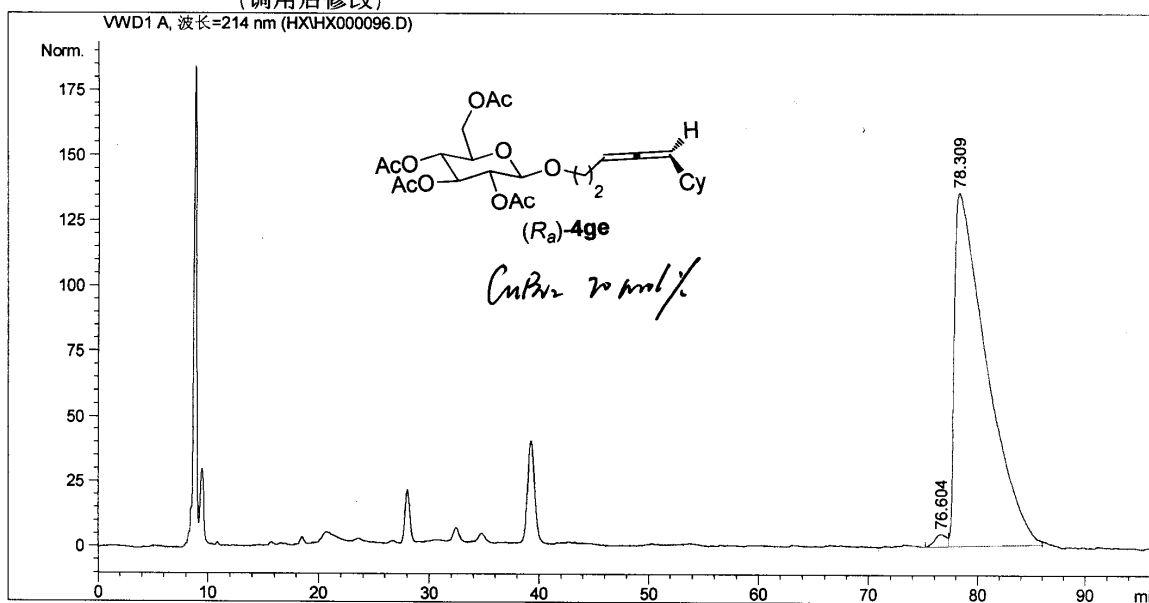

=====  
 面积百分比报告  
 =====

```

排序           : 信号
乘积因子       : 1.0000
稀释因子       : 1.0000
内标使用乘积因子和稀释因子
  
```

信号 1: VWD1 A, 波长=214 nm

| 峰 # | 保留时间 [min] | 类型 | 峰宽 [min] | 峰面积 mAU *s | 峰高 [mAU]  | 峰面积 %   |
|-----|------------|----|----------|------------|-----------|---------|
| 1   | 76.604     | BV | 0.9009   | 346.61212  | 4.79888   | 1.2314  |
| 2   | 78.309     | VB | 2.6037   | 2.78005e4  | 135.47583 | 98.7686 |

总量 : 2.81471e4 140.27471

=====  
 \*\*\* 报告结束 \*\*\*

数据文件 D:\CHEM32\1\DATA\HX\HX000095.D  
 样品名: hx-10-78

IC, n-hexane/i-PrOH =96/4, 0.4ml/min; 214nm

进样日期 : 2004-1-1 9:46:49  
 样品名称 : hx-10-78  
 操作者 : hx  
 仪器 : 仪器 1  
 方法 : D:\CHEM32\1\METHODS\ZYY\_LC.M  
 最后修改 : 2004-1-1 9:45:34 : hx  
 (调用后修改)

位置 : -

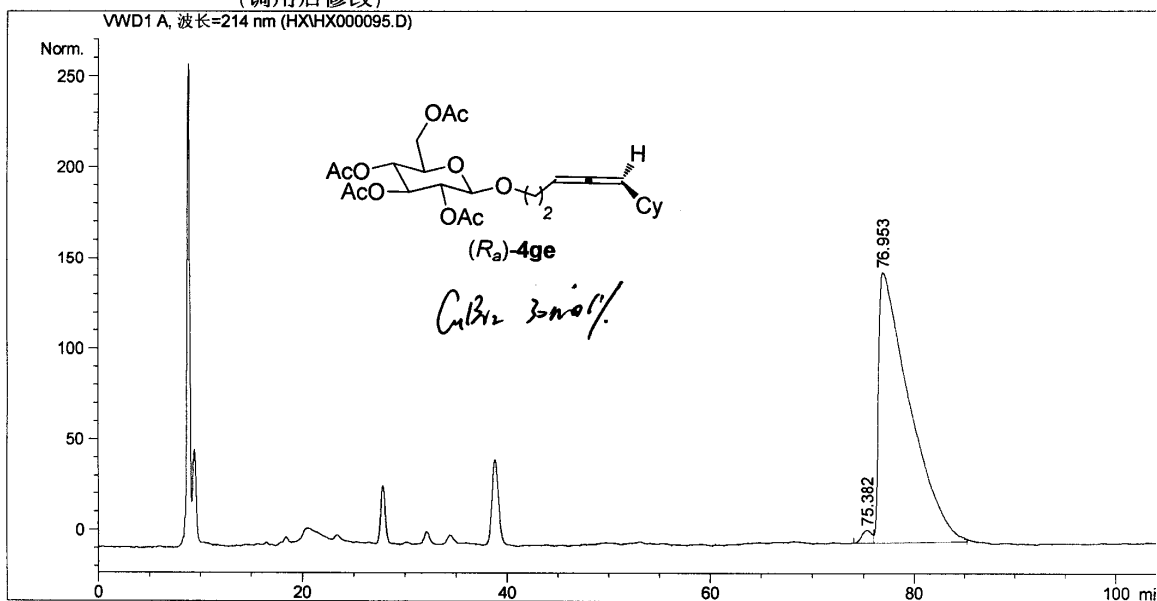

面积百分比报告

排序 : 信号  
 乘积因子 : 1.0000  
 稀释因子 : 1.0000  
 内标使用乘积因子和稀释因子

信号 1: VWD1 A, 波长=214 nm

| 峰 # | 保留时间 [min] | 类型 | 峰宽 [min] | 峰面积 mAU * s | 峰高 [mAU]  | 峰面积 %   |
|-----|------------|----|----------|-------------|-----------|---------|
| 1   | 75.382     | BV | 0.8557   | 478.08835   | 7.04543   | 1.4899  |
| 2   | 76.953     | VB | 2.7431   | 3.16103e4   | 148.29825 | 98.5101 |

总量 : 3.20884e4 155.34368

\*\*\* 报告结束 \*\*\*



数据文件 D:\Chem32\1\DATA\HX\HX000097.D  
样品名: hx-8-80

IC, n-hexane/i-PrOH =96/4, 0.4ml/min; 214nm

=====  
进样日期 : 2004-1-1 13:11:59  
样品名称 : hx-8-80  
操作者 : hx  
仪器 : 仪器 1  
采集方法 : D:\CHEM32\1\METHODS\ZYY\_LC.M  
最后修改 : 2004-1-1 14:38:08 : hx  
(调用后修改)  
分析方法 : D:\CHEM32\1\METHODS\ZYY\_LC.M  
最后修改 : 2004-1-1 14:42:48 : hx  
(调用后修改)

位置 : -

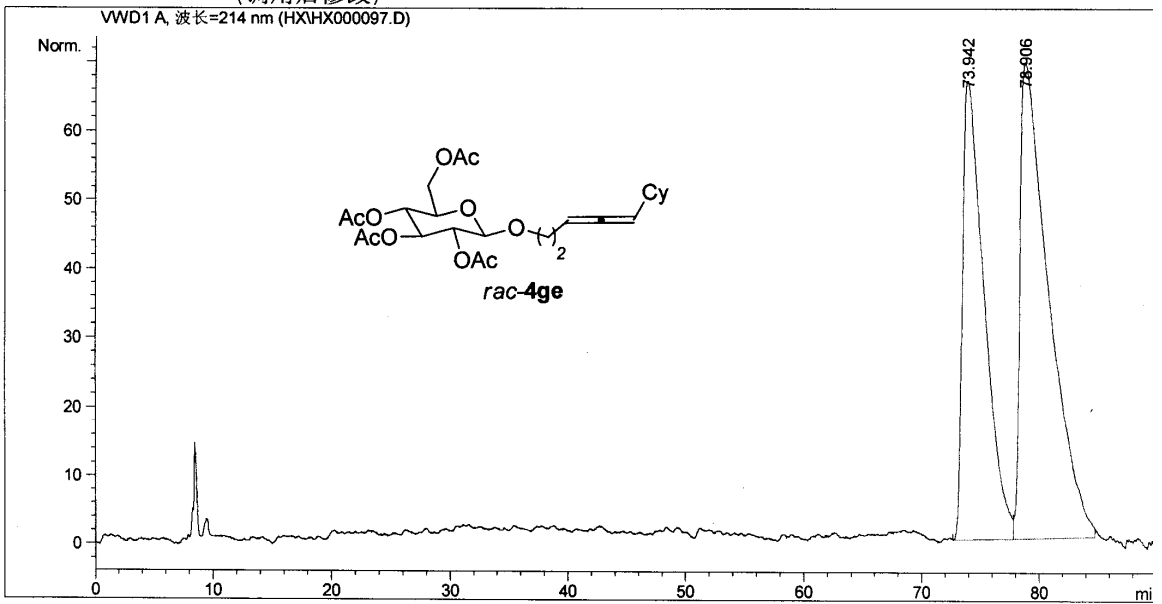

=====  
面积百分比报告  
=====

排序 : 信号  
乘积因子 : 1.0000  
稀释因子 : 1.0000  
内标使用乘积因子和稀释因子

信号 1: VWD1 A, 波长=214 nm

| 峰 # | 保留时间 [min] | 类型 | 峰宽 [min] | 峰面积 mAU *s | 峰高 [mAU] | 峰面积 %   |
|-----|------------|----|----------|------------|----------|---------|
| 1   | 73.942     | BV | 1.6905   | 8520.73438 | 66.34748 | 41.8911 |
| 2   | 78.906     | VB | 2.2042   | 1.18195e4  | 68.93280 | 58.1089 |

总量 : 2.03402e4 135.28028

=====  
\*\*\* 报告结束 \*\*\*

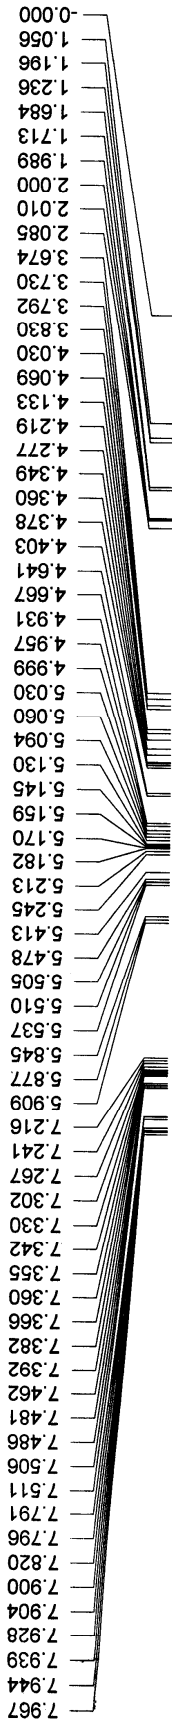

hx-10-58

2014-01-11 14:53:12.937

USER: nmr

SOLVENT: CDCl3

Experiment = zg30

Pulse length = 14.000 usec

Relaxation delay = 1.000 sec

NA = 8

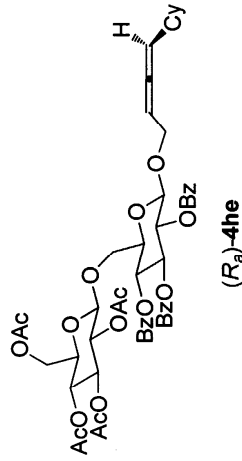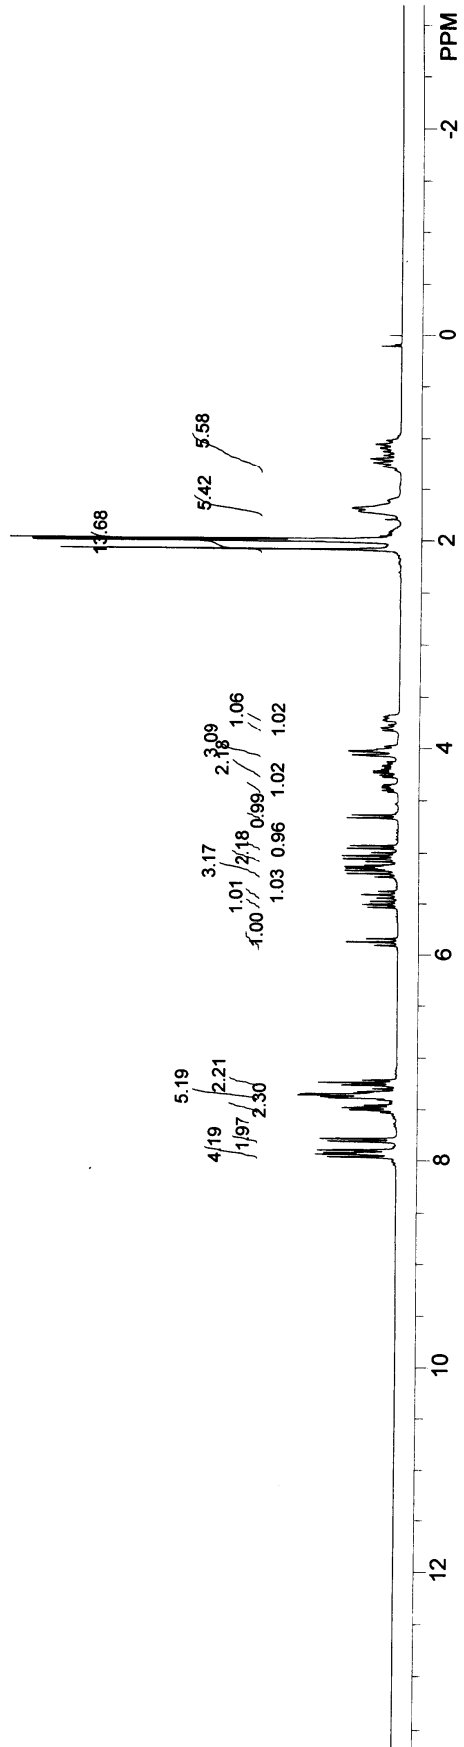

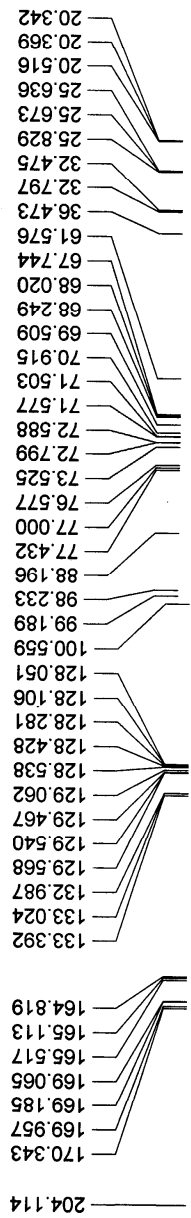

hx-10-58

2014-01-11 15:30:44.687  
 USER: nmr  
 SOLVENT: CDCl3  
 Experiment = zgpg30  
 Pulse length = 9.500 usec  
 Relaxation delay = 2.000 sec  
 NA = 543

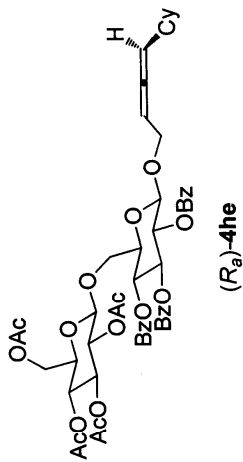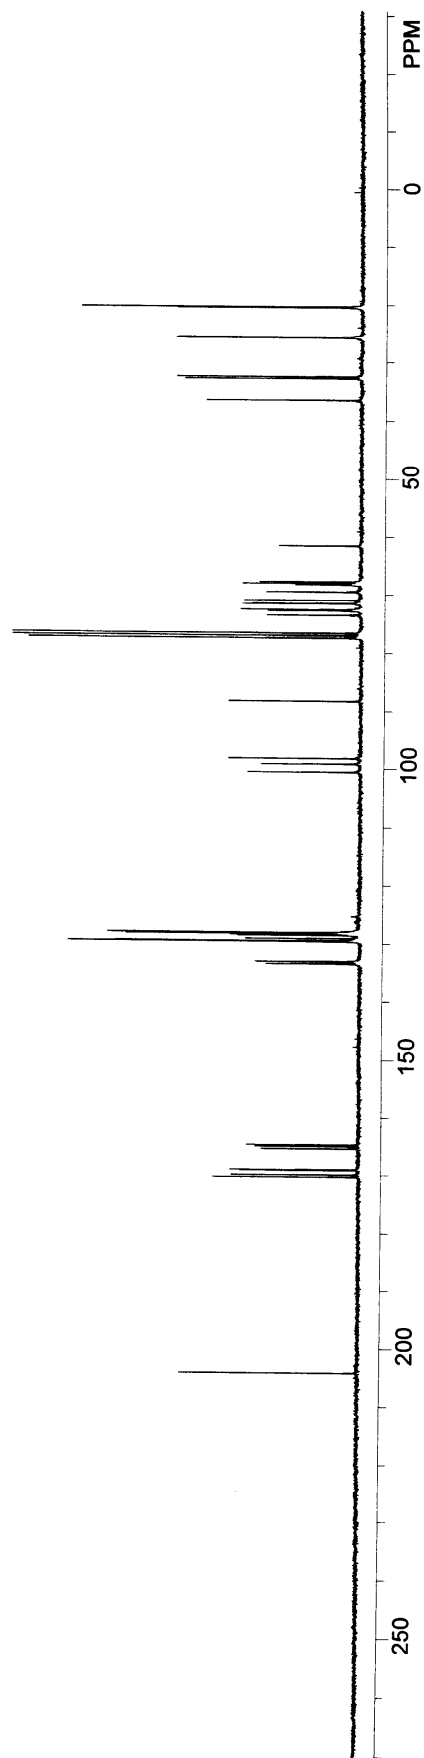

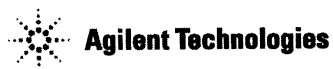

Data file: C:\CHEM32\1\DATA\2014-4621.D  
 Sample name: hx-10-58  
 Instrument: SFC  
 Injection date: 5/5/2014 3:29:06 PM  
 Sample type: Sample  
 Injection: 1 of 1

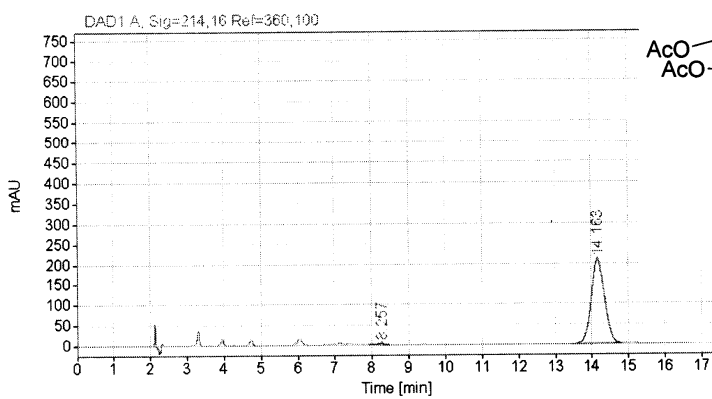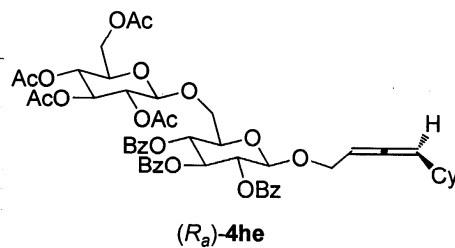

Signal: DAD1 A, Sig=214,16 Ref=360,100

| RT [min] | Type | Width [min] | Area      | Height   | Area%   |
|----------|------|-------------|-----------|----------|---------|
| 8.257    | VB   | 0.1838      | 48.2732   | 3.2780   | 0.9177  |
| 14.163   | BB   | 0.3806      | 5212.0527 | 207.8039 | 99.0823 |
|          |      | Sum         | 5260.3259 |          |         |

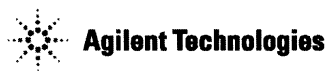

Data file: C:\CHEM32\1\DATA\2014-4622.D

Sample name: hx-8-82-rac-1A-8-2-1.5

Instrument: SFC

Sample type: Sample

Injection date: 5/5/2014 3:58:12 PM

Injection: 1 of 1

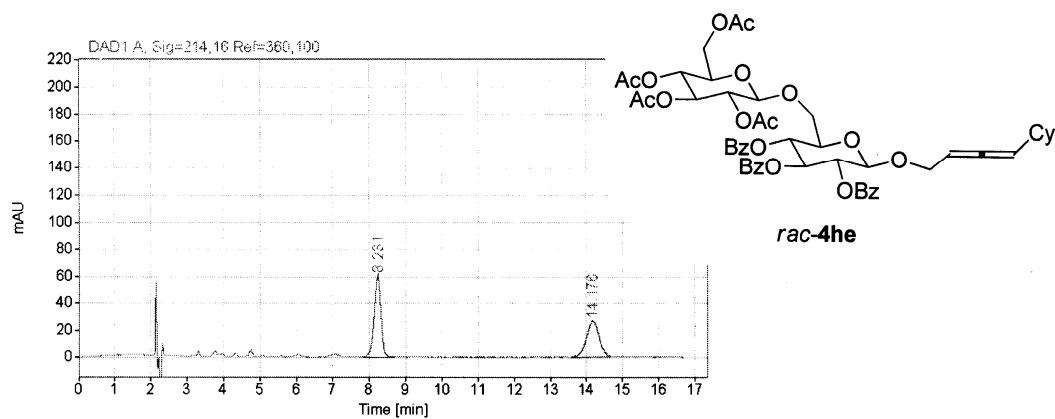

Signal: DAD1 A, Sig=214,16 Ref=360,100

| RT [min] | Type | Width [min] | Area      | Height  | Area%   |
|----------|------|-------------|-----------|---------|---------|
| 8.231    | BB   | 0.1976      | 763.8271  | 59.9527 | 54.4052 |
| 14.176   | VV   | 0.2991      | 640.1336  | 26.1039 | 45.5948 |
|          |      | Sum         | 1403.9607 |         |         |

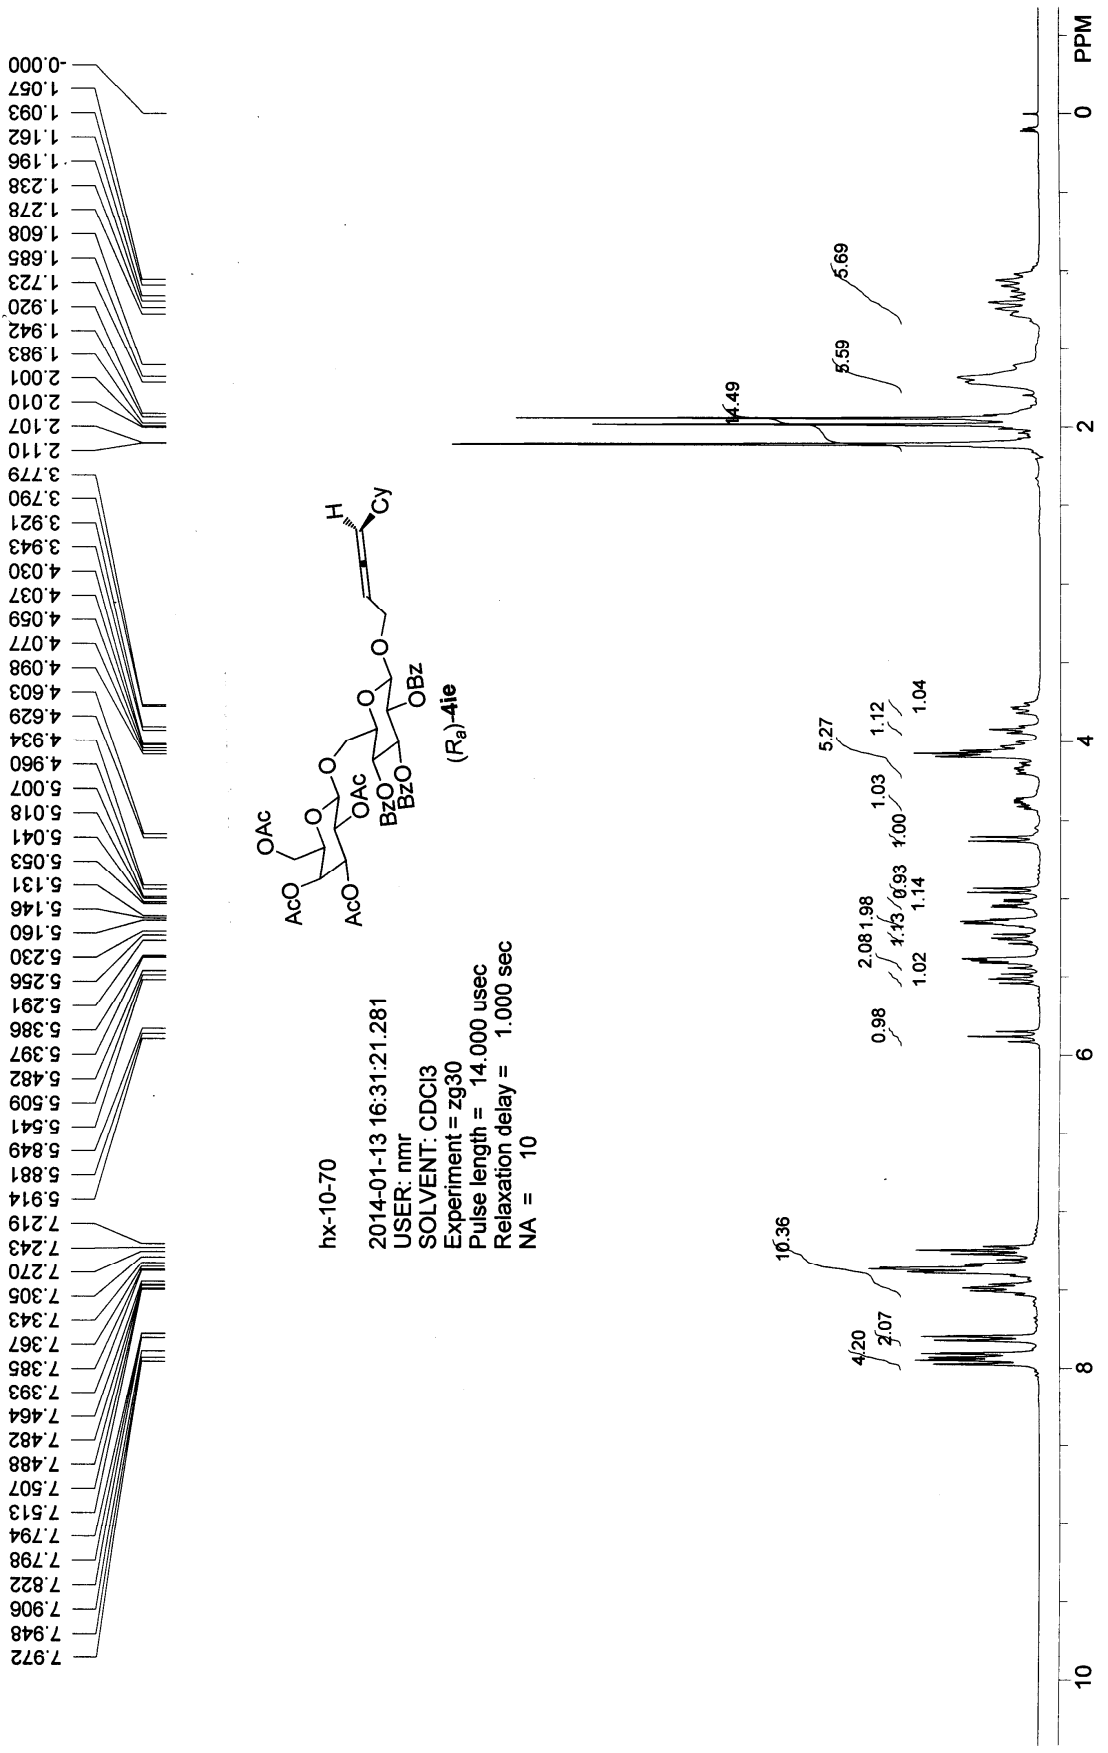

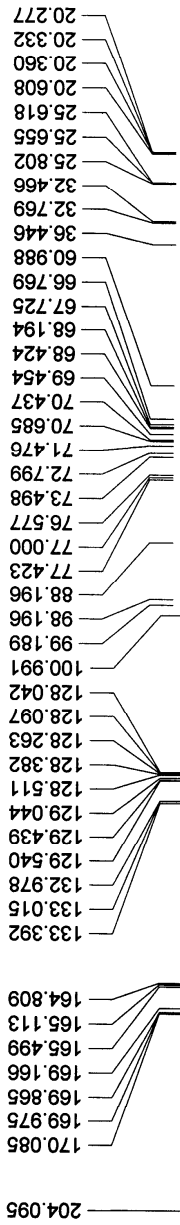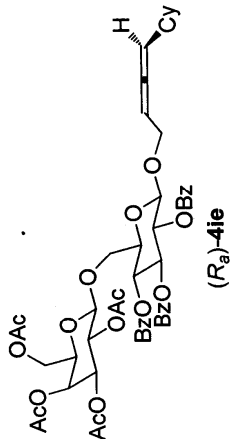

hx-10-70

2014-01-13 19:23:34.203

USER: nmr

SOLVENT: CDCl<sub>3</sub>

Experiment = zgpg30

Pulse length = 9.500 usec

Relaxation delay = 2.000 sec

NA = 240

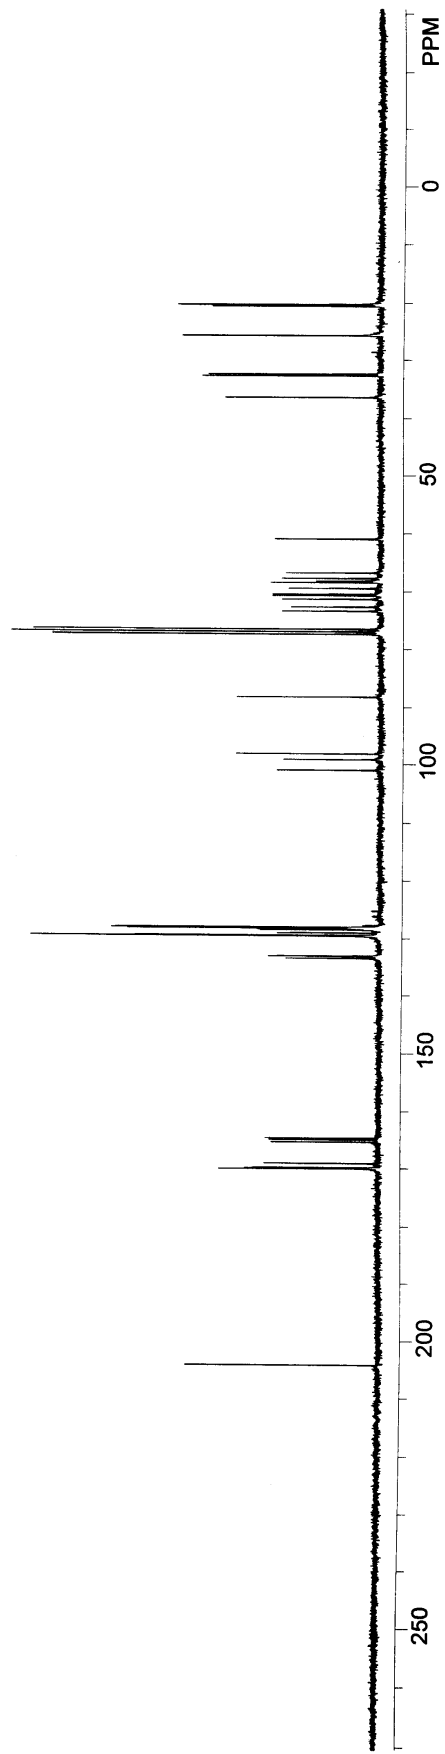

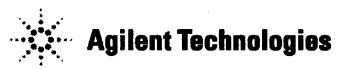

Data file: C:\CHEM32\1\DATA\2014-4609.D  
 Sample name: HX-10-70  
 Instrument: SFC  
 Injection date: 4/29/2014 4:11:15 PM  
 Sample type: Sample  
 Injection: 1 of 1

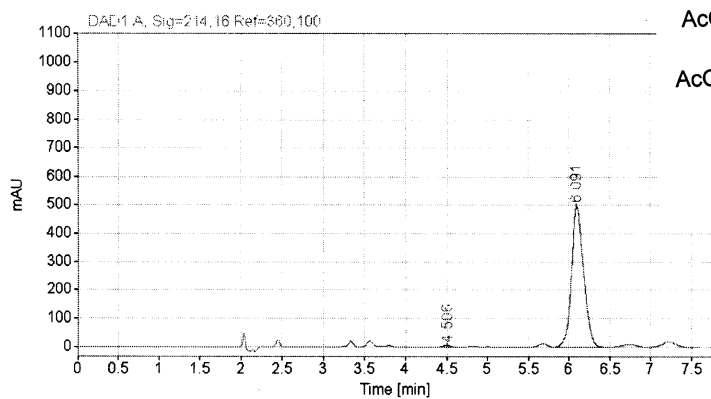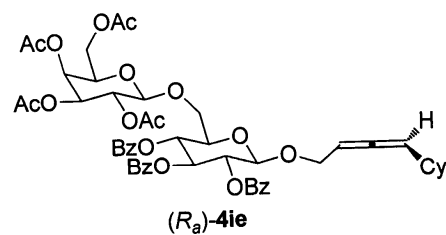

Signal: DAD1 A, Sig=214, 16 Ref=360, 100

| RT [min] | Type | Width [min] | Area      | Height   | Area%   |
|----------|------|-------------|-----------|----------|---------|
| 4.506    | BB   | 0.1045      | 51.9958   | 7.2691   | 0.9978  |
| 6.091    | VV   | 0.1572      | 5158.8315 | 496.7322 | 99.0022 |
|          |      | Sum         | 5210.8274 |          |         |



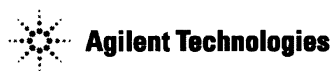

Data file: C:\CHEM32\1\DATA\2014-4610.D

Sample name: HX-8-99-rac-ia-7-3-1.5-214

Instrument: SFC

Sample type: Sample

Injection date: 4/29/2014 4:22:54 PM

Injection: 1 of 1

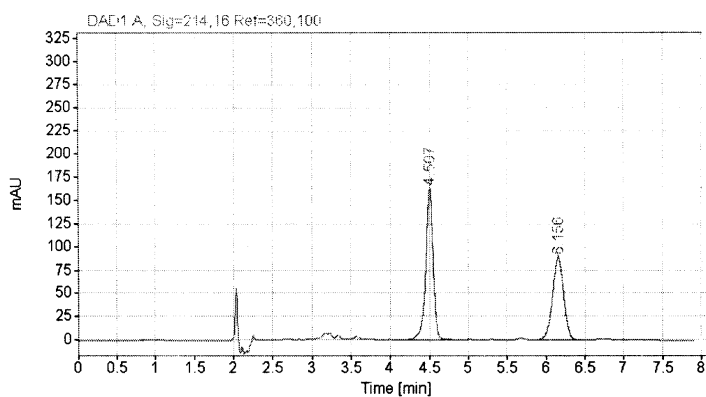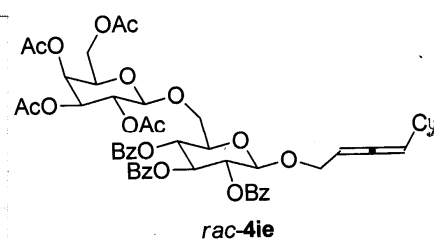

Signal: DAD1 A, Sig=214, 16 Ref=360, 100

| RT [min] | Type | Width [min] | Area      | Height   | Area%   |
|----------|------|-------------|-----------|----------|---------|
| 4.507    | VB   | 0.1003      | 1076.8519 | 162.5107 | 54.8004 |
| 6.156    | BV   | 0.1525      | 888.1928  | 88.9660  | 45.1996 |
|          |      | Sum         | 1965.0447 |          |         |

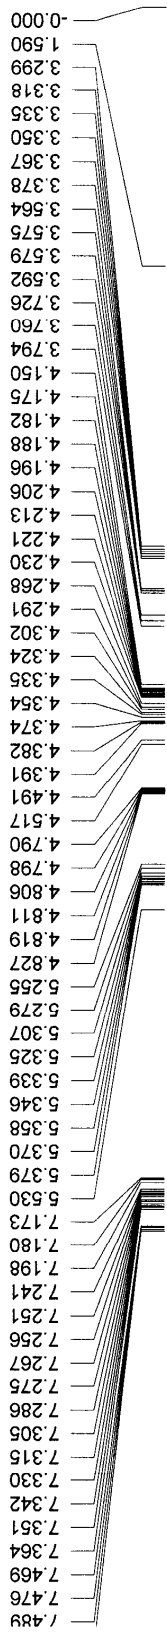

D:\new nuts\DATA\data  
 spect, CDCl3,  
 Fri Jan 30 08:03:11 2015  
 USER: nmr  
 SOLVENT:  
 Experiment = zg30  
 Pulse length = 14.000 usec  
 Recycle delay = 1.000 sec  
 NA = 8  
 PTS1d = 32768  
 F1 = 300.131886 MHz  
 F2 = 1.000000 MHz  
 SW1 = 6188.12 Hz

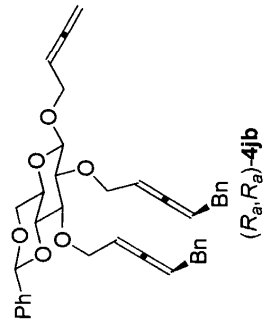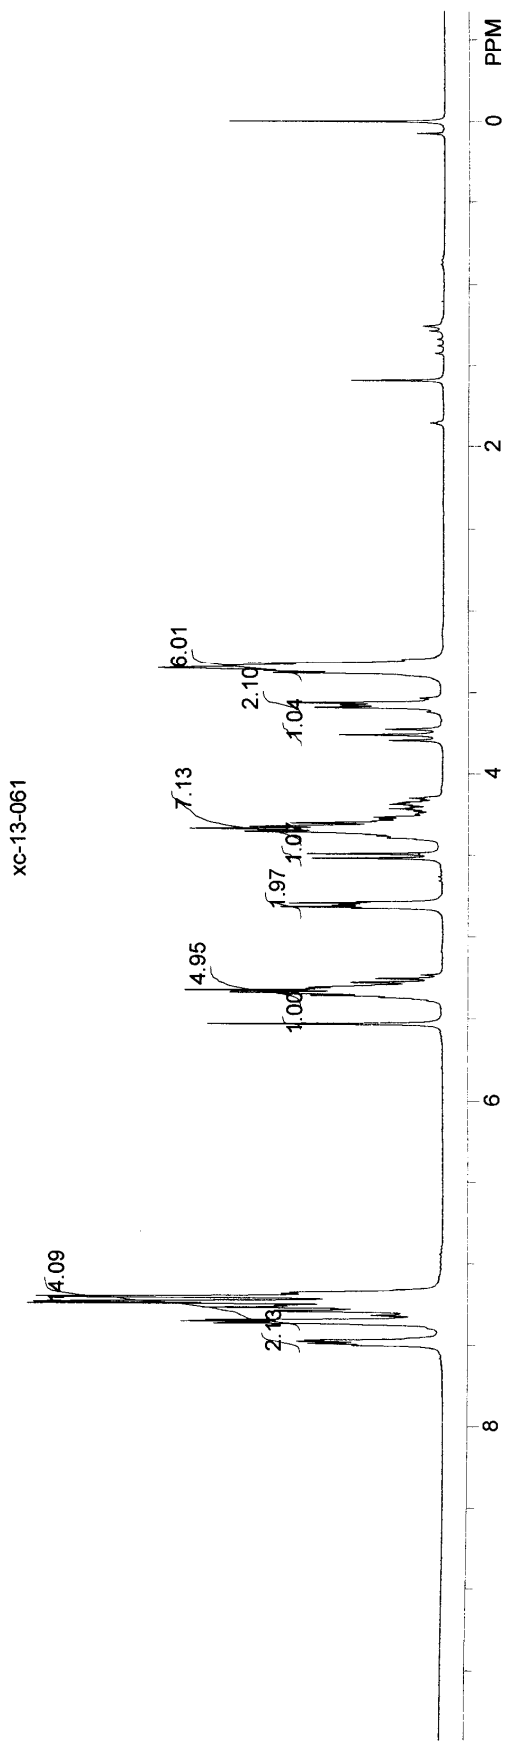

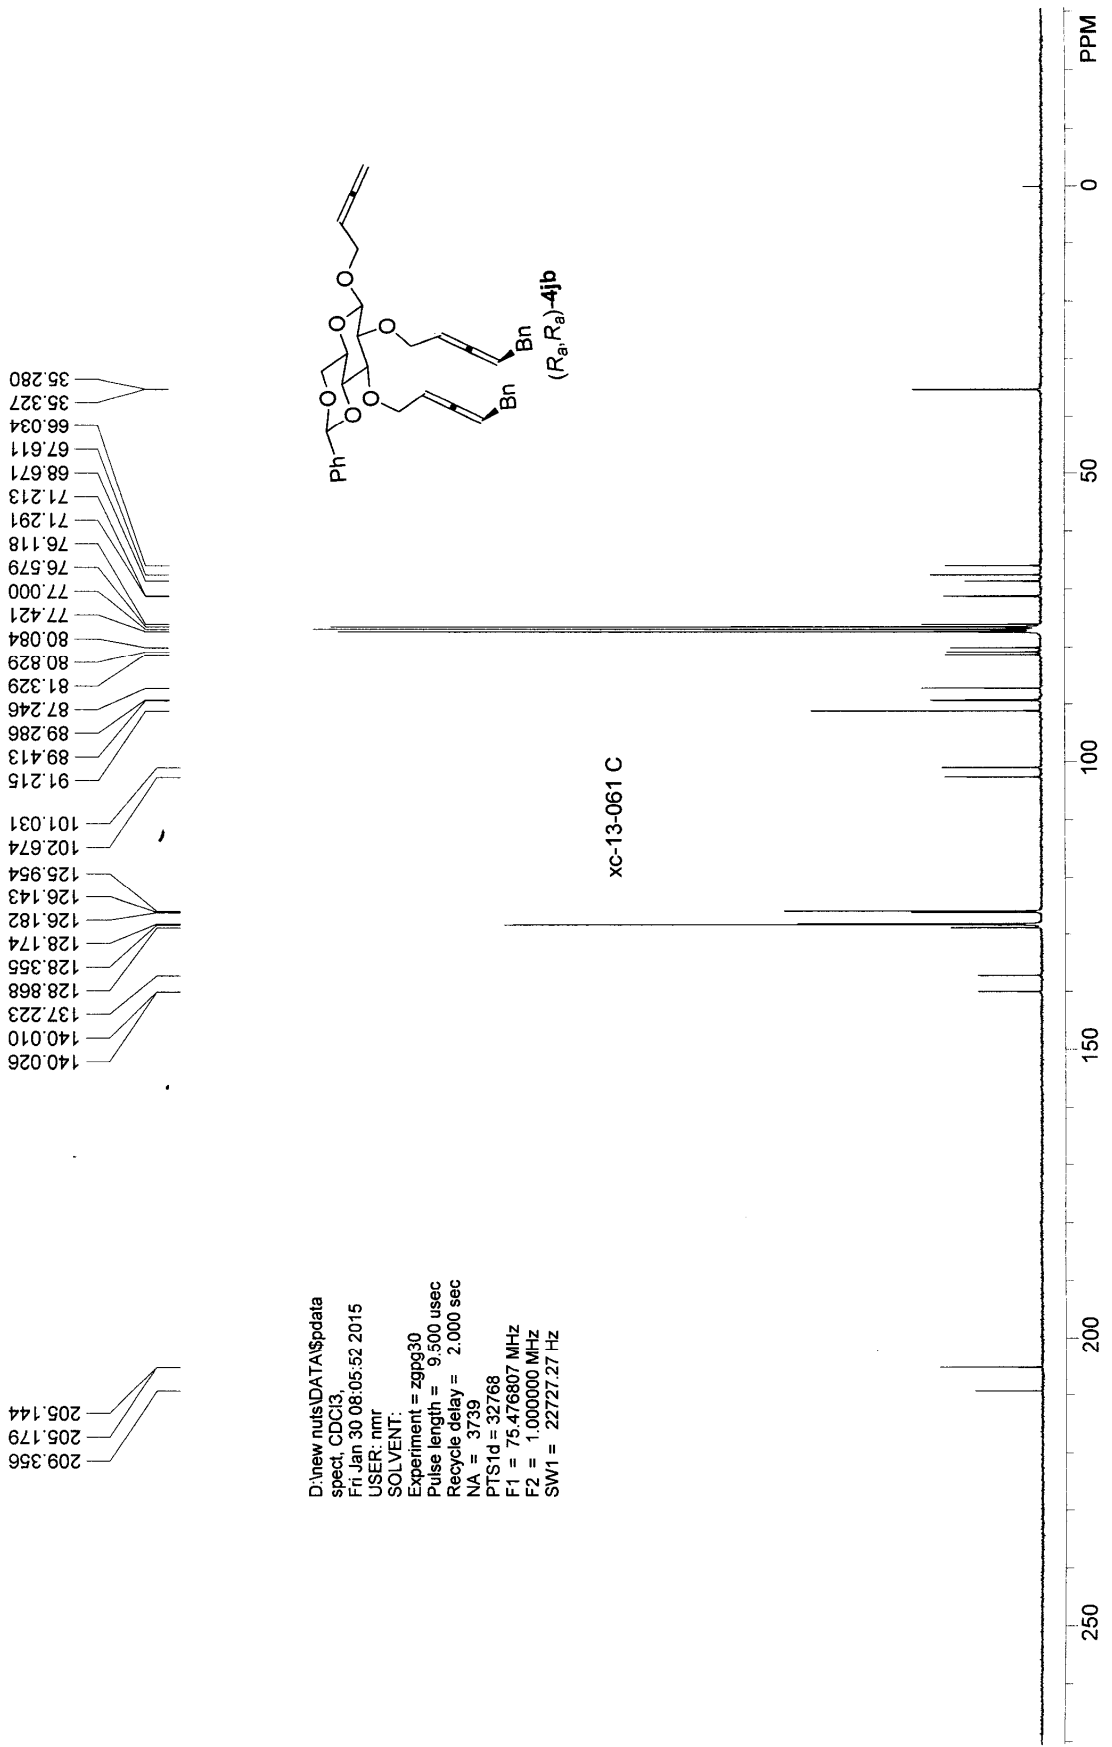

D:\new nuts\DATA\pdata  
 spect, CDCI3,  
 Fri Jan 30 08:05:52 2015  
 USER: nmr  
 SOLVENT:  
 Experiment = zgpg30  
 Pulse length = 9.500 usec  
 Recycle delay = 2.000 sec  
 NA = 3739  
 PTS1d = 32768  
 F1 = 75.476807 MHz  
 F2 = 1.000000 MHz  
 SW1 = 22727.27 Hz

Data File C:\CHEM32\1\DATA\2014-41560.D  
Sample Name: xc-13-061

=====  
Acq. Operator : 系统  
Sample Operator : 系统  
Acq. Instrument : SFC Location : Vial 32  
Injection Date : 2/10/2015 2:57:56 PM  
Inj Volume : 5.000 µl  
Acq. Method : C:\CHEM32\1\METHODS\AGILENT\_SFC6.M  
Last changed : 2/10/2015 2:43:51 PM by 系统  
(modified after loading)  
Analysis Method : C:\CHEM32\1\METHODS\AGILENT\_SFC6.M  
Last changed : 2/11/2015 9:56:08 AM by 系统  
(modified after loading)

Additional Info : Peak(s) manually integrated

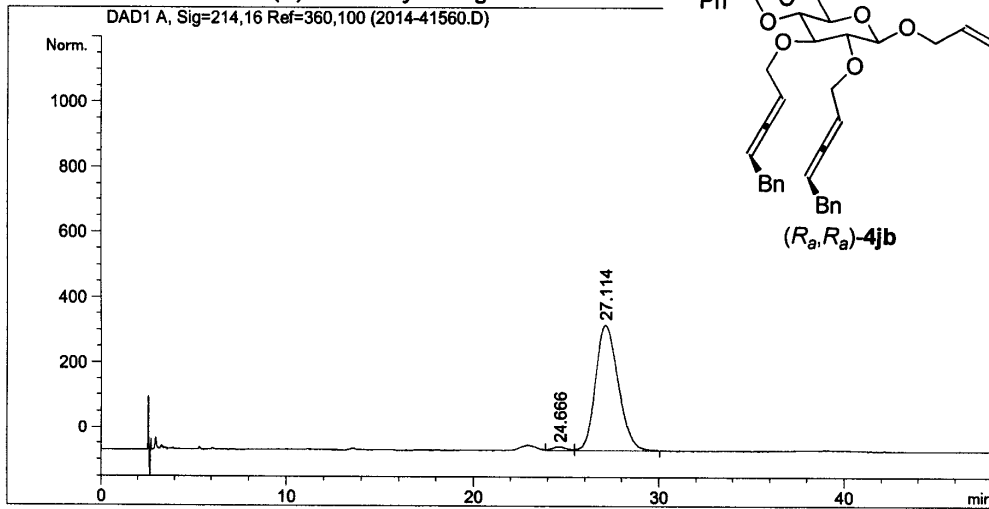

=====  
Area Percent Report  
=====

Sorted By : Signal  
Multiplier : 1.0000  
Dilution : 1.0000  
Do not use Multiplier & Dilution Factor with ISTDs

Signal 1: DAD1 A, Sig=214,16 Ref=360,100

| Peak # | RetTime [min] | Type | Width [min] | Area [mAU*s] | Height [mAU] | Area %  |
|--------|---------------|------|-------------|--------------|--------------|---------|
| 1      | 24.666        | MF R | 0.8034      | 268.68335    | 5.34289      | 1.5081  |
| 2      | 27.114        | FM R | 1.4091      | 1.75478e4    | 205.48734    | 98.4919 |

Totals : 1.78164e4 210.83022

=====  
\*\*\* End of Report \*\*\*

Data File C:\CHEM32\1\DATA\2014-41552.D  
Sample Name: xc-13-55-1-rac-oj-8-2-1.3-214

=====  
Acq. Operator : 系统  
Sample Operator : 系统  
Acq. Instrument : SFC  
Location : Vial 31  
Injection Date : 2/9/2015 2:26:37 PM

Inj Volume : 5.000 µl

Acq. Method : C:\CHEM32\1\METHODS\AGILENT\_SFC6.M  
Last changed : 2/9/2015 1:52:27 PM by 系统  
(modified after loading)

Analysis Method : C:\CHEM32\1\METHODS\AGILENT\_SFC6.M  
Last changed : 2/11/2015 9:49:25 AM by 系统  
(modified after loading)

Additional Info : Peak(s) manually integrated

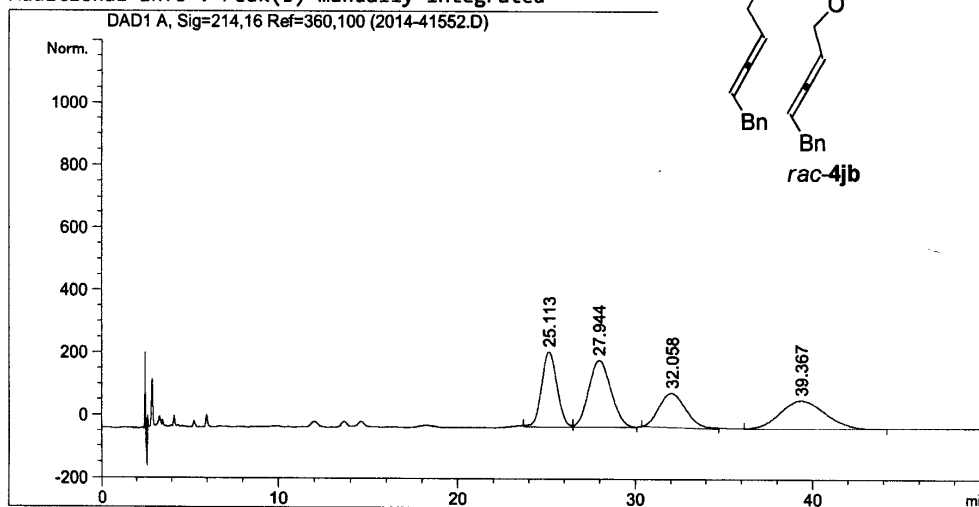

=====  
Area Percent Report  
=====

Sorted By : Signal  
Multiplier : 1.0000  
Dilution : 1.0000  
Do not use Multiplier & Dilution Factor with ISTDs

Signal 1: DAD1 A, Sig=214,16 Ref=360,100

| Peak # | RetTime [min] | Type | Width [min] | Area [mAU*s] | Height [mAU] | Area %  |
|--------|---------------|------|-------------|--------------|--------------|---------|
| 1      | 25.113        | MF R | 0.9331      | 4871.58350   | 81.16325     | 23.6625 |
| 2      | 27.944        | FM R | 1.2599      | 6243.45752   | 72.01936     | 30.3261 |
| 3      | 32.058        | MM R | 1.7414      | 3840.86035   | 36.76054     | 18.6560 |
| 4      | 39.367        | MM R | 2.8739      | 5631.86719   | 30.75925     | 27.3554 |

Totals : 2.05878e4 220.70240

=====  
\*\*\* End of Report \*\*\*



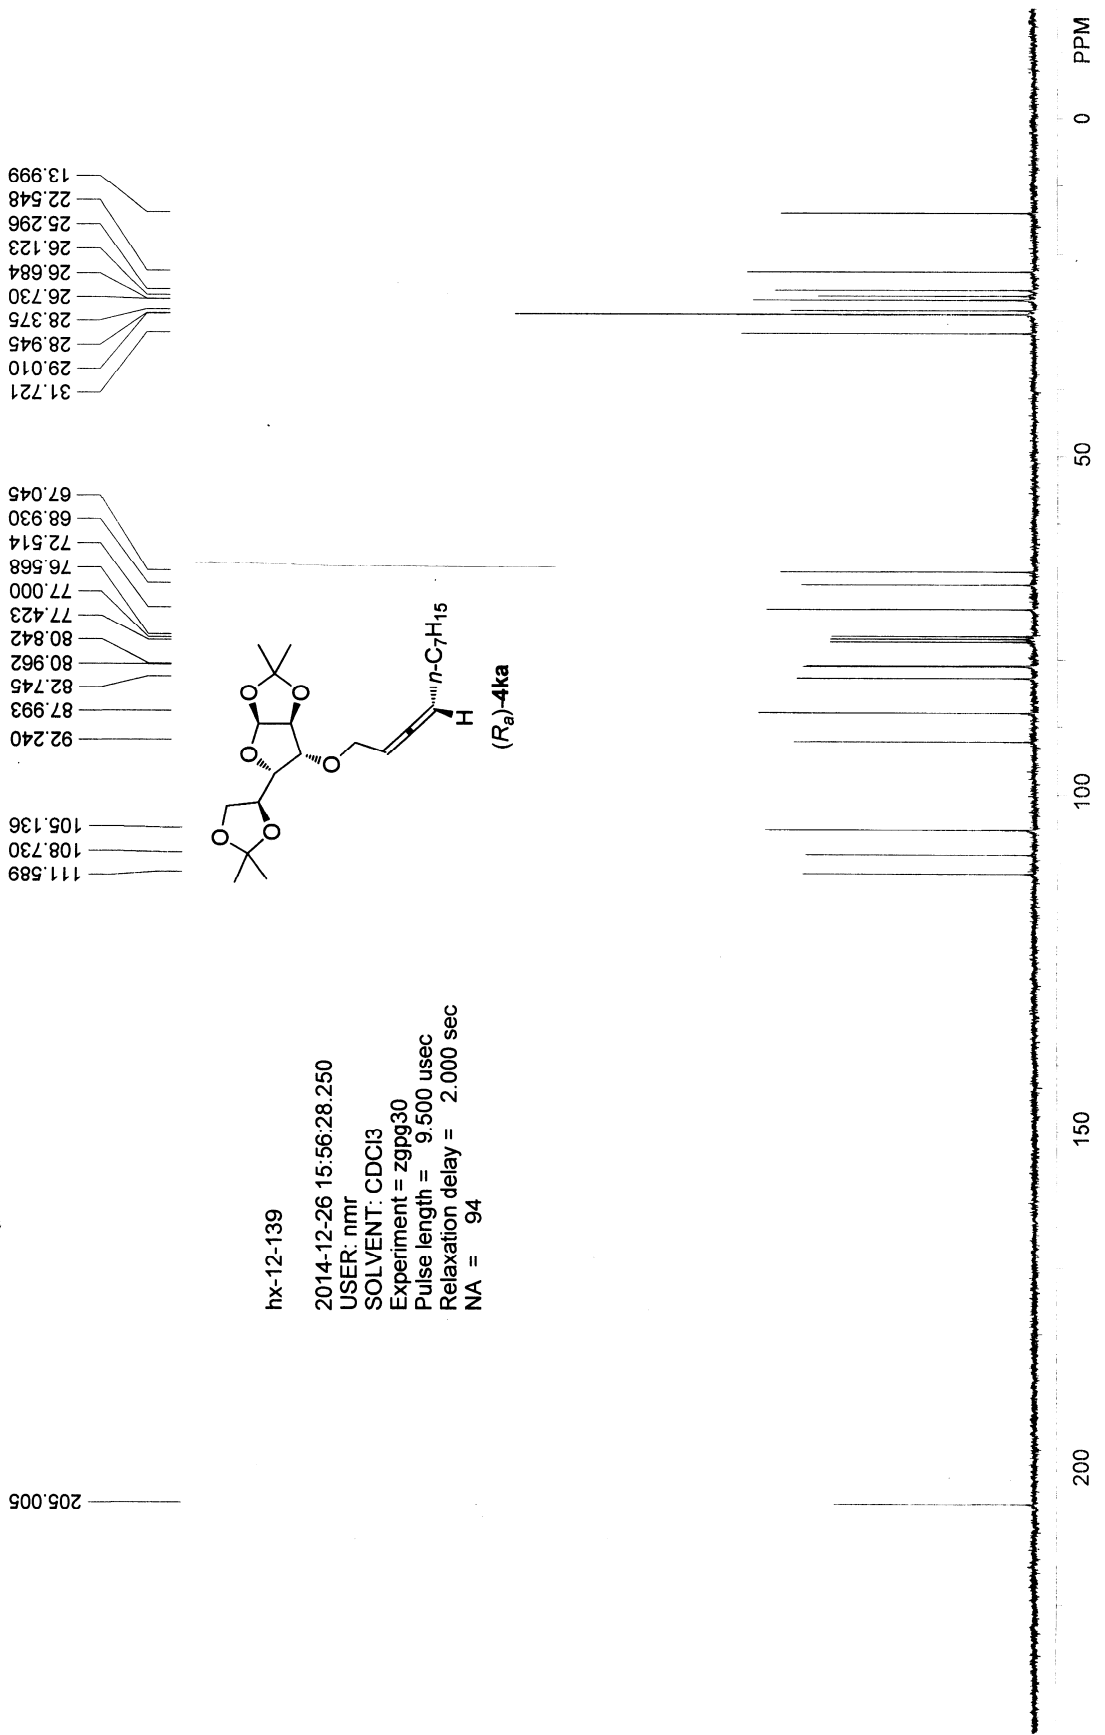

hx-12-139  
 2014-12-26 15:56:28.250  
 USER: nmr  
 SOLVENT: CDCl3  
 Experiment = zgpg30  
 Pulse length = 9.500 usec  
 Relaxation delay = 2.000 sec  
 NA = 94

31.721  
 29.010  
 28.945  
 28.375  
 26.730  
 26.684  
 26.123  
 25.296  
 22.548  
 13.999

92.240  
 87.993  
 82.745  
 80.962  
 80.842  
 77.423  
 77.000  
 76.568  
 72.514  
 68.930  
 67.045

111.589  
 108.730  
 105.136

205.005

# hx-12-139-oz-h-300-1-1-214

实验时间: 2015-01-07, 12:18:20

报告时间: 2015-01-07, 18:13:11

谱图文件: D:\zhuguangji\hx\20150107\hx-12-139-oz-h-300-1-1-214...org

实验内容简介:

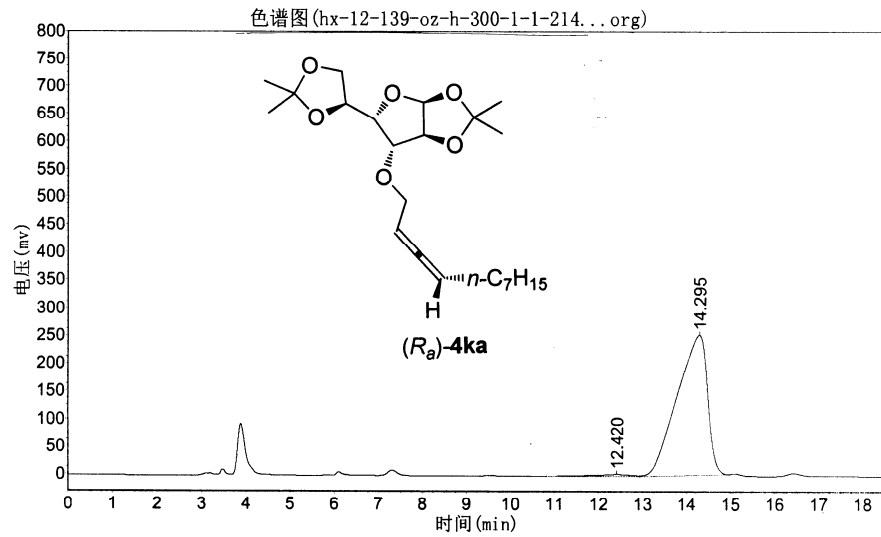

分析结果表

| 峰号 | 峰名 | 保留时间   | 峰高         | 峰面积          | 含量       |
|----|----|--------|------------|--------------|----------|
| 1  |    | 12.420 | 3300.135   | 192895.328   | 1.5743   |
| 2  |    | 14.295 | 252215.625 | 12059923.000 | 98.4257  |
| 总计 |    |        | 255515.760 | 12252818.328 | 100.0000 |



# hx-12-140-oz-h-300-1-1-214

实验时间: 2015-01-07, 11:02:22

报告时间: 2015-01-08, 10:49:50

谱图文件: d:\zhuguangjiong\hx\20150107\hx-12-140-oz-h-300-1-1-214.org

实验内容简介:

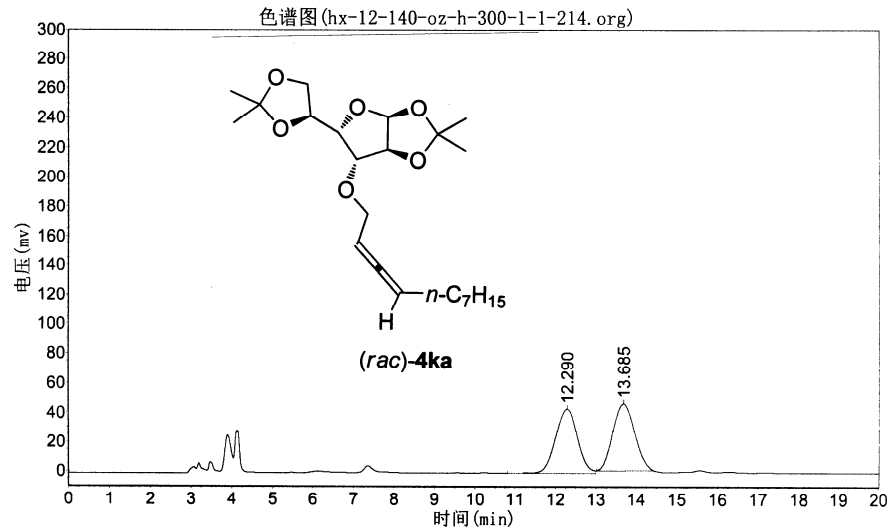

分析结果表

| 峰号 | 峰名 | 保留时间   | 峰高        | 峰面积         | 含量       |
|----|----|--------|-----------|-------------|----------|
| 1  |    | 12.290 | 43782.520 | 1654257.625 | 49.3741  |
| 2  |    | 13.685 | 45445.836 | 1696201.375 | 50.6259  |
| 总计 |    |        | 89228.355 | 3350459.000 | 100.0000 |



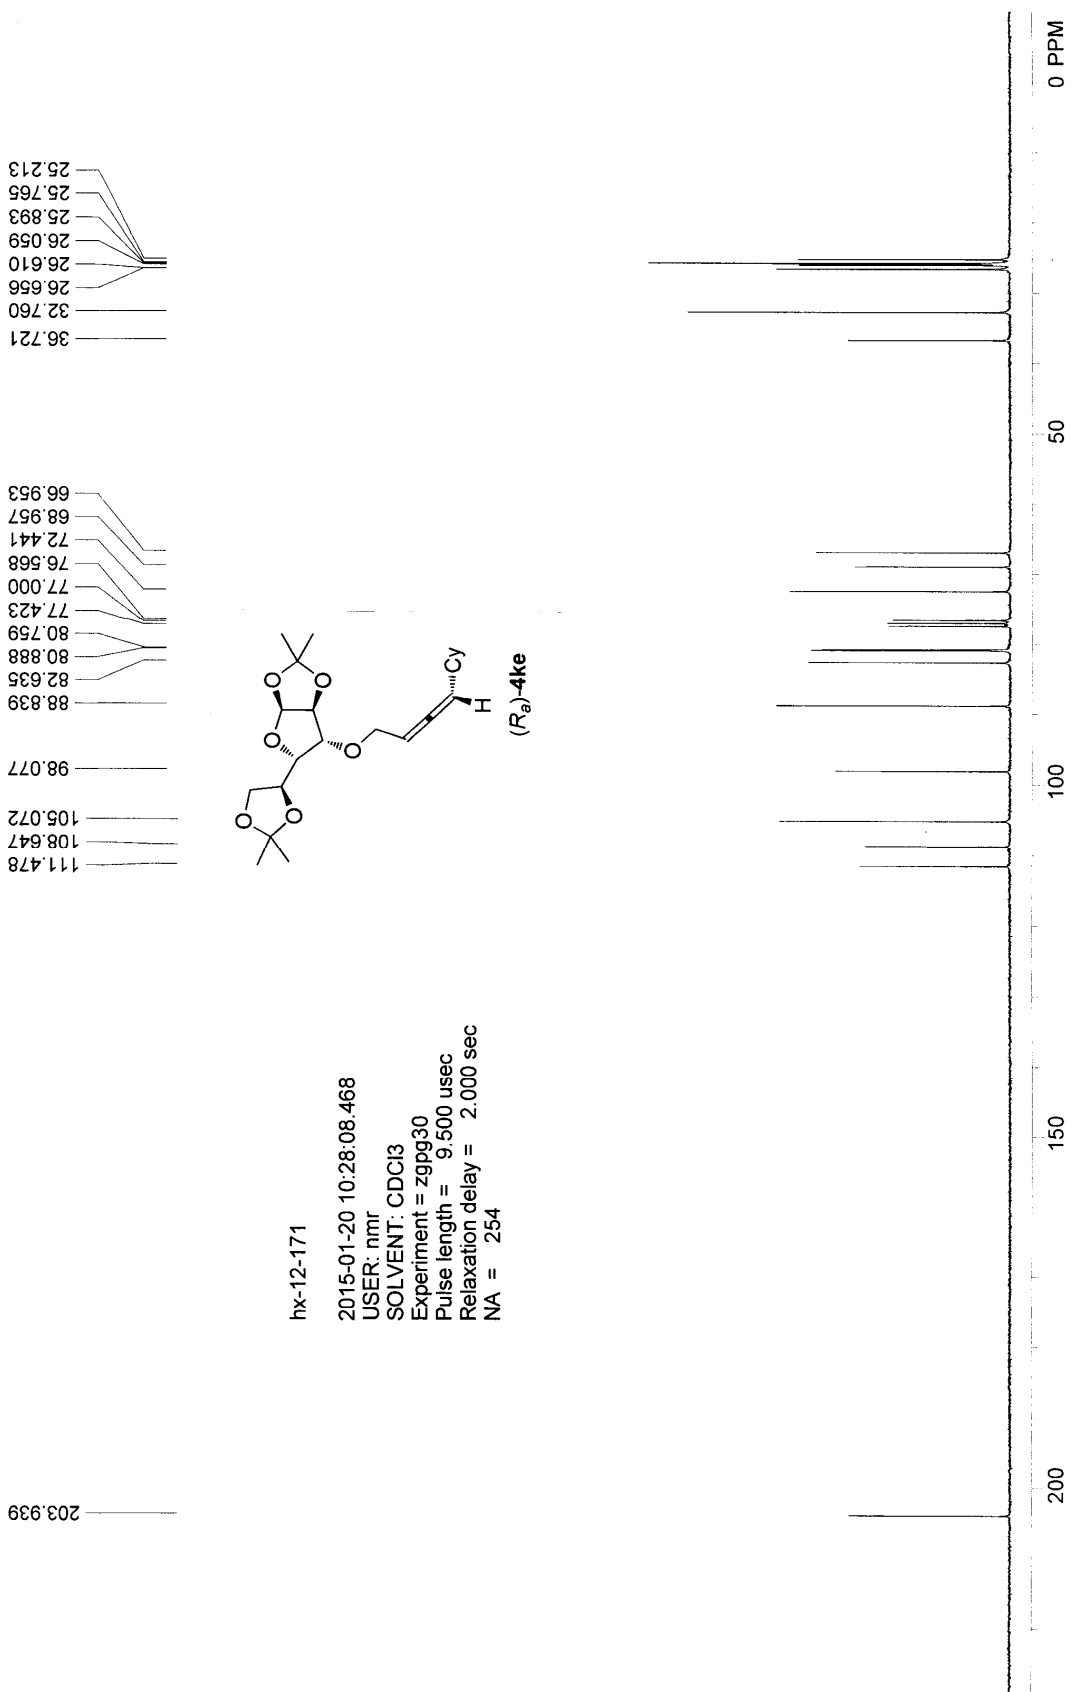

36.721  
32.760  
26.656  
26.610  
26.059  
25.893  
25.765  
25.213

66.953  
68.957  
72.441  
76.568  
77.000  
77.423  
80.759  
80.888  
82.635  
88.839

98.077  
105.072  
108.647  
111.478

203.939

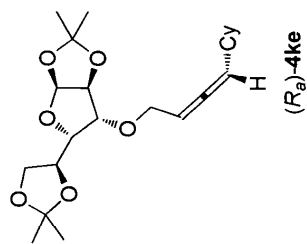

hx-12-171

2015-01-20 10:28:08.468

USER: nmr

SOLVENT: CDCl3

Experiment = zgpg30

Pulse length = 9.500 usec

Relaxation delay = 2.000 sec

NA = 254



# hx-12-172-oz-h-100-1-0.3-214

实验时间: 2015-01-21, 15:44:52

报告时间: 2015-01-21, 17:46:20

谱图文件: D:\zhuguangjiong\hx\20150121\hx-12-172-oz-h-100-1-0.3-214.org

实验内容简介:

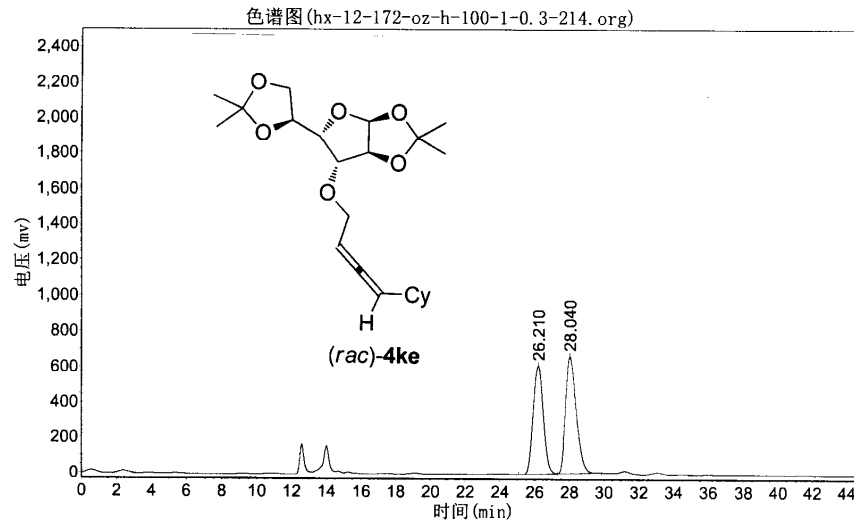

分析结果表

| 峰号 | 峰名 | 保留时间   | 峰高          | 峰面积          | 含量       |
|----|----|--------|-------------|--------------|----------|
| 1  |    | 26.210 | 613467.375  | 24778642.000 | 46.5889  |
| 2  |    | 28.040 | 659881.563  | 28407096.000 | 53.4111  |
| 总计 |    |        | 1273348.938 | 53185738.000 | 100.0000 |

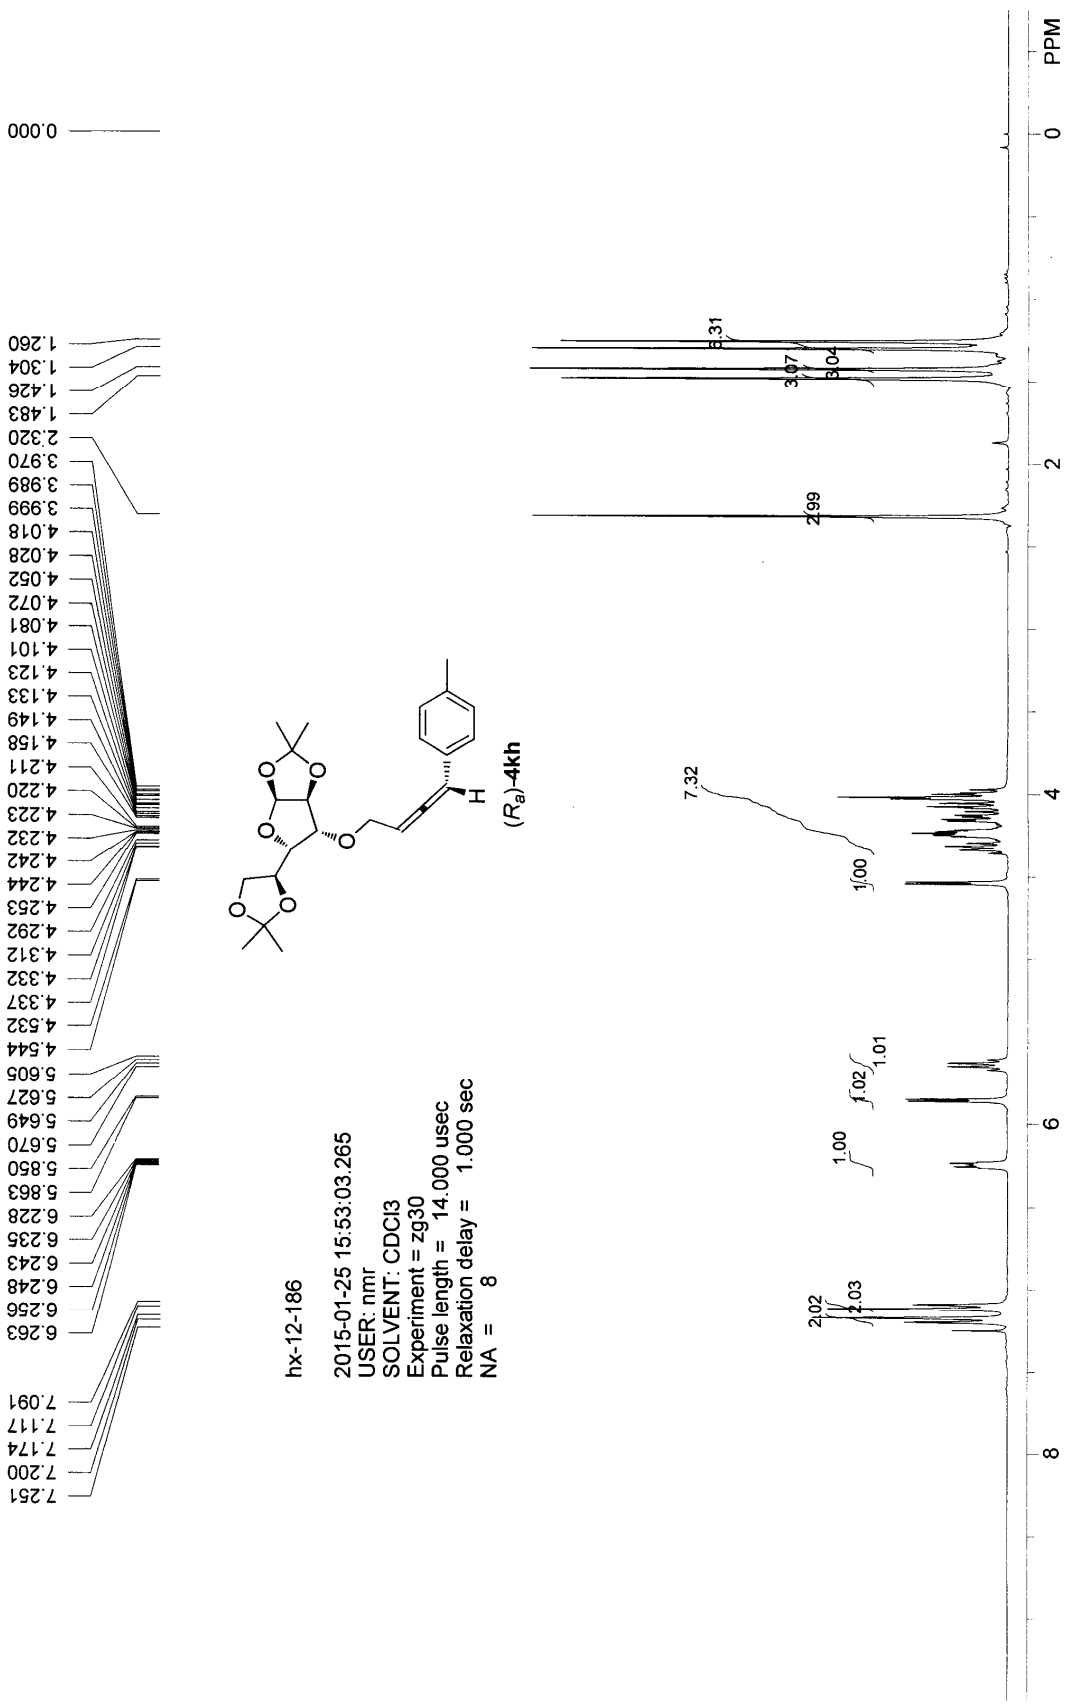

7.251  
 7.200  
 7.174  
 7.117  
 7.091  
 6.263  
 6.256  
 6.248  
 6.243  
 6.235  
 6.228  
 5.863  
 5.850  
 5.670  
 5.649  
 5.627  
 5.605  
 4.544  
 4.532  
 4.337  
 4.332  
 4.312  
 4.292  
 4.253  
 4.244  
 4.242  
 4.232  
 4.223  
 4.220  
 4.211  
 4.158  
 4.149  
 4.133  
 4.123  
 4.101  
 4.081  
 4.072  
 4.052  
 4.028  
 4.018  
 3.999  
 3.970  
 3.970  
 2.320  
 1.483  
 1.426  
 1.304  
 1.260  
 0.000

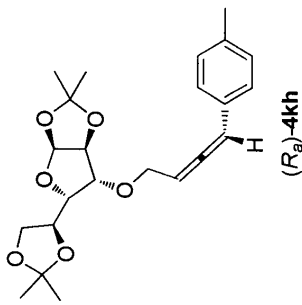

hx-12-186  
 2015-01-25 15:53:03.265  
 USER: nmr  
 SOLVENT: CDCl3  
 Experiment = zg30  
 Pulse length = 14.000 usec  
 Relaxation delay = 1.000 sec  
 NA = 8



# hx-12-186-ia-100-1-0.8-214

实验时间: 2015/2/5, 14:32:25

报告时间: 2015/2/5, 17:05:31

谱图文件: D:\zhuguangji\hx\20150205\hx-12-186-ia-100-1-0.8-214.org

实验内容简介:

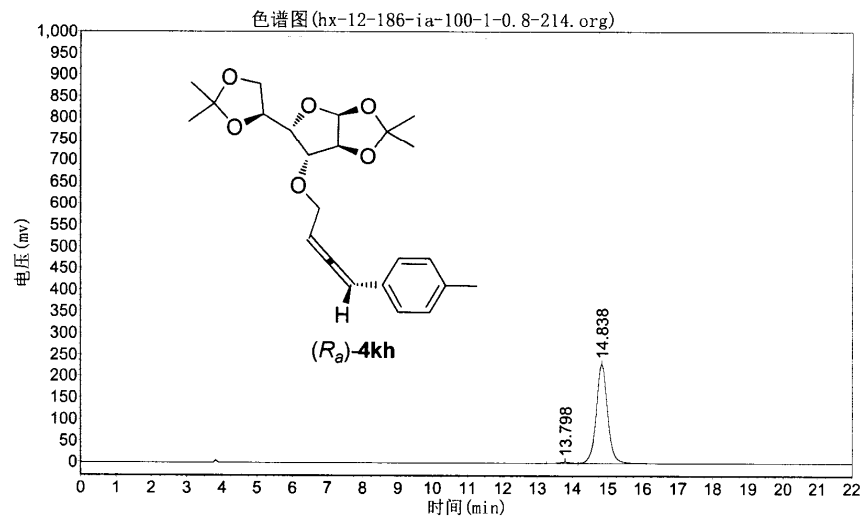

分析结果表

| 峰号 | 峰名 | 保留时间   | 峰高         | 峰面积         | 含量       |
|----|----|--------|------------|-------------|----------|
| 1  |    | 13.798 | 2998.733   | 59516.047   | 1.1298   |
| 2  |    | 14.838 | 231547.188 | 5208389.000 | 98.8702  |
| 总计 |    |        | 234545.921 | 5267905.047 | 100.0000 |



# hx-12-187-ia-100-1-0.8-214

实验时间: 2015/2/5, 13:54:57

报告时间: 2015/2/5, 17:04:30

谱图文件: D:\zhuguangjiong\hx\20150205\hx-12-187-ia-100-1-0.8-214.org

实验内容简介:

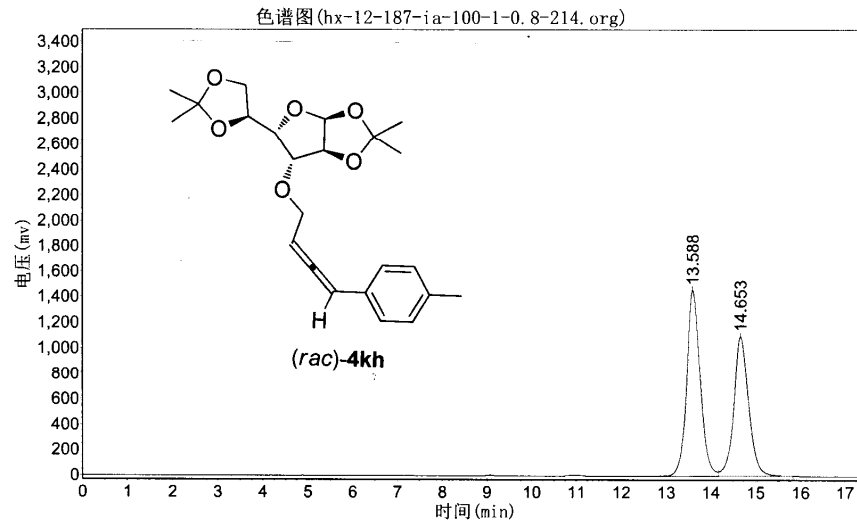

分析结果表

| 峰号 | 峰名 | 保留时间   | 峰高          | 峰面积          | 含量       |
|----|----|--------|-------------|--------------|----------|
| 1  |    | 13.588 | 1456278.625 | 30375580.000 | 54.7016  |
| 2  |    | 14.653 | 1096109.250 | 25153990.000 | 45.2984  |
| 总计 |    |        | 2552387.875 | 55529570.000 | 100.0000 |

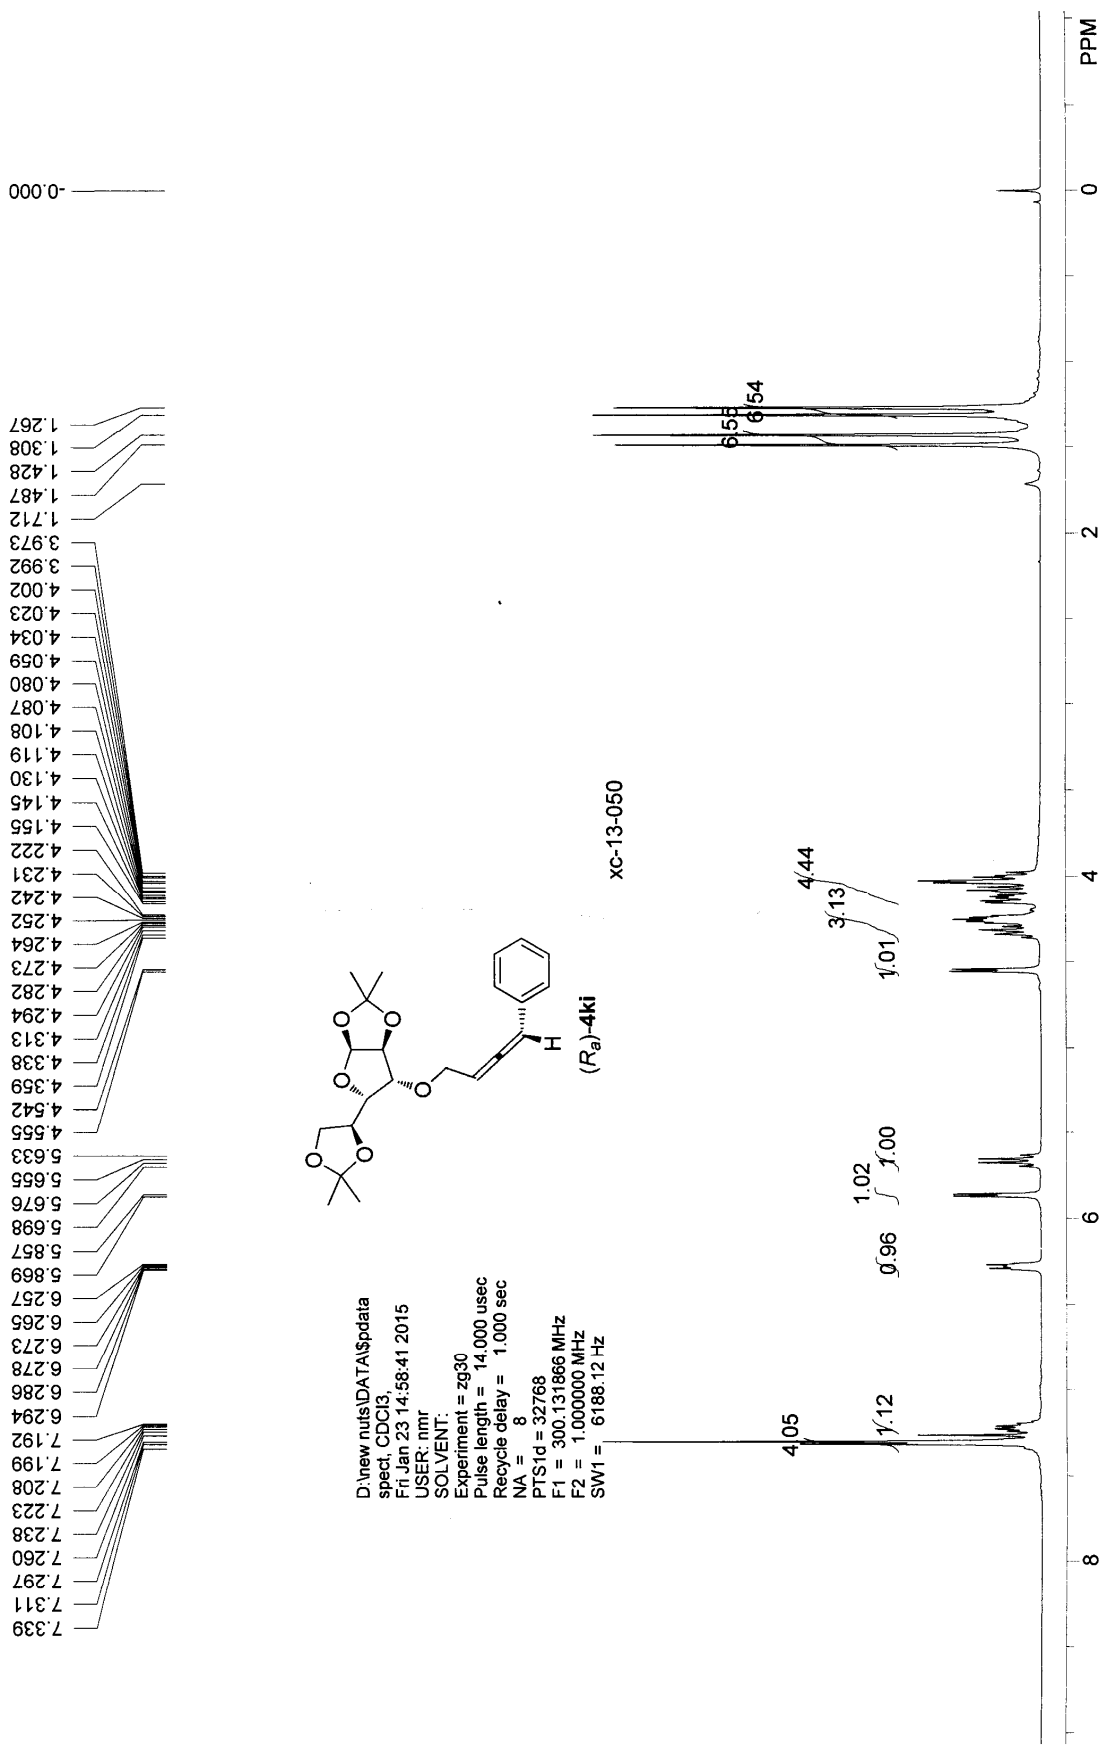

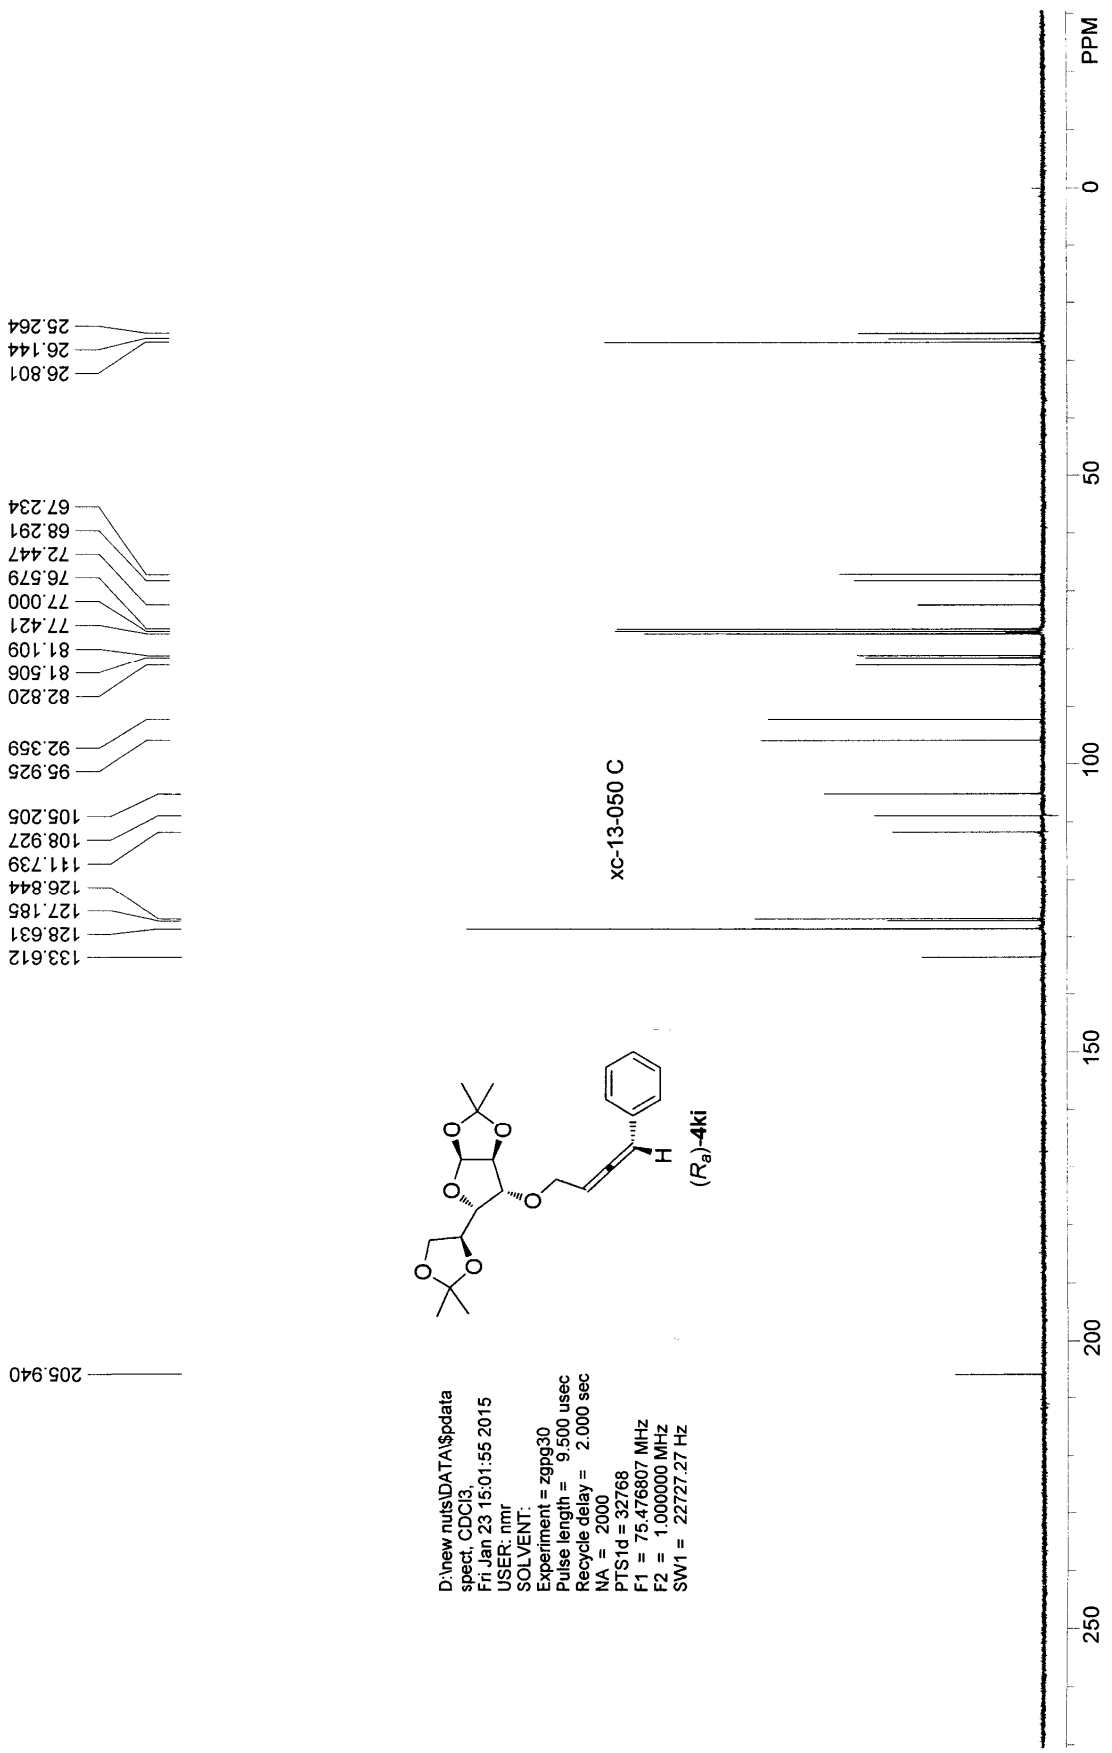

D:\new nuts\DATA\pdata  
 spect\_ CDCI3  
 Fri Jan 23 15:01:55 2015  
 USER: nmr  
 SOLVENT:  
 Experiment = z9pg30  
 Pulse length = 9.500 usec  
 Recycle delay = 2.000 sec  
 NA = 2000  
 PTS1d = 32768  
 F1 = 75.476807 MHz  
 F2 = 1.000000 MHz  
 SW1 = 22727.27 Hz

中国科学院上海有机化学研究所

Project Name: defaults for copy

Reported by User: Breeze user (Breeze)

Breeze 2  
HPLC System

### SAMPLE INFORMATION

|                   |                         |                  |                       |
|-------------------|-------------------------|------------------|-----------------------|
| Sample Name:      | xc-13-50-ib-100-1-1-214 | Acquired By:     | Breeze                |
| Sample Type:      | 未知                      | Date Acquired:   | 2015/2/6 10:28:08 CST |
| Vial:             | 1                       | Acq. Method:     | zg1001                |
| Injection #:      | 27                      | Date Processed:  | 2015/2/6 17:25:41 CST |
| Injection Volume: | 25.00 u                 | Channel Name:    | V02489 ChA            |
| Run Time:         | 40.00 Minutes           | Channel Desc.:   | V02489 ChA.214nm      |
| Column Type:      |                         | Sample Set Name: |                       |

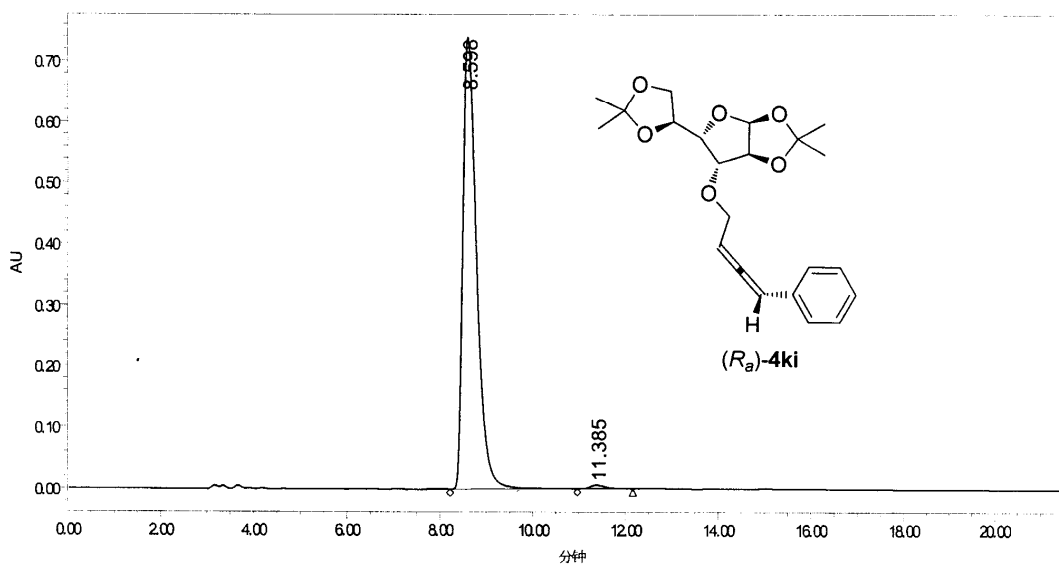

|   | RT<br>(min) | Area<br>(峰面积) | %Area | Hight<br>(峰高) | %<br>Hight |
|---|-------------|---------------|-------|---------------|------------|
| 1 | 8.596       | 15236250      | 99.15 | 739536        | 99.21      |
| 2 | 11.385      | 131097        | 0.85  | 5890          | 0.79       |

Report Method: Individual Report.ASC

Page: 1 (共计 1)

Printed: 2015/2/6

17:27:05.FRC

中国科学院上海有机化学研究所

Project Name: defaults for copy

Reported by User: Breeze user (Breeze)

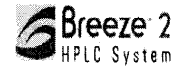

### SAMPLE INFORMATION

|                   |                         |                  |                       |
|-------------------|-------------------------|------------------|-----------------------|
| Sample Name:      | xc-13-52-ib-100-1-1-214 | Acquired By:     | Breeze                |
| Sample Type:      | 未知                      | Date Acquired:   | 2015/2/6 9:51:46 CST  |
| Vial:             | 1                       | Acq. Method:     | zgj1001               |
| Injection #:      | 25                      | Date Processed:  | 2015/2/6 17:25:09 CST |
| Injection Volume: | 25.00 u                 | Channel Name:    | V2489 ChA             |
| Run Time:         | 40.00 Minutes           | Channel Desc.:   | V2489 ChA.214mm       |
| Column Type:      |                         | Sample Set Name: |                       |

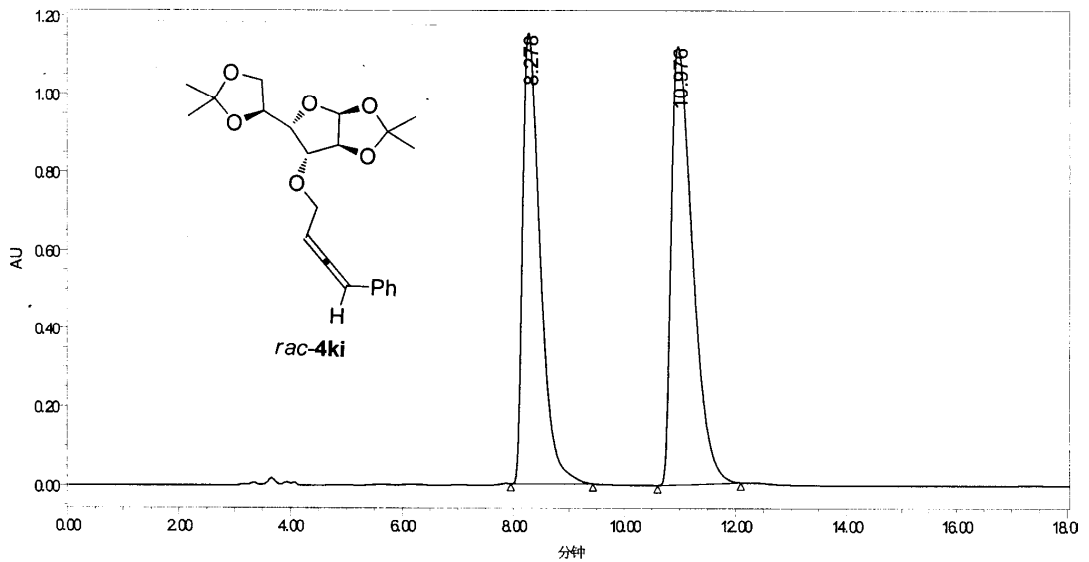

|   | RT<br>(min) | Area<br>(峰面积) | %Area | Hight<br>(峰高) | %<br>Hight |
|---|-------------|---------------|-------|---------------|------------|
| 1 | 8.278       | 2529880       | 45.88 | 115192        | 50.68      |
| 2 | 10.978      | 29837412      | 54.12 | 112068        | 49.31      |



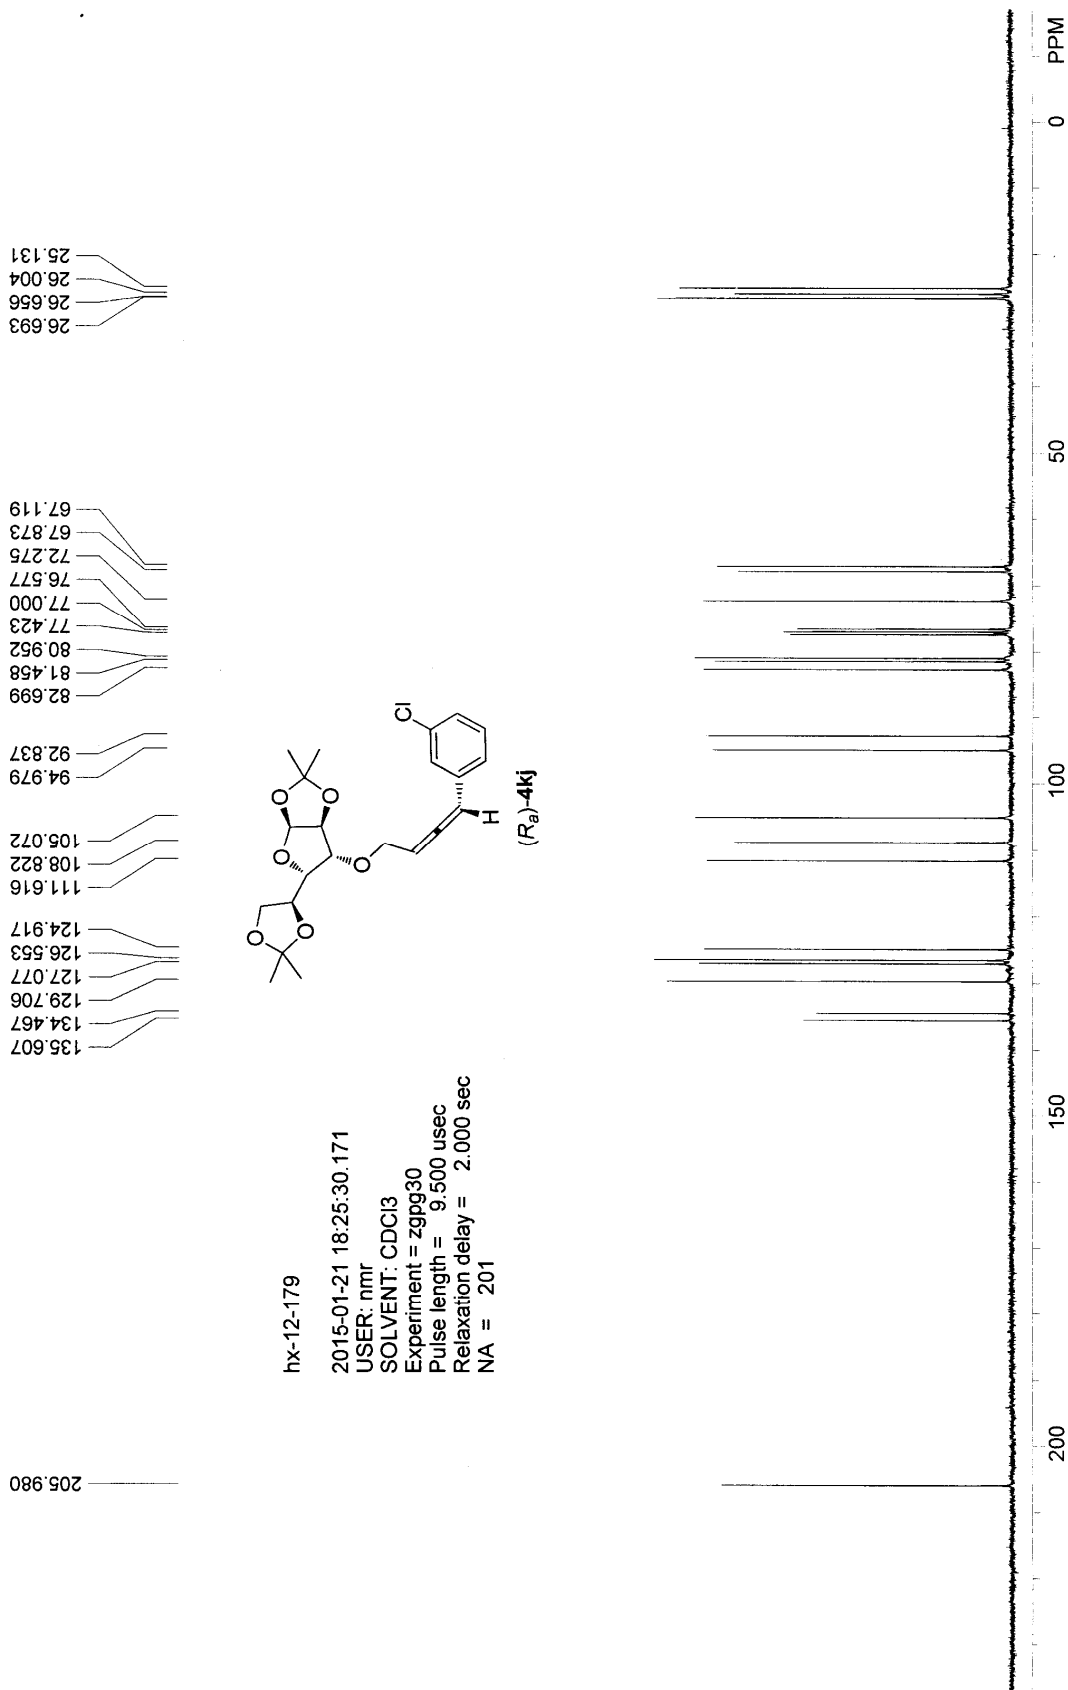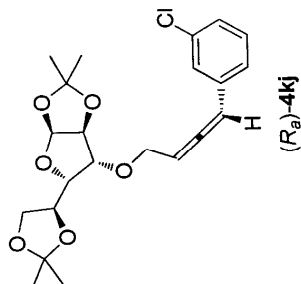

hx-12-179  
 2015-01-21 18:25:30.171  
 USER: nmr  
 SOLVENT: CDCl3  
 Experiment = zgpg30  
 Pulse length = 9.500 usec  
 Relaxation delay = 2.000 sec  
 NA = 201

# hx-12-179-ia-200-1-0.8-214

实验时间: 2015/2/5, 17:12:44

报告时间: 2015/2/5, 17:50:47

谱图文件: D:\zhuguangjiong\hx\20150205\hx-12-179-ia-200-1-0.8-214.org

实验内容简介:

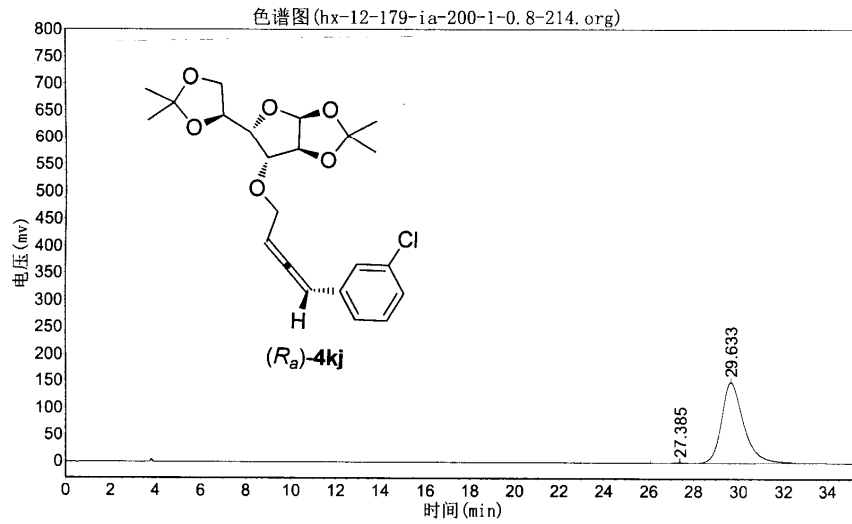

分析结果表

| 峰号 | 峰名 | 保留时间   | 峰高         | 峰面积          | 含量       |
|----|----|--------|------------|--------------|----------|
| 1  |    | 27.385 | 943.689    | 48243.895    | 0.4687   |
| 2  |    | 29.633 | 149705.563 | 10245188.000 | 99.5313  |
| 总计 |    |        | 150649.252 | 10293431.895 | 100.0000 |



# hx-12-180-ia-200-1-0.8-214

实验时间: 2015/2/5, 16:33:13

报告时间: 2015/2/5, 17:49:31

谱图文件: D:\zhuguangji\hx\20150205\hx-12-180-ia-200-1-0.8-214.org

实验内容简介:

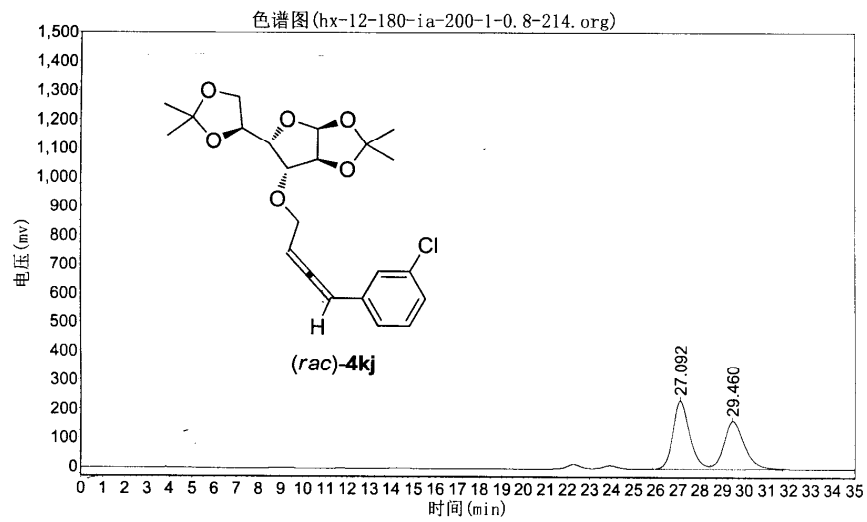

分析结果表

| 峰号 | 峰名 | 保留时间   | 峰高         | 峰面积          | 含量       |
|----|----|--------|------------|--------------|----------|
| 1  |    | 27.092 | 235268.906 | 12366506.000 | 54.2830  |
| 2  |    | 29.460 | 163780.641 | 10415041.000 | 45.7170  |
| 总计 |    |        | 399049.547 | 22781547.000 | 100.0000 |
